# Supplementary material for: Visible light catalyzed synthesis of quinolines from (aza)-Morita–Baylis–Hillman adducts
Source: Royal Society of Chemistry journal article supplement (doi:10.1039/c8ob02260g), 2018-01-01
Supplement: c8ob02260g1.pdf [file c8ob02260g1.pdf]

Supporting Information  
For

**Visible Light Catalyzed Synthesis of Quinolines from (Aza)-Morita-Baylis-Hillman Adducts**

Atul Kumar Chaturvedi,<sup>a,b</sup> Namrata Rastogi\*,<sup>a,b</sup>

<sup>a</sup>Medicinal & Process Chemistry Division, CSIR-Central Drug Research Institute, Sector 10, Jankipuram Extension, Sitapur Road, P.O. Box 173, Lucknow 226031, India

<sup>b</sup>Academy of Scientific and Innovative Research, New Delhi 110001, India

*namrataiit@gmail.com; namrata.rastogi@cdri.res.in*

**Table of Contents**

|                                                               |       |
|---------------------------------------------------------------|-------|
| General Information.....                                      | 2     |
| General Procedures.....                                       | 2-3   |
| Compound Characterization.....                                | 3-19  |
| References.....                                               | 19    |
| <sup>1</sup> H & <sup>13</sup> C NMR Spectra of Products..... | 20-54 |

## 1. General Information

All reactions were monitored by TLC, visualization was effected with UV and/or by developing in iodine. Melting points were recorded on a Precision melting point apparatus and are uncorrected. NMR spectra were recorded on a Bruker Avance spectrometer at 400/500 MHz ( $^1\text{H}$ ) and 75/100/125 MHz ( $^{13}\text{C}$ ). Chemical shifts are reported in  $\delta$  (ppm) relative to TMS as the internal standard. To describe spin multiplicity, standard abbreviations such as s, d, t, q, m, dd referring to singlet, doublet, triplet, quartet, multiplet and doublet of doublet respectively, are used. The ESI-HRMS spectra were recorded on Agilent 6520-Q-ToF LC/MS system.

The *N*-tosylamide derivatives of MBH adducts **1a-1j** (EWG =  $\text{CO}_2\text{Et}$ ) and **1k-1o** (EWG =  $\text{SO}_2\text{Ph}$ ) were synthesized following the procedure reported by Kim et al.<sup>1</sup> and **1p-1t** (EWG =  $\text{COEt}$ ) were synthesized by following the procedure reported by Park et al.<sup>2</sup> The aza-MBH adducts **4a-4h** were synthesized *via* Heck reaction of corresponding  $\beta$ -unsubstituted MBH adducts with aryl halides following literature protocol.<sup>3</sup> All other chemicals, solvents and catalysts were purchased from commercial sources and used as received.

The characterization data for all starting substrates (except **1a** and **4a** which are known compounds) and products has been provided. All the aza-MBH adducts **4a-4h** (except **4b**) were isolated as the mixture of *E* and *Z* isomers and were used as such for the VLPC reaction. In case of **4b**, the two isomers were separated and *E*-isomer was used for the dihydroquinoline synthesis. The peaks for the *E* and *Z* isomers in  $^1\text{H}$  NMR were assigned by comparing with literature data and by establishing analogy with the pure *E*-isomer separated in case of **4b**. The yield of **5a** and **5c-5h** were calculated on the basis of recovered starting material (primarily *Z*-isomer).

## 2. General Procedures

### 2.1 VLPC synthesis of dihydroquinolines (2, 5) &/or quinolines (3)

In an oven dried 5 mL snap vial equipped with a magnetic stirring bar, the *N*-tosylamide derivatives of MBH adducts **1** or aza-MBH adducts **4** (0.2 mmol), NaOH (0.016 g, 0.4 mmol, 2.0 equiv) and photocatalyst  $\text{Ru}(\text{bpy})_3\text{Cl}_2$  (0.003 g, 0.004 mmol, 2.0 mol%) were dissolved in anhydrous  $\text{CHCl}_3$  (3 mL). The open vial was irradiated using 450 nm blue LEDs with a cooling device maintaining the temperature around 25 °C. After 8-12 h of irradiation (TLC monitoring), the reaction mixture was diluted with water and extracted with dichloromethane (3 x 10 mL). The combined organic layers were dried ( $\text{Na}_2\text{SO}_4$ ) and concentrated under

reduced pressure. The residue was purified by column chromatography on silica gel using hexane/ethyl acetate as eluent to afford the pure products **2**, **5** and/or **3**.

## 2.2 Synthesis of quinolines from dihydroquinolines

**Method A<sup>4</sup>:** A mixture of **2** (0.1 mmol) in aq NaOH (1 mL) and MeOH (4 mL) was refluxed overnight. The reaction was brought to room temperature upon completion (TLC monitoring) and solvent was removed under pressure. The reaction mixture was extracted with dichloromethane (3 x 10 mL) and combined organic layers were washed with brine, dried (Na<sub>2</sub>SO<sub>4</sub>) and concentrated under reduced pressure. The residue was purified by column chromatography on silica gel using hexane/ethyl acetate as eluent to afford the pure product **3**.

**Method B<sup>5</sup>:** A mixture of **2** (0.1 mmol) and DBU (0.015 g, 0.1 mmol, 1.0 equiv) in THF (5 mL) was refluxed overnight. Upon reaction completion (TLC monitoring), the reaction mixture was brought to room temperature and extracted with dichloromethane (3 x 10 mL). Combined organic layers were washed with brine, dried (Na<sub>2</sub>SO<sub>4</sub>) and concentrated under reduced pressure. The residue was purified by column chromatography on silica gel using hexane/ethyl acetate as eluent to afford the pure product **3**.

## 2.3 Details of radical trapping experiment

In an oven dried 5 mL snap vial equipped with a magnetic stirring bar, the ethyl (*E*)-3-(2,6-dichlorophenyl)-2-(((4-methylphenyl)sulfonamido)methyl)acrylate **1u** (0.2 mmol), NaOH (0.016 g, 0.4 mmol, 2.0 equiv), photocatalyst Ru(bpy)<sub>3</sub>Cl<sub>2</sub> (0.003 g, 0.004 mmol, 2.0 mol%) and allyl tributyltin (0.12 mL, 0.4 mmol, 2.0 equiv) were dissolved in anhydrous CHCl<sub>3</sub> (3 mL). The open vial was irradiated using 450 nm blue LEDs with a cooling device maintaining the temperature around 25 °C. After 12 h of irradiation (TLC monitoring), the reaction mixture was diluted with water and extracted with dichloromethane (3 x 10 mL). The combined organic layers were dried (Na<sub>2</sub>SO<sub>4</sub>) and concentrated under reduced pressure. The crude product **6** was analyzed by High Resolution Mass Spectrometry.

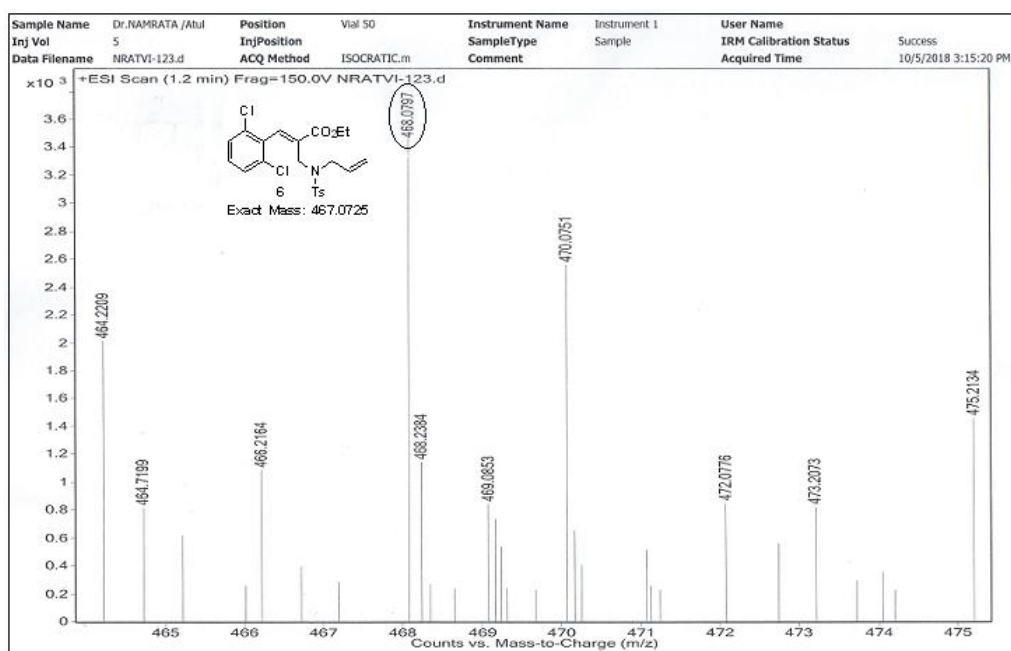

### 3. Compound Characterization

#### Ethyl (*E*)-2-(((4-methylphenyl)sulfonamido)methyl)-3-phenylacrylate (**1a**)<sup>6</sup>

White solid; Isolated yield 61% (219 mg). The spectroscopic data matches well with the reported data.

#### Ethyl (*E*)-2-(((4-methylphenyl)sulfonamido)methyl)-3-(*p*-tolyl)acrylate (**1b**)

White sticky solid; isolated yield 69% (193 mg).  $R_f$  0.50 (25% EtOAc/hexane);  $^1\text{H NMR}$  (400 MHz,  $\text{CDCl}_3$ )  $\delta$  7.70 (d,  $J = 2.4$  Hz, 2H), 7.67 (s, 1H), 7.31 (d,  $J = 8.1$  Hz, 2H), 7.26 (d,  $J = 7.9$  Hz, 2H), 7.20 (d,  $J = 8.0$  Hz, 2H), 5.30 (t,  $J = 6.4$  Hz, 1H), 4.18 (q,  $J = 7.1$  Hz, 2H), 3.95 (d,  $J = 6.4$  Hz, 2H), 2.41 (s, 3H), 2.37 (s, 3H), 1.27 (t,  $J = 7.1$  Hz, 3H);  $^{13}\text{C NMR}$  (100 MHz,  $\text{CDCl}_3$ )  $\delta$  167.30, 143.30, 139.77, 136.51, 131.09, 129.58, 129.43, 127.21, 125.68, 61.18, 40.64, 21.45, 21.35, 14.13; **HRMS** for  $\text{C}_{20}\text{H}_{23}\text{NO}_4\text{S}$ : calcd.  $(\text{M}+\text{H})^+$ : 374.1421, found: 374.1420

#### Ethyl (*E*)-3-(2-bromo-4-methylphenyl)-2-(((4-methylphenyl)sulfonamido)methyl)acrylate (**1c**)

White solid; isolated yield 40% (180 mg).  $R_f$  0.50 (25% EtOAc/hexane);  $^1\text{H NMR}$  (400 MHz,  $\text{CDCl}_3$ )  $\delta$  7.71 (s, 1H), 7.60 (d,  $J = 7.9$  Hz, 2H), 7.35 (s, 1H), 7.29 (d,  $J = 7.9$  Hz, 1H), 7.19 (d,  $J = 7.9$  Hz, 2H), 7.09 (d,  $J = 7.9$  Hz, 1H), 5.16 (t,  $J = 6.6$  Hz, 1H), 4.15 (q,  $J = 7.1$  Hz, 2H), 3.75 (d,  $J = 6.6$  Hz, 2H), 2.35 (s, 3H), 2.29 (s, 3H), 1.23 (t,  $J = 7.1$  Hz, 3H);  $^{13}\text{C NMR}$  (100 MHz,  $\text{CDCl}_3$ )  $\delta$  166.95, 143.45, 142.18, 141.42, 136.46, 133.31, 131.32, 130.56, 129.71, 128.52, 127.59, 127.19, 123.99, 61.45, 40.89, 21.53, 21.00, 14.18; **HRMS** for  $\text{C}_{20}\text{H}_{22}\text{BrNO}_4\text{S}$ : calcd.  $(\text{M}+\text{H})^+$ : 452.0526, found: 452.0529

**Ethyl (*E*)-3-(2-bromophenyl)-2-(((4-methylphenyl)sulfonamido)methyl)acrylate (1d)**

White solid; isolated yield 48% (209 mg).  $R_f$  0.50 (25% EtOAc/hexane);  $^1\text{H NMR}$  (400 MHz,  $\text{CDCl}_3$ )  $\delta$  7.79 (s, 1H), 7.64-7.67 (m, 2H), 7.60 (dd,  $J = 8.0$  Hz, 1.0 Hz, 1H), 7.45 (dd,  $J = 7.7$  Hz, 1.4 Hz, 1H), 7.34-7.38 (m, 1H), 7.22-7.27 (m, 3H), 5.26 (d,  $J = 6.6$  Hz, 1H), 4.23 (q,  $J = 7.2$  Hz, 2H), 3.81 (d,  $J = 6.6$  Hz, 2H), 2.41 (s, 3H), 1.31 (t,  $J = 7.2$  Hz, 3H);  $^{13}\text{C NMR}$  (100 MHz,  $\text{CDCl}_3$ )  $\delta$  166.79, 143.45, 142.01, 136.51, 134.40, 132.81, 130.78, 130.66, 129.71, 128.36, 127.68, 127.19, 124.03, 61.53, 40.75, 21.51, 14.17; **HRMS** for  $\text{C}_{19}\text{H}_{20}\text{BrNO}_4\text{S}$ : calcd.  $(\text{M}+\text{H})^+$ : 438.0369, found: 438.0362

**Ethyl (*E*)-3-(3-chlorophenyl)-2-(((4-methylphenyl)sulfonamido)methyl)acrylate (1e)**

White solid; isolated yield 61% (240 mg).  $R_f$  0.50 (25% EtOAc/hexane);  $^1\text{H NMR}$  (400 MHz,  $\text{CDCl}_3$ )  $\delta$  7.58-7.60 (s, d merged, 3H), 7.25-7.29 (m, 4H), 7.20 (d,  $J = 7.9$  Hz, 2H), 5.15 (d,  $J = 5.9$  Hz, 1H), 4.15 (q,  $J = 7.1$  Hz, 2H), 3.84 (d,  $J = 6.6$  Hz, 2H), 2.35 (s, 3H), 1.23 (t,  $J = 7.1$  Hz, 3H);  $^{13}\text{C NMR}$  (100 MHz,  $\text{CDCl}_3$ )  $\delta$  166.88, 143.54, 141.32, 136.48, 135.72, 134.74, 130.09, 129.69, 129.41, 129.36, 128.24, 127.38, 127.23, 61.54, 40.42, 21.53, 14.18; **HRMS** for  $\text{C}_{19}\text{H}_{20}\text{ClNO}_4\text{S}$ : calcd.  $(\text{M}+\text{H})^+$ : 394.0874, found: 394.0867

**Ethyl (*E*)-3-(3-fluorophenyl)-2-(((4-methylphenyl)sulfonamido)methyl)acrylate (1f)**

White solid; isolated yield 63% (237 mg).  $R_f$  0.50 (25% EtOAc/hexane);  $^1\text{H NMR}$  (400 MHz,  $\text{CDCl}_3$ )  $\delta$  7.59-7.61 (s, d merged, 3H), 7.28-7.33 (m, 1H), 7.20 (d,  $J = 6.8$  Hz, 2H), 7.13 (d,  $J = 7.7$  Hz, 1H), 6.99-7.03 (m, 2H), 5.12-5.18 (m, 1H), 4.15 (q,  $J = 7.1$  Hz, 2H), 3.85 (d,  $J = 6.6$  Hz, 2H), 2.35 (s, 3H), 1.23 (t,  $J = 7.1$  Hz, 3H);  $^{13}\text{C NMR}$  (100 MHz,  $\text{CDCl}_3$ )  $\delta$  166.92, 162.74 (d,  $J_{\text{C-F}} = 246.0$  Hz), 143.56, 141.55 (d,  $J_{\text{C-F}} = 2.2$  Hz), 136.48, 136.03 (d,  $J_{\text{C-F}} = 7.7$  Hz), 130.42 (d,  $J_{\text{C-F}} = 8.3$  Hz), 129.69, 128.06, 127.23, 125.12 (d,  $J_{\text{C-F}} = 3.0$  Hz), 116.35 (d,  $J_{\text{C-F}} = 20.9$  Hz), 116.21 (d,  $J_{\text{C-F}} = 22.0$  Hz), 61.52, 40.45, 21.51, 14.17; **HRMS** for  $\text{C}_{19}\text{H}_{20}\text{FNO}_4\text{S}$ : calcd.  $(\text{M}+\text{H})^+$ : 378.1170, found: 378.1173

**Ethyl (*E*)-2-(((4-methylphenyl)sulfonamido)methyl)-3-(2-(trifluoromethoxy)phenyl)acrylate (1g)**

White solid; isolated yield 68% (301 mg).  $R_f$  0.50 (25% EtOAc/hexane);  $^1\text{H NMR}$  (400 MHz,  $\text{CDCl}_3$ )  $\delta$  7.72 (s, 1H), 7.60 (d,  $J = 8.3$  Hz, 2H), 7.49 (d,  $J = 7.5$  Hz, 1H), 7.35-7.39 (m, 1H), 7.27-7.31 (m, 1H), 7.18-7.24 (m, 4H), 5.15 (d,  $J = 6.0$  Hz, 1H), 4.16 (q,  $J = 7.1$  Hz, 2H), 3.76 (d,  $J = 6.6$  Hz, 2H), 2.35 (s, 3H), 1.24 (t,  $J = 7.1$  Hz, 3H);  $^{13}\text{C NMR}$  (100 MHz,  $\text{CDCl}_3$ )  $\delta$  166.66, 147.11, 143.54, 136.93, 136.46, 130.99, 130.91, 129.71, 129.23, 127.43, 127.18, 120.84, 61.56, 40.87, 21.49, 14.10; **HRMS** for  $\text{C}_{20}\text{H}_{20}\text{F}_3\text{NO}_5\text{S}$ : calcd.  $(\text{M}+\text{H})^+$ : 444.1087, found: 444.1088

**Ethyl (E)-2-(((4-methylphenyl)sulfonamido)methyl)-3-(3-nitrophenyl)acrylate (1h)**

White solid; isolated yield 57% (230 mg).  $R_f$  0.50 (25% EtOAc/hexane);  $^1\text{H NMR}$  (400 MHz,  $\text{CDCl}_3$ )  $\delta$  8.15-8.18 (m, 1H), 8.08 (br s, 1H), 7.73-7.78 (m, 2H), 7.67 (s, 1H), 7.54-7.59 (m, 2H), 7.19-7.24 (m, 2H), 5.24 (t,  $J = 6.5$  Hz, 1H), 4.18 (q,  $J = 7.1$  Hz, 2H), 3.82 (d,  $J = 6.6$  Hz, 2H), 2.35 (s, 3H), 1.25 (t,  $J = 7.2$  Hz, 3H);  $^{13}\text{C NMR}$  (100 MHz,  $\text{CDCl}_3$ )  $\delta$  166.52, 148.37, 143.75, 140.02, 136.38, 135.61, 135.00, 130.02, 129.74, 127.15, 126.45, 124.24, 123.90, 61.79, 40.29, 21.51, 14.16; **HRMS** for  $\text{C}_{19}\text{H}_{20}\text{N}_2\text{O}_6\text{S}$ : calcd.  $(\text{M}+\text{H})^+$ : 405.1115, found: 405.1114

**Ethyl (E)-2-(((4-methylphenyl)sulfonamido)methyl)-3-(4-nitrophenyl)acrylate (1i)**

Light yellow solid; isolated yield 70% (283 mg).  $R_f$  0.50 (25% EtOAc/hexane);  $^1\text{H NMR}$  (400 MHz,  $\text{CDCl}_3$ )  $\delta$  8.24 (d,  $J = 8.7$  Hz, 2H), 7.76 (s, 1H), 7.68 (d,  $J = 8.2$  Hz, 2H), 7.57 (d,  $J = 8.6$  Hz, 2H), 7.29 (d,  $J = 8.0$  Hz, 2H), 5.24 (t,  $J = 6.6$  Hz, 1H), 4.26 (q,  $J = 7.1$  Hz, 2H), 3.85 (d,  $J = 6.6$  Hz, 2H), 2.44 (s, 3H), 1.33 (t,  $J = 7.1$  Hz, 3H);  $^{13}\text{C NMR}$  (100 MHz,  $\text{CDCl}_3$ )  $\delta$  166.48, 147.96, 143.87, 140.35, 140.24, 136.29, 130.22, 130.10, 129.80, 127.24, 123.91, 61.85, 40.41, 21.53, 14.16; **HRMS** for  $\text{C}_{19}\text{H}_{20}\text{N}_2\text{O}_6\text{S}$ : calcd.  $(\text{M}+\text{H})^+$ : 405.1115, found: 405.1111

**Ethyl (E)-2-(((4-methylphenyl)sulfonamido)methyl)-3-(thiophen-2-yl)acrylate (1j)**

White solid; isolated yield 49% (178 mg).  $R_f$  0.50 (25% EtOAc/hexane);  $^1\text{H NMR}$  (400 MHz,  $\text{CDCl}_3$ )  $\delta$  7.66 (d,  $J = 8.3$  Hz, 2H), 7.52 (s, 1H), 7.21 (d,  $J = 8.0$  Hz, 2H), 7.04 (d,  $J = 4.0$  Hz, 1H), 6.98 (d,  $J = 3.9$  Hz, 1H), 5.03 (d,  $J = 6.2$  Hz, 1H), 4.10 (q,  $J = 7.1$  Hz, 2H), 3.98 (d,  $J = 6.3$  Hz, 2H), 2.35 (s, 3H), 1.19 (t,  $J = 7.2$  Hz, 3H);  $^{13}\text{C NMR}$  (100 MHz,  $\text{CDCl}_3$ )  $\delta$  167.16, 143.43, 136.76, 136.73, 134.79, 133.16, 130.64, 129.60, 128.04, 127.30, 123.03, 61.30, 40.69, 21.53, 14.22; **HRMS** for  $\text{C}_{17}\text{H}_{19}\text{NO}_4\text{S}_2$ : calcd.  $(\text{M}+\text{H})^+$ : 366.0828, found: 394.874

**(E)-4-Methyl-N-(3-phenyl-2-(phenylsulfonyl)allyl)benzenesulfonamide (1k)**

White solid; isolated yield 58% (248 mg).  $R_f$  0.50 (25% EtOAc/hexane);  $^1\text{H NMR}$  (400 MHz,  $\text{CDCl}_3$ )  $\delta$  7.86 (s, 1H), 7.65 (d,  $J = 8.2$  Hz, 2H), 7.48-7.54 (m, 3H), 7.43-7.44 (m, 2H), 7.32-7.36 (m, 5H), 7.28 (d,  $J = 8.0$  Hz, 2H), 5.13 (d,  $J = 5.6$  Hz, 1H), 3.65 (d,  $J = 5.8$  Hz, 2H), 2.44 (s, 3H);  $^{13}\text{C NMR}$  (100 MHz,  $\text{CDCl}_3$ )  $\delta$  143.86, 143.30, 137.88, 135.46, 134.28, 133.81, 131.97, 130.81, 129.94, 129.83, 129.33, 129.11, 128.15, 127.65, 39.74, 21.63; **HRMS** for  $\text{C}_{22}\text{H}_{21}\text{NO}_4\text{S}_2$ : calcd.  $(\text{M}+\text{H})^+$ : 428.0985, found: 428.0981

**(E)-4-Methyl-N-(2-(phenylsulfonyl)-3-(p-tolyl)allyl)benzenesulfonamide (1l)**

White solid; isolated yield 59% (260 mg).  $R_f$  0.50 (25% EtOAc/hexane)  $^1\text{H NMR}$  (400 MHz,  $\text{CDCl}_3$ )  $\delta$  7.83 (s, 1H), 7.66 (d,  $J = 8.2$  Hz, 2H), 7.46-7.51 (m, 3H), 7.33-7.36 (m, 4H), 7.28-7.31 (m, 2H), 7.14 (d,  $J = 7.8$  Hz, 2H), 5.09 (s, 1H), 3.65 (d,  $J = 5.7$  Hz, 2H), 2.44 (s, 3H),

2.31 (s, 3H);  $^{13}\text{C}$  NMR (100 MHz,  $\text{CDCl}_3$ )  $\delta$  143.82, 143.37, 141.50, 138.08, 135.51, 133.70, 133.09, 130.07, 129.85, 129.81, 129.29, 129.19, 128.10, 127.66, 39.83, 21.62, 21.51; HRMS for  $\text{C}_{23}\text{H}_{23}\text{NO}_4\text{S}_2$ : calcd. (M+H) $^+$ : 442.1141, found: 442.1134

**(E)-N-(3-(2-Bromo-4-methylphenyl)-2-(phenylsulfonyl)allyl)-4-methylbenzenesulfonamide (1m)**

White solid; isolated yield 70% (363 mg).  $R_f$  0.50 (25% EtOAc/hexane)  $^1\text{H}$  NMR (400 MHz,  $\text{CDCl}_3$ )  $\delta$  7.97 (s, 1H), 7.63 (d,  $J = 8.2$  Hz, 2H), 7.50-7.54 (m, 3H), 7.41 (d,  $J = 7.9$  Hz, 1H), 7.37 (s, 1H), 7.34 (d,  $J = 7.7$  Hz, 2H), 7.27 (d,  $J = 8.0$  Hz, 2H), 7.08 (d,  $J = 7.7$  Hz, 1H), 5.30 (t,  $J = 5.8$  Hz, 1H), 3.49 (d,  $J = 5.9$  Hz, 2H), 2.43 (s, 3H), 2.29 (s, 3H);  $^{13}\text{C}$  NMR (100 MHz,  $\text{CDCl}_3$ )  $\delta$  143.84, 143.11, 142.65, 137.76, 135.61, 135.45, 133.86, 133.45, 130.25, 129.83, 129.38, 129.33, 128.86, 128.21, 127.58, 124.40, 39.81, 21.62, 21.10; HRMS for  $\text{C}_{23}\text{H}_{22}\text{BrNO}_4\text{S}_2$ : calcd. (M+H) $^+$ : 520.0246, found: 520.0240

**(E)-N-(3-(3-Fluorophenyl)-2-(phenylsulfonyl)allyl)-4-methylbenzenesulfonamide (1n)**

White solid; isolated yield 52% (231 mg).  $R_f$  0.50 (25% EtOAc/hexane);  $^1\text{H}$  NMR (400 MHz,  $\text{CDCl}_3$ )  $\delta$  7.87 (s, 1H), 7.70-7.72 (m, 2H), 7.56-7.63 (m, 3H), 7.30-7.45 (m, 6H), 7.10-7.19 (m, 2H), 5.21 (t,  $J = 5.8$  Hz, 1H), 3.70 (d,  $J = 5.8$  Hz, 2H), 2.50 (s, 3H);  $^{13}\text{C}$  NMR (125 MHz,  $\text{CDCl}_3$ )  $\delta$  162.80 (d,  $J_{\text{C-F}} = 246.7$  Hz), 143.99, 141.70 (d,  $J_{\text{C-F}} = 1.5$  Hz), 137.64, 136.00, 135.42, 134.01, 133.95 (d,  $J_{\text{C-F}} = 7.5$  Hz), 130.79 (d,  $J_{\text{C-F}} = 8.2$  Hz), 129.86, 129.44, 128.22, 127.58, 125.49 (d,  $J_{\text{C-F}} = 2.7$  Hz), 117.69 (d,  $J_{\text{C-F}} = 20.9$  Hz), 116.65 (d,  $J_{\text{C-F}} = 22.4$  Hz), 39.55, 21.60; HRMS for  $\text{C}_{22}\text{H}_{20}\text{FNO}_4\text{S}_2$ : calcd. (M+H) $^+$ : 446.0891, found: 446.0883

**(E)-4-methyl-N-(2-(phenylsulfonyl)-3-(4-(trifluoromethoxy) phenyl) allyl) benzenesulfonamide (1o)**

White solid; isolated yield 56% (286 mg).  $R_f$  0.50 (25% EtOAc/hexane);  $^1\text{H}$  NMR (400 MHz,  $\text{CDCl}_3$ )  $\delta$  7.83 (s, 1H), 7.66 (d,  $J = 8.2$  Hz, 2H), 7.47-7.55 (m, 5H), 7.36 (t,  $J = 8.1$  Hz, 2H), 7.30 (d,  $J = 8.0$  Hz, 2H), 7.17 (d,  $J = 8.2$  Hz, 2H), 5.12 (t,  $J = 5.8$  Hz, 1H), 3.61 (d,  $J = 5.9$  Hz, 2H), 2.44 (s, 3H);  $^{13}\text{C}$  NMR (100 MHz,  $\text{CDCl}_3$ )  $\delta$  144.41, 138.73, 136.79, 134.85, 134.53, 134.16, 130.79, 130.27, 129.71, 129.44, 128.21, 127.24, 125.11, 119.18, 119.07, 43.62, 21.58; HRMS for  $\text{C}_{23}\text{H}_{20}\text{F}_3\text{NO}_5\text{S}_2$ : calcd. (M+H) $^+$ : 512.0808, found: 512.0810

**(E)-N-(2-Benzylidene-3-oxopentyl)-4-methylbenzenesulfonamide (1p)<sup>2</sup>**

White solid; isolated yield 57% (195 mg). The spectroscopic data matches well with the reported data.

**(E)-4-Methyl-N-(2-(4-methylbenzylidene)-3-oxopentyl)benzenesulfonamide (1q)<sup>7</sup>**

White solid; isolated yield 36% (128 mg). The spectroscopic data matches well with the reported data.

**(E)-N-(2-(3-bromobenzylidene)-3-oxopentyl)-4-methylbenzenesulfonamide (1r)**

Colourless solid; isolated yield 46% (193 mg).  $R_f$  0.50 (25% EtOAc/hexane);  $^1\text{H NMR}$  (400 MHz,  $\text{CDCl}_3$ )  $\delta$  7.59 (d,  $J = 8.2$  Hz, 2H), 7.47 (d,  $J = 6.4$  Hz, 2H), 7.43 (s, 1H), 7.37 (d,  $J = 7.6$  Hz, 1H), 7.19-7.27 (m merged with solvent peak, 3H), 5.16 (t,  $J = 6.5$  Hz, 1H), 3.78 (d,  $J = 6.7$  Hz, 2H), 2.63 (q,  $J = 7.2$  Hz, 2H), 2.35 (s, 3H), 1.03 (t,  $J = 7.2$  Hz, 3H);  $^{13}\text{C NMR}$  (100 MHz,  $\text{CDCl}_3$ )  $\delta$  202.85, 143.50, 140.75, 136.61, 136.49, 135.97, 132.51, 132.24, 130.44, 129.70, 127.95, 127.24, 122.86, 40.08, 30.44, 21.53, 8.24; **HRMS** for  $\text{C}_{20}\text{H}_{33}\text{NO}_3\text{S}$ : calcd. (M+H)<sup>+</sup>: 422.0420, found: 422.0423

**(E)-N-(2-(2-fluorobenzylidene)-3-oxopentyl)-4-methylbenzenesulfonamide (1s)**

Colourless solid; isolated yield 52% (188 mg).  $R_f$  0.50 (25% EtOAc/hexane);  $^1\text{H NMR}$  (400 MHz,  $\text{CDCl}_3$ )  $\delta$  7.57 (d,  $J = 8.2$  Hz, 2H), 7.55 (s, 1H), 7.49 (t,  $J = 7.6$  Hz, 1H), 7.31-7.37 (m, 1H), 7.15-7.20 (m, 3H), 7.02-7.07 (m, 1H), 5.20 (t,  $J = 6.3$  Hz, 1H), 3.79 (d,  $J = 6.7$  Hz, 2H), 2.62 (q,  $J = 7.2$  Hz, 2H), 2.34 (s, 3H), 1.02 (t,  $J = 7.2$  Hz, 3H);  $^{13}\text{C NMR}$  (100 MHz,  $\text{CDCl}_3$ )  $\delta$  202.89, 160.32 (d,  $J_{\text{C-F}} = 248.6$  Hz), 143.45, 136.86, 136.59, 135.23 (d,  $J_{\text{C-F}} = 4.0$  Hz), 131.73 (d,  $J_{\text{C-F}} = 8.4$  Hz), 130.89 (d,  $J_{\text{C-F}} = 1.7$  Hz), 129.68, 127.21, 124.64 (d,  $J_{\text{C-F}} = 3.6$  Hz), 121.95 (d,  $J_{\text{C-F}} = 13.3$  Hz), 115.63 (d,  $J_{\text{C-F}} = 21.4$  Hz), 40.51, 30.49, 21.50, 8.21; **HRMS** for  $\text{C}_{19}\text{H}_{20}\text{FNO}_3\text{S}$ : calcd. (M+H)<sup>+</sup>: 362.1221, found: 362.1226

**(E)-4-methyl-N-(3-oxo-2-(4-(trifluoromethoxy)benzylidene)pentyl)benzenesulfonamide (1t)**

Colourless solid; isolated yield 48% (205 mg).  $R_f$  0.50 (25% EtOAc/hexane);  $^1\text{H NMR}$  (400 MHz,  $\text{CDCl}_3$ )  $\delta$  7.60-7.63 (m, 2H), 7.50 (s, 1H), 7.43-7.46 (m, 2H), 7.20-7.23 (m, 4H), 5.12 (t,  $J = 6.6$  Hz, 1H), 3.76 (d,  $J = 6.7$  Hz, 2H), 2.66 (q,  $J = 7.2$  Hz, 2H), 2.35 (s, 3H), 1.04 (t,  $J = 7.2$  Hz, 3H);  $^{13}\text{C NMR}$  (100 MHz,  $\text{CDCl}_3$ )  $\delta$  202.87, 149.96, 143.60, 141.03, 136.35, 136.02, 132.44, 131.28, 129.73, 127.27, 121.03, 40.21, 30.38, 21.50, 8.25; **HRMS** for  $\text{C}_{20}\text{H}_{20}\text{F}_3\text{NO}_4\text{S}$ : calcd. (M+H)<sup>+</sup>: 428.1138, found: 428.1139

**Ethyl (E)-3-(2,6-dichlorophenyl)-2-(((4-methylphenyl)sulfonamido)methyl)acrylate (1u)**

White solid; isolated yield 68% (290 mg).  $R_f$  0.50 (25% EtOAc/hexane);  $^1\text{H NMR}$  (400 MHz,  $\text{CDCl}_3$ )  $\delta$  7.48-7.51 (m, 2H), 7.42 (s, 1H), 7.23-7.25 (m, 2H), 7.11-7.17 (m, 3H), 5.03 (t,  $J = 6.4$  Hz, 1H), 4.14 (q,  $J = 7.2$  Hz, 2H), 3.57 (d,  $J = 6.5$  Hz, 2H), 2.31 (s, 3H), 1.23 (t,  $J = 7.2$  Hz, 3H);  $^{13}\text{C NMR}$  (75 MHz,  $\text{CDCl}_3$ )  $\delta$  165.87, 143.17, 136.72, 136.62, 134.05, 132.03, 131.88, 130.10, 129.52, 128.11, 127.07, 61.63, 41.01, 21.48, 14.10; **HRMS** for  $\text{C}_{19}\text{H}_{19}\text{Cl}_2\text{NO}_4\text{S}$ : calcd. (M+H)<sup>+</sup>: 428.0485, found: 428.0486



**Ethyl 1-tosyl-1,2-dihydroquinoline-3-carboxylate (2a)<sup>8</sup>**

White solid; isolated yield 84% (60 mg).  $R_f$  0.50 (20% EtOAc/hexane); Mp 116 °C;  $^1\text{H NMR}$  (400 MHz,  $\text{CDCl}_3$ )  $\delta$  7.68 (d,  $J = 8.1$  Hz, 1H), 7.32-7.36 (m, 1H), 7.16-7.20 (m, 3H), 7.04 (dd,  $J = 7.6$  Hz, 1.2 Hz, 1H), 6.97 (d,  $J = 8.2$  Hz, 2H), 6.88 (s, 1H), 4.60 (d,  $J = 0.8$  Hz, 2H), 4.15 (q,  $J = 7.1$  Hz, 2H), 2.26 (s, 3H), 1.24 (t,  $J = 7.1$  Hz, 3H);  $^{13}\text{C NMR}$  (100 MHz,  $\text{CDCl}_3$ )  $\delta$  164.26, 143.78, 136.20, 135.87, 133.38, 130.44, 129.14, 128.52, 128.07, 127.24, 126.99, 126.95, 125.38, 60.84, 44.33, 21.50, 14.33; **HRMS** for  $\text{C}_{19}\text{H}_{19}\text{NO}_4\text{S}$ : calcd. (M+H)<sup>+</sup>: 358.1108, found: 358.1110

**Ethyl 7-methyl-1-tosyl-1,2-dihydroquinoline-3-carboxylate (2b)**

White solid; isolated yield 84% (62 mg).  $R_f$  0.50 (20% EtOAc/hexane); Mp 127-128 °C;  $^1\text{H NMR}$  (400 MHz,  $\text{CDCl}_3$ )  $\delta$  7.49 (s, 1H), 7.17-7.19 (m, 2H), 6.91-6.99 (m, 4H), 6.84 (s, 1H), 4.55 (br s, 2H), 4.12 (q,  $J = 7.1$  Hz, 2H), 2.35 (s, 3H), 2.24 (s, 3H), 1.22 (t,  $J = 7.1$  Hz, 3H);  $^{13}\text{C NMR}$  (100 MHz,  $\text{CDCl}_3$ )  $\delta$  164.38, 143.70, 141.17, 136.14, 135.91, 133.49, 129.09, 128.34, 127.83, 127.79, 127.01, 125.47, 124.13, 60.71, 44.38, 21.79, 21.50, 14.35; **HRMS** for  $\text{C}_{20}\text{H}_{21}\text{NO}_4\text{S}$ : calcd. (M+H)<sup>+</sup>: 372.1264, found: 372.1256

**Ethyl 5-bromo-7-methyl-1-tosyl-1,2-dihydroquinoline-3-carboxylate (2c)**

White solid; isolated yield 78% (70 mg).  $R_f$  0.50 (20% EtOAc/hexane); Mp 152-153 °C;  $^1\text{H NMR}$  (400 MHz,  $\text{CDCl}_3$ )  $\delta$  7.47 (s, 1H), 7.26 (s, 1H), 7.20 (d,  $J = 8.3$  Hz, 2H), 7.14 (s, 1H), 7.01 (d,  $J = 8.1$  Hz, 2H), 4.52 (s, 2H), 4.14 (q,  $J = 7.1$  Hz, 2H), 2.34 (s, 3H), 2.28 (s, 3H), 1.24 (t,  $J = 7.1$  Hz, 3H);  $^{13}\text{C NMR}$  (100 MHz,  $\text{CDCl}_3$ )  $\delta$  164.00, 144.10, 141.85, 137.64, 135.81, 131.95, 131.75, 129.27, 127.21, 126.93, 125.75, 125.28, 122.98, 60.93, 43.99, 21.54, 21.47, 14.33; **HRMS** for  $\text{C}_{20}\text{H}_{20}\text{BrNO}_4\text{S}$ : calcd. (M+H)<sup>+</sup>: 450.0369, found: 450.0373

**Ethyl 5-bromo-1-tosyl-1,2-dihydroquinoline-3-carboxylate (2d)**

White solid; isolated yield 81% (70 mg).  $R_f$  0.50 (20% EtOAc/hexane); Mp 96-97 °C;  $^1\text{H NMR}$  (400 MHz,  $\text{CDCl}_3$ )  $\delta$  7.73 (d,  $J = 8.1$  Hz, 1H), 7.49 (d,  $J = 8.0$  Hz, 1H), 7.24-7.28 (m, 4H), 7.09 (d,  $J = 8.2$  Hz, 2H), 4.63 (d,  $J = 0.9$  Hz, 2H), 4.23 (q,  $J = 7.1$  Hz, 2H), 2.36 (s, 3H), 1.32 (t,  $J = 7.2$  Hz, 3H);  $^{13}\text{C NMR}$  (100 MHz,  $\text{CDCl}_3$ )  $\delta$  163.89, 144.19, 137.90, 135.76, 131.85, 130.05, 130.76, 129.33, 127.93, 126.96, 126.54, 123.27, 61.06, 43.93, 21.56, 14.32; **HRMS** for  $\text{C}_{19}\text{H}_{18}\text{BrNO}_4\text{S}$ : calcd. (M+H)<sup>+</sup>: 436.0213, found: 436.0209

**Ethyl 6-chloro-1-tosyl-1,2-dihydroquinoline-3-carboxylate (2e)**

White solid; isolated yield 66% (52 mg).  $R_f$  0.50 (20% EtOAc/hexane); Mp 129 °C;  $^1\text{H NMR}$  (400 MHz,  $\text{CDCl}_3$ )  $\delta$  7.63 (d,  $J = 8.6$  Hz, 1H), 7.29 (dd,  $J = 8.7$  Hz, 2.0 Hz, 1H), 7.20 (d,  $J = 8.6$  Hz, 2H), 7.03 (d,  $J = 2.1$  Hz, 1H), 7.00 (d,  $J = 8.0$  Hz, 2H), 6.80 (s, 1H), 4.59 (s, 2H), 4.15 (q,  $J = 7.1$  Hz, 2H), 2.27 (s, 3H), 1.25 (t,  $J = 7.1$  Hz, 3H);  $^{13}\text{C NMR}$  (100 MHz,  $\text{CDCl}_3$ )  $\delta$

163.90, 144.08, 135.63, 134.63, 132.50, 132.06, 130.19, 129.37, 129.31, 128.56, 127.97, 126.97, 126.73, 61.05, 44.32, 21.53, 14.30; **HRMS** for C<sub>19</sub>H<sub>18</sub>ClNO<sub>4</sub>S: calcd. (M+H)<sup>+</sup>: 392.0718, found: 392.0720

#### **Ethyl 6-fluoro-1-tosyl-1,2-dihydroquinoline-3-carboxylate (2f)**

White solid; isolated yield 68% (52 mg). *R<sub>f</sub>* 0.50 (20% EtOAc/hexane); Mp 130-132 °C; **<sup>1</sup>H NMR** (400 MHz, CDCl<sub>3</sub>) δ 7.73 (dd, *J* = 8.8 Hz, 5.0 Hz, 1H), 7.25 (d, *J* = 8.2 Hz, 2H), 7.10-7.13 (m, 1H), 7.06 (d, *J* = 8.0 Hz, 2H), 6.86 (s, 1H), 6.82 (dd, *J* = 8.2 Hz, 2.8 Hz, 1H), 4.66 (s, 2H), 4.23 (q, *J* = 7.1 Hz, 2H), 2.34 (s, 3H), 1.32 (t, *J* = 7.1 Hz, 3H); **<sup>13</sup>C NMR** (100 MHz, CDCl<sub>3</sub>) δ 163.94, 160.98 (d, *J*<sub>C-F</sub> = 245.8 Hz), 144.01, 135.52, 132.23 (d, *J*<sub>C-F</sub> = 2.0 Hz), 132.02 (d, *J*<sub>C-F</sub> = 2.8 Hz), 129.66 (d, *J*<sub>C-F</sub> = 8.7 Hz), 129.23, 129.22 (d, *J*<sub>C-F</sub> = 8.3 Hz), 127.00, 126.78, 117.11 (d, *J*<sub>C-F</sub> = 22.6 Hz), 114.53 (d, *J*<sub>C-F</sub> = 23.1 Hz), 61.03, 44.40, 21.51, 14.30; **HRMS** for C<sub>19</sub>H<sub>18</sub>FNO<sub>4</sub>S: calcd. (M+H)<sup>+</sup>: 376.1013, found: 376.1005

#### **Ethyl 1-tosyl-5-(trifluoromethoxy)-1,2-dihydroquinoline-3-carboxylate (2g)**

White sticky solid; isolated yield 68% (60 mg). *R<sub>f</sub>* 0.50 (20% EtOAc/hexane); **<sup>1</sup>H NMR** (400 MHz, CDCl<sub>3</sub>) δ 7.66 (d, *J* = 8.2 Hz, 1H), 7.36 (t, *J* = 8.3 Hz, 1H), 7.16-7.19 (m, 2H), 7.09-7.12 (m, 1H), 7.07 (s, 1H), 6.99 (d, *J* = 8.0 Hz, 2H), 4.60 (d, *J* = 1.3 Hz, 2H), 4.17 (q, *J* = 7.1 Hz, 2H), 2.27 (s, 3H), 1.26 (t, *J* = 7.1 Hz, 3H); **<sup>13</sup>C NMR** (100 MHz, CDCl<sub>3</sub>) δ 163.81, 145.58, 144.28, 137.57, 135.52, 130.46, 129.29, 126.87, 126.84, 126.38, 125.77, 121.79, 121.67, 118.87, 61.10, 43.99, 21.49, 14.28; **HRMS** for C<sub>20</sub>H<sub>18</sub>F<sub>3</sub>NO<sub>5</sub>S: calcd. (M+H)<sup>+</sup>: 442.0931, found: 442.0924

#### **Ethyl 6-nitro-1-tosyl-1,2-dihydroquinoline-3-carboxylate (2h)**

White solid; isolated yield 64% (52 mg). *R<sub>f</sub>* 0.50 (20% EtOAc/hexane); Mp 147-148 °C; **<sup>1</sup>H NMR** (400 MHz, CDCl<sub>3</sub>) δ 8.16 (dd, *J* = 9.0 Hz, 2.6 Hz, 1H), 7.94 (d, *J* = 2.6 Hz, 1H), 7.86 (d, *J* = 9.0 Hz, 1H), 7.28 (d, *J* = 8.3 Hz, 2H), 7.05 (d, *J* = 8.4 Hz, 2H), 7.00 (s, 1H), 4.67 (d, *J* = 1.0 Hz, 2H), 4.19 (q, *J* = 7.2 Hz, 2H), 2.29 (s, 3H), 1.26 (t, *J* = 7.1 Hz, 3H); **<sup>13</sup>C NMR** (100 MHz, CDCl<sub>3</sub>) δ 163.51, 145.57, 144.69, 141.74, 135.62, 131.51, 129.65, 128.24, 127.77, 126.94, 126.86, 124.98, 123.49, 61.36, 44.35, 21.56, 14.27; **HRMS** for C<sub>19</sub>H<sub>18</sub>N<sub>2</sub>O<sub>6</sub>S: calcd. (M+H)<sup>+</sup>: 403.958, found: 403.956

#### **3-(Phenylsulfonyl)-1-tosyl-1,2-dihydroquinoline (2k)**

White solid; isolated yield 72% (61 mg). *R<sub>f</sub>* 0.50 (20% EtOAc/hexane); Mp 151-153 °C; **<sup>1</sup>H NMR** (400 MHz, CDCl<sub>3</sub>) δ 7.82 (d, *J* = 7.5 Hz, 2H), 7.72 (d, *J* = 8.0 Hz, 1H), 7.62 (t, *J* = 7.3 Hz, 1H), 7.52-7.55 (m, 2H), 7.36 (t, *J* = 7.4 Hz, 1H), 7.17 (d, *J* = 7.4 Hz, 1H), 7.07 (d, *J* = 7.3 Hz, 1H), 6.98 (peaks merged to appear as d, *J* = 8.4 Hz, 3H), 6.91 (d, *J* = 8.1 Hz, 2H), 4.55 (s, 2H), 2.25 (s, 3H); **<sup>13</sup>C NMR** (100 MHz, CDCl<sub>3</sub>) δ 143.99, 138.96, 135.20, 134.68, 134.46,

133.99, 132.09, 131.38, 129.62, 129.24, 129.18, 128.17, 127.25, 127.18, 126.95, 126.90, 43.83, 21.56; **HRMS** for C<sub>22</sub>H<sub>19</sub>NO<sub>4</sub>S<sub>2</sub>: calcd. (M+H)<sup>+</sup>: 426.0828, found: 426.0820

### **7-Methyl-3-(phenylsulfonyl)-1-tosyl-1,2-dihydroquinoline (2l)**

White solid; isolated yield 74% (66 mg). *R<sub>f</sub>* 0.50 (20% EtOAc/hexane); Mp 162-164 °C; **<sup>1</sup>H NMR** (400 MHz, CDCl<sub>3</sub>) δ 7.80-7.82 (m, 2H), 7.59-7.63 (m, 1H), 7.50-7.54 (m, 3H), 6.90-7.00 (peaks merged to appear as m, 7H), 4.51 (d, *J* = 0.8 Hz, 2H), 2.35 (s, 3H), 2.25 (s, 3H); **<sup>13</sup>C NMR** (100 MHz, CDCl<sub>3</sub>) δ 143.90, 142.34, 139.15, 135.14, 134.75, 133.87, 133.07, 132.27, 129.58, 129.20, 128.99, 128.10, 128.01, 127.46, 127.25, 124.29, 43.88, 21.85, 21.56; **HRMS** for C<sub>23</sub>H<sub>21</sub>NO<sub>4</sub>S<sub>2</sub>: calcd. (M+H)<sup>+</sup>: 440.0985, found: 440.0980

### **5-Bromo-7-methyl-3-(phenylsulfonyl)-1-tosyl-1,2-dihydroquinoline (2m)**

White solid; isolated yield 74% (66 mg). *R<sub>f</sub>* 0.50 (20% EtOAc/hexane); Mp 190-191 °C; **<sup>1</sup>H NMR** (400 MHz, CDCl<sub>3</sub>) δ 7.83 (d, *J* = 7.6 Hz, 2H), 7.62 (t, *J* = 7.3 Hz, 1H), 7.51-7.55 (m, 3H), 7.25 (d, *J* = 5.6 Hz, 2H), 7.05 (d, *J* = 8.2 Hz, 2H), 6.98 (d, *J* = 8.2 Hz, 2H), 4.48 (s, 2H), 2.32 (s, 3H), 2.29 (s, 3H); **<sup>13</sup>C NMR** (100 MHz, CDCl<sub>3</sub>) δ 144.37, 142.90, 138.95, 136.70, 135.01, 134.58, 134.00, 131.90, 130.88, 129.63, 129.38, 128.22, 127.28, 126.71, 124.20, 123.57, 43.53, 21.61, 21.53; **HRMS** for C<sub>23</sub>H<sub>20</sub>BrNO<sub>4</sub>S<sub>2</sub>: calcd. (M+H)<sup>+</sup>: 518.0090, found: 518.0088

### **6-Fluoro-3-(phenylsulfonyl)-1-tosyl-1,2-dihydroquinoline (2n)**

White solid; isolated yield 59% (52 mg). *R<sub>f</sub>* 0.50 (20% EtOAc/hexane); Mp 158-160 °C; **<sup>1</sup>H NMR** (400 MHz, CDCl<sub>3</sub>) δ 7.82 (d, *J* = 7.4 Hz, 2H), 7.68-7.71 (m, 1H), 7.64 (t, *J* = 7.4 Hz, 1H), 7.54 (t, *J* = 7.8 Hz, 2H), 7.03-7.08 (m, 1H), 7.00 (d, *J* = 8.3 Hz, 2H), 6.95 (d, *J* = 8.2 Hz, 2H), 6.87 (s, 1H), 6.78 (dd, *J* = 7.9 Hz, 2.8 Hz, 1H), 4.53 (s, 2H); **<sup>13</sup>C NMR** (100 MHz, CDCl<sub>3</sub>) δ 160.90 (d, *J*<sub>C-F</sub> = 247.0 Hz), 144.24, 138.64, 136.18, 134.36, 134.19, 131.06 (d, *J*<sub>C-F</sub> = 3.7 Hz), 130.87 (d, *J*<sub>C-F</sub> = 1.9 Hz), 129.70, 129.35, 129.00 (d, *J*<sub>C-F</sub> = 8.4 Hz), 128.55 (d, *J*<sub>C-F</sub> = 8.6 Hz), 128.25, 127.32, 118.03 (d, *J*<sub>C-F</sub> = 22.6 Hz), 115.28 (d, *J*<sub>C-F</sub> = 23.5 Hz), 43.92, 21.58; **HRMS** for C<sub>22</sub>H<sub>18</sub>FNO<sub>4</sub>S<sub>2</sub>: calcd. (M+H)<sup>+</sup>: 444.0734, found: 444.0732

### **3-(Phenylsulfonyl)-1-tosyl-7-(trifluoromethoxy)-1,2-dihydroquinoline (2o)**

White sticky solid; isolated yield 38% (38 mg). *R<sub>f</sub>* 0.50 (20% EtOAc/hexane); **<sup>1</sup>H NMR** (400 MHz, CDCl<sub>3</sub>) δ 7.85 (d, *J* = 7.5 Hz, 2H), 7.65 (br s, 2H), 7.54-7.58 (m, 2H), 7.11 (d, *J* = 8.5 Hz, 1H), 7.01-7.06 (m, 4H), 6.96 (d, *J* = 8.1 Hz, 2H), 4.58 (s, 2H), 2.27 (s, 3H); **<sup>13</sup>C NMR** (100 MHz, CDCl<sub>3</sub>) δ 150.75, 144.08, 141.49, 137.56, 135.31, 135.26, 134.00, 131.70, 130.42, 129.89, 129.43, 128.20, 127.66, 121.14, 119.03, 39.63, 21.59; **HRMS** for C<sub>23</sub>H<sub>18</sub>F<sub>3</sub>NO<sub>5</sub>S<sub>2</sub>: calcd. (M+H)<sup>+</sup>: 510.0651, found: 510.0652

**1-(1-Tosyl-1,2-dihydroquinolin-3-yl)propan-1-one (2p)**

White solid; isolated yield 70% (48 mg).  $R_f$  0.50 (20% EtOAc/hexane); Mp 135-136 °C;  $^1\text{H NMR}$  (400 MHz,  $\text{CDCl}_3$ )  $\delta$  7.76 (d,  $J = 8.0$  Hz, 1H), 7.41-7.45 (m, 1H), 7.22-7.29 (m, 3H), 7.16 (d,  $J = 7.5$  Hz, 1H), 7.04 (d,  $J = 8.1$  Hz, 2H), 6.83 (s, 1H), 4.64 (s, 2H), 2.39 (q,  $J = 7.1$  Hz, 2H), 2.33 (s, 3H), 1.03 (t,  $J = 7.3$  Hz, 3H);  $^{13}\text{C NMR}$  (100 MHz,  $\text{CDCl}_3$ )  $\delta$  198.30, 143.66, 136.63, 136.01, 132.74, 132.55, 130.79, 129.09, 128.71, 128.07, 127.40, 127.02, 126.97, 43.48, 30.09, 21.45, 8.40; **HRMS** for  $\text{C}_{19}\text{H}_{19}\text{NO}_3\text{S}$ : calcd.  $(\text{M}+\text{H})^+$ : 342.1158, found: 342.1147

**1-(7-Methyl-1-tosyl-1,2-dihydroquinolin-3-yl)propan-1-one (2q)**

White solid; isolated yield 72% (51 mg).  $R_f$  0.50 (20% EtOAc/hexane); Mp 152-154 °C;  $^1\text{H NMR}$  (400 MHz,  $\text{CDCl}_3$ )  $\delta$  7.51 (s, 1H), 7.16 (d,  $J = 8.2$  Hz, 2H), 6.95-7.03 (m, 4H), 6.73 (s, 1H), 4.54 (s, 2H), 2.37 (s, 3H), 2.29 (q,  $J = 7.6$  Hz, 2H), 2.25 (s, 3H), 0.94 (t,  $J = 7.3$  Hz, 3H);  $^{13}\text{C NMR}$  (100 MHz,  $\text{CDCl}_3$ )  $\delta$  198.25, 143.55, 141.63, 136.60, 136.10, 132.70, 131.71, 129.04, 128.51, 127.97, 127.87, 127.05, 125.43, 43.54, 29.98, 21.83, 21.45, 8.45; **HRMS** for  $\text{C}_{20}\text{H}_{21}\text{NO}_3\text{S}$ : calcd.  $(\text{M}+\text{H})^+$ : 356.1315, found: 356.1312

**1-(6-Bromo-1-tosyl-1,2-dihydroquinolin-3-yl)propan-1-one (2r)**

White solid; isolated yield 69% (58 mg).  $R_f$  0.50 (20% EtOAc/hexane); Mp 137-139 °C;  $^1\text{H NMR}$  (400 MHz,  $\text{CDCl}_3$ )  $\delta$  7.57 (d,  $J = 8.6$  Hz, 1H), 7.46 (dd,  $J = 8.6$  Hz, 2.3 Hz, 1H), 7.22 (d,  $J = 2.2$  Hz, 1H), 7.18 (d,  $J = 8.2$  Hz, 2H), 7.00 (d,  $J = 8.0$  Hz, 2H), 6.66 (s, 1H), 4.56 (d,  $J = 0.9$  Hz, 2H), 2.30 (q,  $J = 7.4$  Hz, 2H), 2.27 (s, 3H), 0.96 (t,  $J = 7.3$  Hz, 3H);  $^{13}\text{C NMR}$  (100 MHz,  $\text{CDCl}_3$ )  $\delta$  198.00, 143.93, 135.83, 135.61, 133.82, 133.43, 131.05, 131.00, 129.75, 129.27, 128.95, 127.01, 120.20, 43.43, 30.21, 21.48, 8.30; **HRMS** for  $\text{C}_{19}\text{H}_{18}\text{BrNO}_3\text{S}$ : calcd.  $(\text{M}+\text{H})^+$ : 420.0264, found: 420.0268

**1-(5-Fluoro-1-tosyl-1,2-dihydroquinolin-3-yl)propan-1-one (2s)**

White solid; isolated yield 68% (49 mg).  $R_f$  0.50 (20% EtOAc/hexane); Mp 141-143 °C;  $^1\text{H NMR}$  (400 MHz,  $\text{CDCl}_3$ )  $\delta$  7.52 (d,  $J = 8.2$  Hz, 1H), 7.30-7.35 (m, 1H), 7.20 (d,  $J = 5.9$  Hz, 1H), 6.99-7.01 (d and s merged, 3H), 6.90-6.94 (m, 1H), 4.58 (s, 2H), 2.35 (q,  $J = 7.3$  Hz, 2H), 2.27 (s, 3H), 0.97 (t,  $J = 7.3$  Hz, 3H);  $^{13}\text{C NMR}$  (100 MHz,  $\text{CDCl}_3$ )  $\delta$  198.06, 158.97 (d,  $J_{\text{C-F}} = 251.7$  Hz), 143.98, 137.71 (d,  $J_{\text{C-F}} = 4.3$  Hz), 135.98, 132.87 (d,  $J_{\text{C-F}} = 1.9$  Hz), 131.25 (d,  $J_{\text{C-F}} = 9.5$  Hz), 129.26, 129.96, 124.96 (d,  $J_{\text{C-F}} = 5.2$  Hz), 122.88 (d,  $J_{\text{C-F}} = 3.2$  Hz), 116.78 (d,  $J_{\text{C-F}} = 16.3$  Hz), 113.16 (d,  $J_{\text{C-F}} = 20.7$  Hz), 43.22, 30.15, 21.48, 8.31; **HRMS** for  $\text{C}_{19}\text{H}_{18}\text{FNO}_3\text{S}$ : calcd.  $(\text{M}+\text{H})^+$ : 360.1064, found: 360.1067

**1-(1-Tosyl-7-(trifluoromethoxy)-1,2-dihydroquinolin-3-yl)propan-1-one (2t)**

White solid; isolated yield 63% (54 mg).  $R_f$  0.50 (20% EtOAc/hexane); Mp 138-139 °C;  $^1\text{H NMR}$  (400 MHz,  $\text{CDCl}_3$ )  $\delta$  7.60 (s, 1H), 7.20-7.23 (m, 2H), 7.11 (d,  $J = 8.4$  Hz, 1H), 7.03-7.06 (m, 1H), 7.00 (d,  $J = 8.1$  Hz, 2H), 6.76 (s, 1H), 4.59 (d,  $J = 0.8$  Hz, 2H), 2.35 (q,  $J = 7.3$  Hz, 2H), 2.27 (s, 3H), 0.97 (t,  $J = 7.3$  Hz, 3H);  $^{13}\text{C NMR}$  (100 MHz,  $\text{CDCl}_3$ )  $\delta$  198.04, 150.17, 144.03, 138.14, 135.84, 133.00, 131.15, 129.64, 129.28, 127.02, 126.36, 121.65, 119.65, 118.86, 43.31, 30.19, 21.47, 8.33; **HRMS** for  $\text{C}_{20}\text{H}_{18}\text{F}_3\text{NO}_4\text{S}$ : calcd. (M+H) $^+$ : 426.0981, found: 426.0983

**Ethyl 6-chloroquinoline-3-carboxylate (3e)<sup>9</sup>**

White solid; isolated yield 94% (22 mg).  $R_f$  0.50 (20% EtOAc/hexane); Mp 106-108 °C;  $^1\text{H NMR}$  (500 MHz,  $\text{CDCl}_3$ )  $\delta$  9.35 (d,  $J = 2.1$  Hz, 1H), 8.67 (d,  $J = 1.8$  Hz, 1H), 8.02 (d,  $J = 9.0$  Hz, 1H), 7.83 (d,  $J = 2.3$  Hz, 1H), 7.67 (dd,  $J = 9.0$  Hz, 2.4 Hz, 1H), 4.41 (q,  $J = 7.2$  Hz, 2H), 1.40 (t,  $J = 7.2$  Hz, 3H);  $^{13}\text{C NMR}$  (125 MHz,  $\text{CDCl}_3$ )  $\delta$  164.97, 150.25, 148.17, 137.57, 133.26, 132.59, 131.10, 127.52, 127.50, 124.14, 61.70, 14.31; **HRMS** for  $\text{C}_{12}\text{H}_{10}\text{ClNO}_2$ : calcd. (M+H) $^+$ : 236.0473, found: 236.0480

**Ethyl 6-fluoroquinoline-3-carboxylate (3f)<sup>9</sup>**

White solid; isolated yield 87% (19 mg).  $R_f$  0.50 (20% EtOAc/hexane); Mp 109-111 °C;  $^1\text{H NMR}$  (500 MHz,  $\text{CDCl}_3$ )  $\delta$  9.33 (d,  $J = 1.9$  Hz, 1H), 8.71 (d,  $J = 1.8$  Hz, 1H), 8.09 (dd,  $J = 9.2$  Hz, 5.3 Hz, 1H), 7.50-7.54 (m, 1H), 7.47 (dd,  $J = 8.5$  Hz, 2.8 Hz, 1H), 4.41 (q,  $J = 7.2$  Hz, 2H), 1.39 (t,  $J = 7.2$  Hz, 3H);  $^{13}\text{C NMR}$  (125 MHz,  $\text{CDCl}_3$ )  $\delta$  165.09, 160.78 (d,  $J_{\text{C-F}} = 248.5$  Hz), 149.39 (d,  $J_{\text{C-F}} = 2.6$  Hz), 146.94, 137.86 (d,  $J_{\text{C-F}} = 5.5$  Hz), 132.04 (d,  $J_{\text{C-F}} = 9.1$  Hz), 127.59 (d,  $J_{\text{C-F}} = 10.2$  Hz), 124.02, 121.98 (d,  $J_{\text{C-F}} = 25.6$  Hz), 111.87 (d,  $J_{\text{C-F}} = 21.7$  Hz), 61.66, 14.30; **HRMS** for  $\text{C}_{12}\text{H}_{10}\text{FNO}_2$ : calcd. (M+H) $^+$ : 220.0768, found: 220.0772

**Ethyl 7-nitroquinoline-3-carboxylate (3i)**

Yellow solid; isolated yield 76% (37 mg).  $R_f$  0.50 (20% EtOAc/hexane); Mp 159-160 °C;  $^1\text{H NMR}$  (400 MHz,  $\text{CDCl}_3$ )  $\delta$  9.51 (s, 1H), 8.97 (s, 1H), 8.85 (s, 1H), 8.32 (d,  $J = 7.7$  Hz, 1H), 8.04 (d,  $J = 8.9$  Hz, 1H), 4.44 (q,  $J = 7.1$  Hz, 2H), 1.40 (t,  $J = 7.1$  Hz, 3H);  $^{13}\text{C NMR}$  (100 MHz,  $\text{CDCl}_3$ )  $\delta$  164.48, 152.18, 149.41, 148.86, 138.21, 130.73, 129.99, 125.87, 125.65, 120.91, 62.11, 14.30; **HRMS** for  $\text{C}_{12}\text{H}_{10}\text{N}_2\text{O}_4$ : calcd. (M+H) $^+$ : 247.0713, found: 247.0706

**Ethyl thieno[3,2-b]pyridine-6-carboxylate (3j)**

White solid; isolated yield 38% (16 mg).  $R_f$  0.50 (20% EtOAc/hexane); Mp 88-90 °C;  $^1\text{H NMR}$  (400 MHz,  $\text{CDCl}_3$ )  $\delta$  9.23 (d,  $J = 1.8$  Hz, 1H), 8.78 (d,  $J = 1.8$  Hz, 1H), 7.89 (d,  $J = 5.5$  Hz, 1H), 7.57 (d,  $J = 5.6$  Hz, 1H), 4.39 (q,  $J = 7.2$  Hz, 2H), 1.38 (t,  $J = 7.2$  Hz, 3H);  $^{13}\text{C}$

**NMR** (100 MHz, CDCl<sub>3</sub>)  $\delta$  165.46, 158.50, 148.35, 134.77, 132.29, 125.17, 121.33, 61.52, 14.34; **HRMS** for C<sub>10</sub>H<sub>9</sub>NO<sub>2</sub>S: calcd. (M+H)<sup>+</sup>: 208.0427, found: 208.0423

### **3-(Phenylsulfonyl)quinoline (3k)**<sup>10</sup>

White solid; isolated yield 81% (22 mg). *R<sub>f</sub>* 0.50 (20% EtOAc/hexane); Mp 151-153 °C; **<sup>1</sup>H NMR** (400 MHz, CDCl<sub>3</sub>)  $\delta$  9.21 (d, *J* = 2.3 Hz, 1H), 8.75 (d, *J* = 2.0 Hz, 1H), 8.10 (d, *J* = 8.4 Hz, 1H), 7.96-7.98 (m, 2H), 7.90 (d, *J* = 8.3 Hz, 1H), 7.79-7.83 (m, 1H), 7.60-7.64 (m, 1H), 7.45-7.56 (m, 3H); **<sup>13</sup>C NMR** (100 MHz, CDCl<sub>3</sub>)  $\delta$  149.40, 147.14, 141.04, 136.91, 134.76, 133.74, 132.78, 129.67, 129.60, 129.19, 128.38, 127.83, 126.39; **HRMS** for C<sub>15</sub>H<sub>11</sub>NO<sub>2</sub>S: calcd. (M+H)<sup>+</sup>: 270.0583, found: 270.0588

### **7-Methyl-3-(phenylsulfonyl)quinoline (3l)**

White solid; isolated yield 84% (24 mg). *R<sub>f</sub>* 0.50 (20% EtOAc/hexane); Mp 161-163 °C; **<sup>1</sup>H NMR** (400 MHz, CDCl<sub>3</sub>)  $\delta$  9.16 (d, *J* = 2.3 Hz, 1H), 8.68 (d, *J* = 2.1 Hz, 1H), 7.94-7.96 (m, 2H), 7.86 (s, 1H), 7.78 (d, *J* = 8.4 Hz, 1H), 7.43-7.54 (m, 4H), 2.53 (s, 3H); **<sup>13</sup>C NMR** (100 MHz, CDCl<sub>3</sub>)  $\delta$  149.65, 147.19, 143.92, 141.24, 136.56, 133.87, 133.62, 130.67, 129.55, 128.77, 128.64, 127.75, 124.45, 22.17; **HRMS** for C<sub>16</sub>H<sub>13</sub>NO<sub>2</sub>S: calcd. (M+H)<sup>+</sup>: 284.0740, found: 284.0745

### **3-(Phenylsulfonyl)-7-(trifluoromethoxy)-1,2-dihydroquinoline (3o)**

White solid; isolated yield 22% (15 mg). *R<sub>f</sub>* 0.50 (20% EtOAc/hexane); Mp 139-140 °C; **<sup>1</sup>H NMR** (400 MHz, CDCl<sub>3</sub>)  $\delta$  9.24 (d, *J* = 2.2 Hz, 1H), 8.78 (d, *J* = 1.9 Hz, 1H), 7.94-7.99 (m, 4H), 7.47-7.58 (m, 4H); **<sup>13</sup>C NMR** (100 MHz, CDCl<sub>3</sub>)  $\delta$  152.01, 149.98, 148.42, 140.73, 136.56, 135.28, 133.95, 131.13, 129.70, 127.86, 124.54, 122.29, 119.02; **HRMS** for C<sub>16</sub>H<sub>12</sub>F<sub>3</sub>NO<sub>3</sub>S: calcd. (M+H)<sup>+</sup>: 354.0406, found: 354.0409

### **1-(Quinolin-3-yl)propan-1-one (3p)**

White solid; isolated yield 89% (16 mg). *R<sub>f</sub>* 0.50 (20% EtOAc/hexane); Mp 138-139 °C; **<sup>1</sup>H NMR** (400 MHz, CDCl<sub>3</sub>)  $\delta$  9.38 (d, *J* = 2.2 Hz, 1H), 8.66 (d, *J* = 1.9 Hz, 1H), 8.10 (d, *J* = 8.2 Hz, 1H), 7.89 (dd, *J* = 8.1 Hz, 1.1 Hz, 1H), 7.75-7.79 (m, 1H), 7.55-7.59 (m, 1H), 3.09 (q, *J* = 7.2 Hz, 2H), 1.24 (t, *J* = 7.2 Hz, 3H); **<sup>13</sup>C NMR** (100 MHz, CDCl<sub>3</sub>)  $\delta$  199.48, 149.77, 149.13, 136.87, 131.89, 129.45, 129.34, 129.13, 127.53, 126.96, 32.26, 8.03; **HRMS** for C<sub>12</sub>H<sub>11</sub>NO: calcd. (M+H)<sup>+</sup>: 186.0913, found: 186.0911

### **1-(7-Methylquinolin-3-yl)propan-1-one (3q)**

White solid; isolated yield 90% (17 mg). *R<sub>f</sub>* 0.50 (20% EtOAc/hexane); Mp 126-127 °C; **<sup>1</sup>H NMR** (500 MHz, CDCl<sub>3</sub>)  $\delta$  9.33 (s, 1H), 8.61 (s, 1H), 7.86 (s, 1H), 7.77 (d, *J* = 8.3 Hz, 1H), 7.39 (d, *J* = 8.2 Hz, 1H), 3.06 (q, *J* = 7.1 Hz, 2H), 2.53 (s, 3H), 1.23 (t, *J* = 7.2 Hz, 3H); **<sup>13</sup>C NMR** (100 MHz, CDCl<sub>3</sub>)  $\delta$  199.49, 149.98, 149.19, 142.84, 136.58, 129.83, 128.97, 128.51,

128.44, 124.98, 32.17, 22.14, 8.06; **HRMS** for C<sub>13</sub>H<sub>13</sub>NO: calcd. (M+H)<sup>+</sup>: 200.1070, found: 200.1071

**Ethyl-2-(((4-methylphenyl)sulfonamido)(phenyl)methyl)-3-phenylacrylate (4a)<sup>3</sup>**

White solid; isolated yield 62% (270 mg). The spectroscopic data matches well with the reported data.

**Ethyl (E)-2-(((4-methylphenyl)sulfonamido)(p-tolyl)methyl)-3-phenylacrylate (4b)**

White solid; isolated yield 63% (283 mg). *R<sub>f</sub>* 0.50 (20% EtOAc/hexane); **<sup>1</sup>H NMR** (500 MHz, CDCl<sub>3</sub>): δ 7.60 (s, 1H), 7.35 (d, *J* = 8.0 Hz, 2H), 7.30-7.32 (m, 3H), 7.19 (d, *J* = 9.3 Hz, 2H), 7.12 (d, *J* = 6.3 Hz, 1H), 7.03-7.07 (m, 4H), 6.27 (d, *J* = 10.4 Hz, 1H), 5.74 (d, *J* = 10.4 Hz, 1H), 4.04-4.09 (m, 2H), 2.34 (s, 3H), 2.27 (s, 3H), 1.16 (t, *J* = 7.1 Hz, 3H); **<sup>13</sup>C NMR** (100 MHz, CDCl<sub>3</sub>) δ 166.52, 142.83, 142.36, 137.87, 137.28, 136.23, 133.83, 129.49, 129.37, 129.30, 129.26, 129.00, 128.78, 127.10, 126.25, 61.14, 53.87, 21.50, 21.01, 14.09; **HRMS** for C<sub>26</sub>H<sub>27</sub>NO<sub>4</sub>S: calcd. (M+H)<sup>+</sup>: 472.1553, found: 472.1548

**Ethyl-2-((2,6-dichlorophenyl)((4-methylphenyl)sulfonamido)methyl)-3-phenylacrylate (4c)**

White solid; isolated yield 67% (337 mg). *R<sub>f</sub>* 0.50 (20% EtOAc/hexane); **<sup>1</sup>H NMR** (400 MHz, CDCl<sub>3</sub>) (*E-Z* mixture): δ 7.62-7.64 (m appearing as br d, 4H), 7.13-7.30 (m, 12H), 7.03-7.11 (m, 6H), 6.39-6.43 (m, 4H), 6.28-6.31 (m, 1H, *E*), 6.07-6.11 (m, 1H, *Z*), 5.90-5.93 (m, 1H, *E*), 5.83 (d, *J* = 2.1 Hz, 1H, *E*), 4.04-4.14 (m, 4H), 2.33 (s, 3H, *E*), 2.31 (s, 3H, *Z*), 1.21 (t, *J* = 7.2 Hz, 3H, *E*), 1.11 (t, *J* = 7.1 Hz, 3H, *Z*); **<sup>13</sup>C NMR** (100 MHz, CDCl<sub>3</sub>) δ 167.32, 165.23, 143.24, 137.71, 137.04, 134.73, 133.36, 132.54, 132.46, 131.14, 129.57, 129.24, 129.19, 128.36, 128.23, 127.22, 126.88, 126.85, 61.31, 61.16, 56.11, 54.19, 21.42, 21.39, 13.95, 13.72; **HRMS** for C<sub>25</sub>H<sub>23</sub>Cl<sub>2</sub>NO<sub>4</sub>S: calcd. (M+H)<sup>+</sup>: 504.0798, found: 504.0795

**Ethyl-2-(((4-methylphenyl)sulfonamido)(thiophen-3-yl)methyl)-3-phenylacrylate (4d)**

White solid; isolated yield 50% (220 mg). *R<sub>f</sub>* 0.50 (20% EtOAc/hexane); **<sup>1</sup>H NMR** (400 MHz, CDCl<sub>3</sub>) (*E-Z* mixture): δ 7.66 (d, *J* = 8.2 Hz, 2H, *Z*), 7.54 (s, 1H, *E*), 7.30-7.35 (m, 6H), 7.11-7.20 (m, 7H), 7.02-7.08 (m, 6H), 6.95-6.96 (m, 1H, *E*), 6.86-6.90 (m, 2H), 6.53 (s, 1H, *Z*), 6.32 (d, *J* = 10.3 Hz, 1H, *E*), 5.94 (d, *J* = 9.6 Hz, 1H, *Z*), 5.71 (d, *J* = 10.4 Hz, 1H, *E*), 5.22 (d, *J* = 9.6 Hz, 1H, *Z*), 4.02-4.10 (m, 2H, *E*), 3.79-3.89 (m, 2H, *Z*), 2.32 (2s, 3H, *E*), 2.14 (s, 3H, *Z*), 1.15 (t, *J* = 7.1 Hz, 3H, *E*), 0.80 (t, *J* = 7.1 Hz, 3H, *Z*); **<sup>13</sup>C NMR** (100 MHz, CDCl<sub>3</sub>) δ 166.47, 143.38, 142.95, 141.90, 141.02, 140.01, 137.89, 137.77, 134.63, 133.72, 130.14, 129.56, 129.30, 128.98, 128.83, 128.55, 128.43, 127.88, 127.27, 127.08, 126.62, 126.40, 126.34, 126.24, 122.12, 121.71, 61.20, 60.94, 58.88, 51.33, 21.51, 21.30, 14.09, 13.39; **HRMS** for C<sub>23</sub>H<sub>23</sub>NO<sub>4</sub>S<sub>2</sub>: calcd. (M+H)<sup>+</sup>: 464.0961, found: 464.0953

**Ethyl-3-(2,4-dimethylphenyl)-2-(((4-methylphenyl)sulfonamido)(phenyl)methyl)acrylate (4e)**

White solid; isolated yield 58% (268 mg).  $R_f$  0.50 (20% EtOAc/hexane);  $^1\text{H NMR}$  (400 MHz,  $\text{CDCl}_3$ ) (*E-Z* mixture):  $\delta$  7.75 (s, 1H, *E*), 7.68 (d,  $J = 8.2$  Hz, 2H, *E*), 7.35 (d,  $J = 8.2$  Hz, 2H, *E*), 7.26 (d,  $J = 7.3$  Hz, 2H, *Z*), 7.16-7.23 (m, 8H), 7.11 (d,  $J = 8.0$  Hz, 2H, *Z*), 7.00 (d,  $J = 8.1$  Hz, 2H, *Z*), 6.98 (s, 1H, *Z*), 6.84-6.91 (m, 3H), 6.74 (d,  $J = 9.2$  Hz, 2H, *E*), 6.41 (d,  $J = 7.7$  Hz, 1H, *Z*), 6.26 (d,  $J = 10.3$  Hz, 1H, *E*), 5.94 (d,  $J = 9.2$  Hz, 1H, *Z*), 5.67 (d,  $J = 10.3$  Hz, 1H, *E*), 5.28 (d,  $J = 9.2$  Hz, 1H, *Z*), 4.04-4.12 (m, 2H, *E*), 3.72 (q,  $J = 7.1$  Hz, 2H, *Z*), 2.29 (s, 3H, *E*), 2.27 (s, 3H, *E*), 2.22, 2.21 (2 s merged, 6H, *Z*), 2.10 (s, 3H, *E*), 2.07 (s, 3H, *Z*), 1.13 (t,  $J = 7.1$  Hz, 3H, *E*), 0.68 (t,  $J = 7.1$  Hz, 3H, *Z*);  $^{13}\text{C NMR}$  (100 MHz,  $\text{CDCl}_3$ )  $\delta$  167.46, 166.73, 143.32, 142.81, 141.42, 139.77, 139.54, 138.83, 138.74, 138.16, 138.07, 137.95, 137.30, 135.54, 131.82, 131.21, 131.04, 130.35, 130.06, 129.61, 129.49, 129.31, 128.52, 128.45, 128.00, 127.85, 127.69, 127.35, 127.19, 126.97, 126.89, 126.47, 126.34, 125.77, 61.40, 61.14, 60.64, 53.96, 21.47, 21.37, 21.29, 21.14, 19.83, 19.79, 14.07, 13.33; **HRMS** for  $\text{C}_{27}\text{H}_{29}\text{NO}_4\text{S}$ : calcd. (M+H) $^+$ : 464.1890, found: 464.1896

**Ethyl-3-(2,4-dimethylphenyl)-2-(((4-methylphenyl)sulfonamido)(p-tolyl)methyl) acrylate (4f)**

White solid; isolated yield 46% (219 mg).  $R_f$  0.50 (20% EtOAc/hexane);  $^1\text{H NMR}$  (400 MHz,  $\text{CDCl}_3$ ) (*E-Z* mixture):  $\delta$  7.73 (s, 1H, *E*), 7.67 (d,  $J = 8.1$  Hz, 2H, *Z*), 7.34 (d,  $J = 8.1$  Hz, 2H, *E*), 7.08-7.13 (m, 6H), 6.97-7.02 (m, 7H), 6.73-6.89 (m, 5H), 6.41 (d,  $J = 7.7$  Hz, 1H, *Z*), 6.24 (d,  $J = 10.1$  Hz, 1H, *E*), 5.87 (d,  $J = 9.4$  Hz, 1H, *Z*), 5.62 (d,  $J = 10.3$  Hz, 1H, *E*), 5.23 (d,  $J = 9.2$  Hz, 1H, *Z*), 4.03-4.11 (m, 2H, *E*), 3.72 (q,  $J = 7.1$  Hz, 2H, *Z*), 2.29 (s, 3H, *E*), 2.26 (s, 3H, *E*), 2.22 (s, 9H, *Z*), 2.21 (s, 3H, *E*), 2.09 (s, 3H, *Z*), 2.06 (s, 3H, *E*), 1.14 (t,  $J = 7.1$  Hz, 3H, *E*), 0.69 (t,  $J = 7.1$  Hz, 3H, *Z*);  $^{13}\text{C NMR}$  (100 MHz,  $\text{CDCl}_3$ )  $\delta$  167.48, 166.78, 143.26, 142.74, 141.23, 139.48, 138.61, 138.10, 138.07, 137.99, 137.41, 137.29, 137.03, 136.76, 135.77, 135.53, 131.92, 131.18, 130.32, 130.09, 129.58, 129.53, 129.27, 129.21, 129.16, 128.01, 127.87, 127.21, 126.98, 126.86, 126.38, 126.26, 125.74, 61.18, 61.09, 60.59, 53.78, 21.47, 21.37, 21.28, 21.13, 21.01, 20.99, 19.83, 19.79, 14.10, 13.35; **HRMS** for  $\text{C}_{28}\text{H}_{31}\text{NO}_4\text{S}$ : calcd. (M+H) $^+$ : 500.1866, found: 500.1873

**Ethyl-3-(2,4-dimethylphenyl)-2-(((4-methylphenyl)sulfonamido)(thiophen-3-yl) methyl) acrylate (4g)**

White solid; isolated yield 39% (183 mg).  $R_f$  0.50 (20% EtOAc/hexane);  $^1\text{H NMR}$  (400 MHz,  $\text{CDCl}_3$ ) (*E-Z* mixture):  $\delta$  7.67-7.69 (m, 3H), 7.35 (d,  $J = 8.2$  Hz, 2H, *E*), 6.87-7.17 (m, 14H), 6.74 (d,  $J = 7.9$  Hz, 1H, *Z*), 6.72 (s, 1H, *Z*), 6.36 (d,  $J = 7.8$  Hz, 1H, *Z*), 6.29 (d,  $J = 10.2$  Hz,



1H, *E*), 6.02 (d, *J* = 9.5 Hz, 1H, *Z*), 5.61 (d, *J* = 10.2 Hz, 1H, *E*), 5.27 (d, *J* = 9.6 Hz, 1H, *Z*), 4.04-4.16 (m, 2H, *E*), 3.72-3.80 (m, 2H, *Z*), 2.28, 2.30 (2s, 6H, *E*), 2.21, 2.22 (2s, 6H, *Z*), 2.09 (s, 3H, *Z*), 2.06 (s, 3H, *E*), 1.16 (t, *J* = 7.1 Hz, 3H, *E*), 0.72 (t, *J* = 7.1 Hz, 3H, *Z*); <sup>13</sup>C NMR (100 MHz, CDCl<sub>3</sub>) δ 167.50, 166.72, 143.35, 142.85, 141.46, 140.98, 140.58, 139.53, 138.54, 138.24, 138.08, 137.89, 137.17, 135.52, 131.69, 131.19, 130.71, 130.37, 129.98, 129.65, 129.62, 129.32, 127.99, 127.19, 126.94, 126.88, 126.65, 126.43, 126.31, 126.00, 125.77, 121.95, 121.62, 61.16, 60.68, 58.57, 51.17, 21.48, 21.38, 21.29, 21.14, 19.82, 19.77, 14.10, 13.36; **HRMS** for C<sub>25</sub>H<sub>27</sub>NO<sub>4</sub>S<sub>2</sub>: calcd. (M+Na)<sup>+</sup>: 492.1274, found: 492.1276

**Ethyl-3-(4-isopropylphenyl)-2-(((4-methylphenyl)sulfonamido)(p-tolyl)methyl)acrylate (4h)**

White solid; isolated yield 52% (255 mg). *R<sub>f</sub>* 0.50 (20% EtOAc/hexane); <sup>1</sup>H NMR (400 MHz, CDCl<sub>3</sub>) (*E-Z* mixture): δ 7.63 (d, *J* = 8.2 Hz, 2H, *Z*), 7.53 (s, 1H, *E*), 7.33 (d, *J* = 8.2 Hz, 2H, *E*), 7.20 (d, *J* = 7.9 Hz, 2H, *E*), 7.10-7.14 (m, 4H), 6.97-7.04 (m, 12H), 6.83 (d, *J* = 8.1 Hz, 2H, *Z*), 6.47 (s, 1H, *Z*), 6.29 (d, *J* = 10.4 Hz, 1H, *E*), 5.88 (d, *J* = 9.4 Hz, 1H, *Z*), 5.76 (d, *J* = 10.4 Hz, 1H, *E*), 5.17 (d, *J* = 9.4 Hz, 1H, *Z*), 3.97-4.05 (m, 2H, *E*), 3.78-3.86 (m, 2H, *Z*), 2.76-2.86 (m, 2H), 2.31 (s, 3H, *E*), 2.24 (s, 3H, *E*), 2.20 (s, 3H, *Z*), 2.10 (s, 3H, *Z*), 1.19 (s, 3H, *E*), 1.17 (s, 3H, *E*), 1.15 (s, 3H, *Z*), 1.13 (s, 3H, *Z*), 1.11 (t, *J* = 7.2 Hz, 3H, *E*), 0.79 (t, *J* = 7.2 Hz, 3H, *Z*); <sup>13</sup>C NMR (100 MHz, CDCl<sub>3</sub>) δ 167.97, 166.67, 150.71, 149.57, 143.23, 142.81, 142.58, 137.98, 137.93, 137.87, 137.42, 137.23, 136.34, 135.43, 132.16, 131.30, 129.68, 129.53, 129.32, 129.30, 129.23, 129.17, 128.71, 128.31, 127.27, 127.14, 126.91, 126.48, 126.34, 125.93, 61.61, 61.06, 60.81, 54.00, 34.00, 33.94, 31.69, 23.88, 23.84, 23.81, 23.79, 21.53, 21.27, 21.03, 14.11, 13.44; **HRMS** for C<sub>29</sub>H<sub>33</sub>NO<sub>4</sub>S: calcd. (M+Na)<sup>+</sup>: 514.2023, found: 514.2027

**Ethyl 2-phenyl-1-tosyl-1,2-dihydroquinoline-3-carboxylate (5a)**

White solid; isolated yield 62% (30 mg). *R<sub>f</sub>* 0.50 (20% EtOAc/hexane); Mp 99-100 °C <sup>1</sup>H NMR (400 MHz, CDCl<sub>3</sub>) δ 7.62 (d, *J* = 8.0 Hz, 1H), 7.07-7.29 (m, 11H), 6.99 (d, *J* = 8.2 Hz, 2H), 6.44 (s, 1H), 4.13 (q, *J* = 7.1 Hz, 2H), 2.27 (s, 3H), 1.20 (t, *J* = 7.1 Hz, 3H); <sup>13</sup>C NMR (100 MHz, CDCl<sub>3</sub>) δ 164.59, 143.78, 137.38, 135.75, 134.12, 133.41, 130.71, 129.15, 128.38, 128.29, 128.12, 128.02, 127.84, 127.45, 127.22, 126.98, 126.81, 60.97, 55.90, 21.53, 14.28; **HRMS** for C<sub>25</sub>H<sub>23</sub>NO<sub>4</sub>S: calcd. (M+H)<sup>+</sup>: 434.1421, found: 434.1418

**Ethyl 2-(p-tolyl)-1-tosyl-1,2-dihydroquinoline-3-carboxylate (5b)**

White solid; isolated yield 69% (62 mg). *R<sub>f</sub>* 0.50 (20% EtOAc/hexane); Mp 128-129 °C; <sup>1</sup>H NMR (400 MHz, CDCl<sub>3</sub>) δ 7.61 (d, *J* = 8.1 Hz, 1H), 7.26-7.28 (m, 1H), 7.21-7.24 (m, 2H), 7.14 (s, 1H), 7.08-7.13 (m, 2H), 7.06 (br d, *J* = 7.9 Hz, 2H), 6.99 (d, *J* = 8.0 Hz, 2H), 6.93 (d,

$J = 8.0$  Hz, 2H), 6.40 (s, 1H), 4.12 (q,  $J = 7.1$  Hz, 2H), 2.27 (s, 3H), 2.17 (s, 3H), 1.20 (t,  $J = 7.1$  Hz, 3H);  $^{13}\text{C}$  NMR (100 MHz,  $\text{CDCl}_3$ )  $\delta$  164.59, 143.71, 137.79, 135.81, 134.31, 134.12, 133.26, 130.65, 129.13, 129.10, 128.23, 128.15, 127.99, 127.51, 126.76, 60.93, 55.74, 21.52, 21.04, 14.28; HRMS for  $\text{C}_{26}\text{H}_{25}\text{NO}_4\text{S}$ : calcd. (M+H) $^+$ : 448.1577, found: 448.1576

**Ethyl 2-(2,6-dichlorophenyl)-1-tosyl-1,2-dihydroquinoline-3-carboxylate (5c)**

White solid; isolated yield 56% (44 mg).  $R_f$  0.50 (20% EtOAc/hexane); Mp 147-148 °C;  $^1\text{H}$  NMR (400 MHz,  $\text{CDCl}_3$ )  $\delta$  7.60 (d,  $J = 8.1$  Hz, 1H), 7.30-7.34 (m, 3H), 7.18-7.22 (m, 2H), 7.12-7.16 (m, 2H), 7.00-7.06 (m, 4H), 4.00-4.08 (m, 2H), 2.28 (s, 3H), 1.11 (t,  $J = 7.1$  Hz, 3H);  $^{13}\text{C}$  NMR (100 MHz,  $\text{CDCl}_3$ )  $\delta$  164.51, 143.94, 136.76, 136.40, 135.59, 135.31, 135.04, 130.93, 129.65, 129.30, 128.16, 127.57, 127.43, 126.64, 126.28, 124.87, 60.92, 54.53, 21.56, 14.06; HRMS for  $\text{C}_{25}\text{H}_{21}\text{Cl}_2\text{NO}_4\text{S}$ : calcd. (M+H) $^+$ : 502.0641, found: 502.0643

**Ethyl 2-(thiophen-3-yl)-1-tosyl-1,2-dihydroquinoline-3-carboxylate (5d)**

White solid; isolated yield 40% (21 mg).  $R_f$  0.50 (20% EtOAc/hexane); Mp 130-132 °C;  $^1\text{H}$  NMR (400 MHz,  $\text{CDCl}_3$ )  $\delta$  7.66 (d,  $J = 8.1$  Hz, 1H), 7.28-7.32 (m, 1H), 7.22 (d,  $J = 8.3$  Hz, 2H), 7.13-7.16 (m, 1H), 7.06-7.09 (m, 3H), 6.99 (d,  $J = 8.1$  Hz, 2H), 6.94 (dd,  $J = 5.0$  Hz, 1.1 Hz, 1H), 6.86 (t,  $J = 1.4$  Hz, 1H), 6.46 (s, 1H), 4.12-4.18 (m, 2H), 2.27 (s, 3H), 1.22 (t,  $J = 7.1$  Hz, 3H);  $^{13}\text{C}$  NMR (100 MHz,  $\text{CDCl}_3$ )  $\delta$  164.45, 143.82, 138.71, 135.77, 134.31, 132.84, 130.78, 129.17, 128.41, 128.20, 127.90, 126.95, 126.83, 126.80, 125.91, 122.91, 60.99, 52.68, 21.52, 14.31; HRMS for  $\text{C}_{23}\text{H}_{21}\text{NO}_4\text{S}_2$ : calcd. (M+H) $^+$ : 440.0985, found: 440.0976

**Ethyl 5,7-dimethyl-2-phenyl-1-tosyl-1,2-dihydroquinoline-3-carboxylate (5e)**

White solid; isolated yield 61% (28 mg).  $R_f$  0.50 (20% EtOAc/hexane); Mp 129-130 °C;  $^1\text{H}$  NMR (400 MHz,  $\text{CDCl}_3$ )  $\delta$  7.31 (s, 1H), 7.29 (br s, 1H), 7.21-7.25 (m, 2H), 7.10-7.17 (m, 4H), 6.99 (d,  $J = 8.0$  Hz, 2H), 6.77 (s, 1H), 6.40 (s, 1H), 4.13 (q,  $J = 7.1$  Hz, 2H), 2.28 (s, 3H), 2.23 (s, 3H), 2.20 (s, 3H), 1.20 (t,  $J = 7.1$  Hz, 3H);  $^{13}\text{C}$  NMR (100 MHz,  $\text{CDCl}_3$ )  $\delta$  164.90, 143.61, 140.73, 137.59, 135.98, 135.80, 134.23, 130.72, 129.51, 129.01, 128.28, 127.83, 127.20, 127.01, 126.50, 126.17, 123.59, 60.84, 55.25, 21.68, 21.54, 18.91, 14.33; HRMS for  $\text{C}_{27}\text{H}_{27}\text{NO}_4\text{S}$ : calcd. (M+H) $^+$ : 462.1734, found: 462.1736

**Ethyl 5,7-dimethyl-2-(p-tolyl)-1-tosyl-1,2-dihydroquinoline-3-carboxylate (5f)**

White solid; isolated yield 56% (32 mg).  $R_f$  0.50 (20% EtOAc/hexane); Mp 90-91 °C;  $^1\text{H}$  NMR (400 MHz,  $\text{CDCl}_3$ )  $\delta$  7.30 (s, 1H), 7.27 (s, 1H), 7.22 (d,  $J = 8.3$  Hz, 2H), 7.07 (d,  $J = 8.0$  Hz, 2H), 6.99 (d,  $J = 8.0$  Hz, 2H), 6.93 (d,  $J = 8.0$  Hz, 2H), 6.77 (s, 1H), 6.36 (s, 1H), 4.12 (q,  $J = 7.1$  Hz, 2H), 2.27 (s, 3H), 2.23 (s, 3H), 2.20 (s, 3H), 2.17 (s, 3H), 1.20 (t,  $J = 7.1$  Hz, 3H);  $^{13}\text{C}$  NMR (100 MHz,  $\text{CDCl}_3$ )  $\delta$  164.91, 143.56, 140.64, 137.56, 136.02, 135.74, 134.51, 134.22, 130.59, 129.47, 129.02, 128.99, 127.14, 127.00, 126.53, 126.30, 123.63, 60.80,

55.09, 21.68, 21.53, 21.05, 18.91, 14.33; **HRMS** for C<sub>28</sub>H<sub>29</sub>NO<sub>4</sub>S: calcd. (M+H)<sup>+</sup>: 476.1890, found: 476.1890

**Ethyl 7-isopropyl-2-(p-tolyl)-1-tosyl-1,2-dihydroquinoline-3-carboxylate (5g)**

White solid; isolated yield 47% (28 mg). *R<sub>f</sub>* 0.50 (20% EtOAc/hexane); Mp 98-99 °C; **<sup>1</sup>H NMR** (400 MHz, CDCl<sub>3</sub>) δ 7.48 (s, 1H), 7.19-7.21 (m, 2H), 7.13 (br s, 1H), 7.07 (br d, *J* = 8.1 Hz, 2H), 6.93-6.98 (m, 6H), 6.39 (s, 1H), 4.11 (q, *J* = 7.1 Hz, 2H), 2.78-2.88 (m, 1H), 2.26 (s, 3H), 2.17 (s, 3H), 1.16-1.19 (m, 9H); **<sup>13</sup>C NMR** (100 MHz, CDCl<sub>3</sub>) δ 164.81, 152.22, 143.59, 137.63, 135.82, 134.76, 134.08, 133.36, 129.08, 129.05, 128.21, 127.20, 127.00, 126.64, 126.23, 125.10, 124.79, 60.80, 55.82, 34.17, 23.75, 23.47, 21.51, 21.06, 14.29; **HRMS** for C<sub>29</sub>H<sub>31</sub>NO<sub>4</sub>S: calcd. (M+H)<sup>+</sup>: 490.2047, found: 490.2045

**Ethyl 5,7-dimethyl-2-(thiophen-3-yl)-1-tosyl-1,2-dihydroquinoline-3-carboxylate (5h)**

White solid; isolated yield 57% (31 mg). *R<sub>f</sub>* 0.50 (20% EtOAc/hexane); Mp 135-136 °C; **<sup>1</sup>H NMR** (400 MHz, CDCl<sub>3</sub>) δ 7.33 (br s, 1H), 7.21-7.23 (m, 3H), 7.07 (dd, *J* = 5.0 Hz, 3.0 Hz, 1H), 6.99 (d, *J* = 8.0 Hz, 2H), 6.93 (dd, *J* = 5.0 Hz, 1.2 Hz, 1H), 6.84 (m, 1H), 6.79 (br s, 1H), 6.42 (s, 1H), 4.11-4.19 (m, 2H), 2.26, 2.27 (2s, 6H), 2.19 (s, 3H), 1.22 (t, *J* = 7.1 Hz, 3H); **<sup>13</sup>C NMR** (100 MHz, CDCl<sub>3</sub>) δ 164.73, 143.66, 140.80, 138.95, 135.98, 135.92, 134.44, 130.11, 129.52, 129.03, 126.99, 126.90, 126.57, 126.28, 125.68, 123.32, 122.73, 60.86, 52.21, 21.71, 21.53, 18.91, 14.36; **HRMS** for C<sub>25</sub>H<sub>25</sub>NO<sub>4</sub>S<sub>2</sub>: calcd. (M+H)<sup>+</sup>: 468.1298, found: 468.1288

#### 4. References

- (1) K. H. Kim, S. H. Kim, H. J. Lee and J. N. Kim, *Adv. Synth. Catal.*, 2013, **355**, 1977.
- (2) D. Y. Park, M. J. Lee, T. H. Kim and J. N. Kim, *Tetrahedron Lett.*, 2005, **46**, 8799.
- (3) J. M. Kim, S. H. Kim and J. N. Kim, *Bull. Korean Chem. Soc.*, 2008, **29**, 1583.
- (4) E. Tang, D. Mao, W. Li, Z. Gao and P. Yao, *Heterocycles*, 2012, **85**, 667.
- (5) J. N. Kim, H. J. Lee, K. Y. Lee and H. S. Kim, *Tetrahedron Lett.*, 2001, **42**, 3737.
- (6) H. S. Kim, H. S. Lee and J. N. Kim, *Bull. Korean Chem. Soc.*, 2009, **30**, 941.
- (7) M. J. Lee, S. C. Kim and J. N. Kim, *Bull. Korean Chem. Soc.*, 2006, **27**, 439.
- (8) Q. Niu, H. Mao, G. Yuan, J. Gao, H. Liu, Y. Tu, X. Wang and X. Lv, *Adv. Synth. Catal.*, 2013, **355**, 1185.
- (9) H. Venkatesan, F. M. Hocutt, T. K. Jones and M. H. Rabinowitz, *J. Org. Chem.*, **2010**, **75**, 3488.
- (10) M. J. Cabrera-Afonso, Z.-P. Lu, C. B. Kelly, S. B. Lang, R. Dykstra, O. Gutierrez and G. A. Molander, *Chem. Sci.*, 2018, **9**, 3186.

#### 5. <sup>1</sup>H & <sup>13</sup>C NMR Spectra of Products

NRAT-V-153

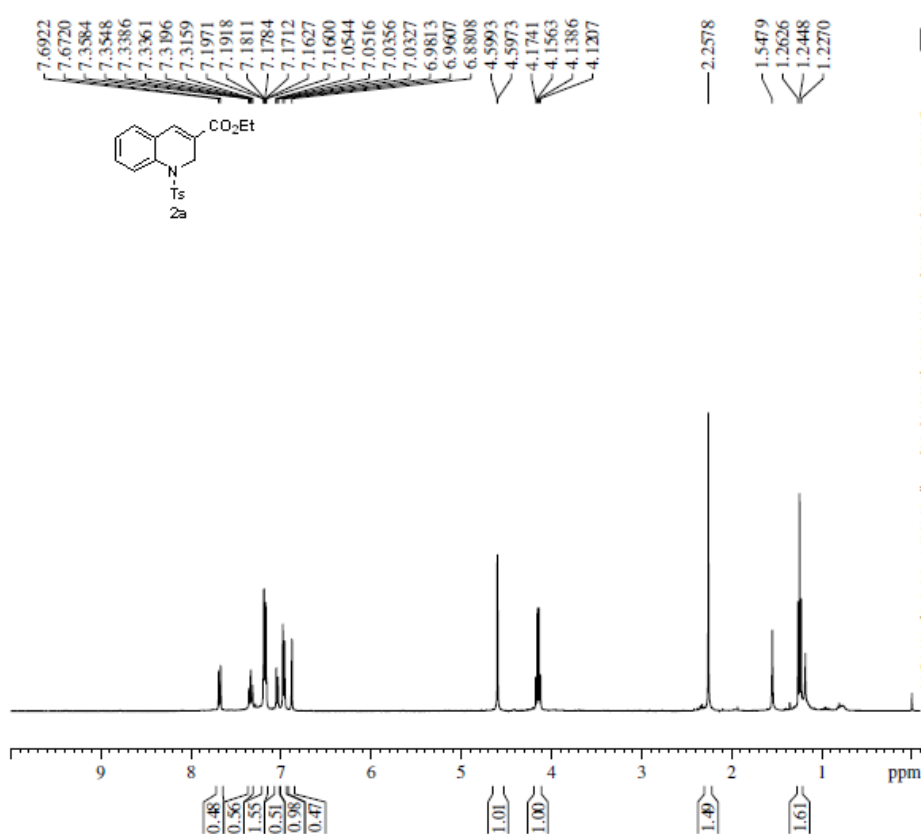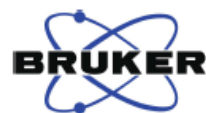

Current Data Parameters  
 NAME 22-MAY-FN-2017  
 EXPNO 320  
 PROCNO 1

F2 - Acquisition Parameters  
 Date\_ 20170522  
 Time 14.23  
 INSTRUM spect  
 PROBHD 5 mm PABBO BB/  
 PULPROG zg30  
 TD 65536  
 SOLVENT CDCl3  
 NS 8  
 DS 0  
 SWH 9615.385 Hz  
 FIDRES 0.146719 Hz  
 AQ 3.4078720 sec  
 RG 100.41  
 DW 52.000 usec  
 DE 6.50 usec  
 TE 296.9 K  
 D1 1.00000000 sec  
 TDO 1

==== CHANNEL f1 ====  
 SFO1 400.1629712 MHz  
 NUC1 1H  
 P1 13.20 usec  
 PLW1 13.00000000 W

F2 - Processing parameters  
 SI 65536  
 SF 400.1605378 MHz  
 WDW EM  
 SSB 0  
 LB 0.30 Hz  
 GB 0  
 PC 1.00

Figure 1: <sup>1</sup>H NMR spectrum of 2a

NRAT-V-153

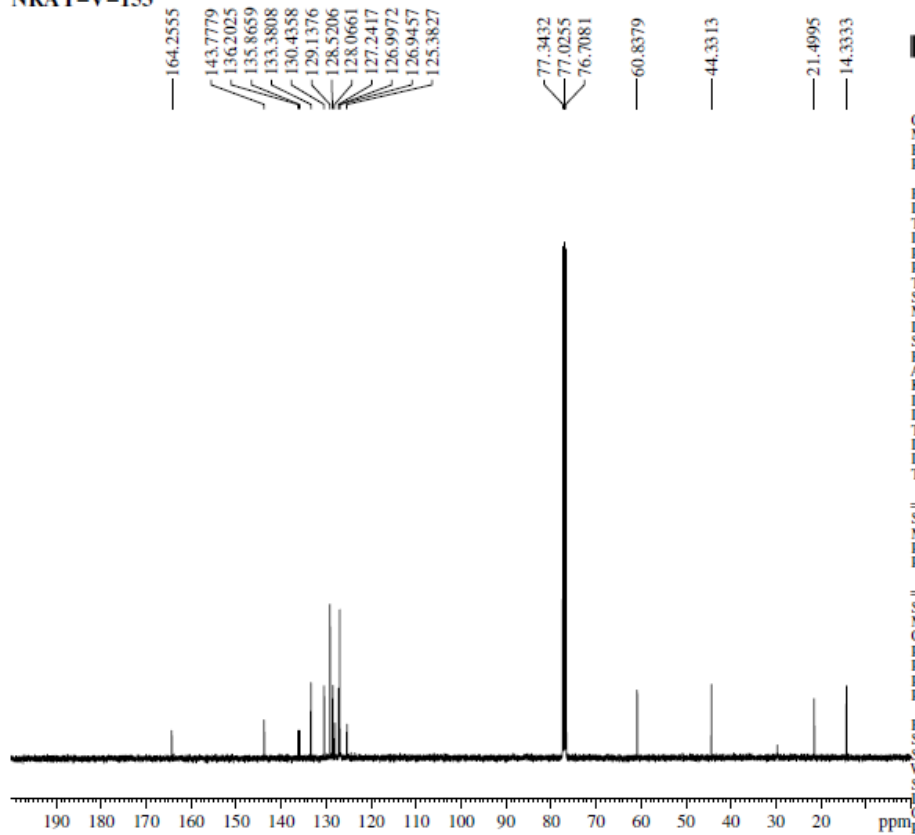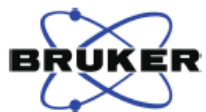

Current Data Parameters  
 NAME 22-MAY-FN-2017  
 EXPNO 340  
 PROCNO 1

F2 - Acquisition Parameters  
 Date\_ 20170522  
 Time 19.49  
 INSTRUM spect  
 PROBHD 5 mm PABBO BB/  
 PULPROG zgpg30  
 TD 65536  
 SOLVENT CDCl3  
 NS 512  
 DS 0  
 SWH 24038.461 Hz  
 FIDRES 0.366798 Hz  
 AQ 1.3631488 sec  
 RG 201.48  
 DW 20.800 usec  
 DE 6.50 usec  
 TE 299.1 K  
 D1 2.00000000 sec  
 D11 0.03000000 sec  
 TDO 1

==== CHANNEL f1 ====  
 SFO1 100.6304993 MHz  
 NUC1 13C  
 P1 9.90 usec  
 PLW1 53.00000000 W

==== CHANNEL f2 ====  
 SFO2 400.1621006 MHz  
 NUC2 1H  
 CPDPRG2 waltz16  
 PCPD2 90.00 usec  
 PLW2 13.00000000 W  
 PLW12 0.27963999 W  
 PLW13 0.22651000 W

F2 - Processing parameters  
 SI 32768  
 SF 100.6204380 MHz  
 WDW EM  
 SSB 0  
 LB 1.00 Hz  
 GB 0  
 PC 1.40

Figure 2: <sup>13</sup>C NMR spectrum of 2a

NRAT V 188

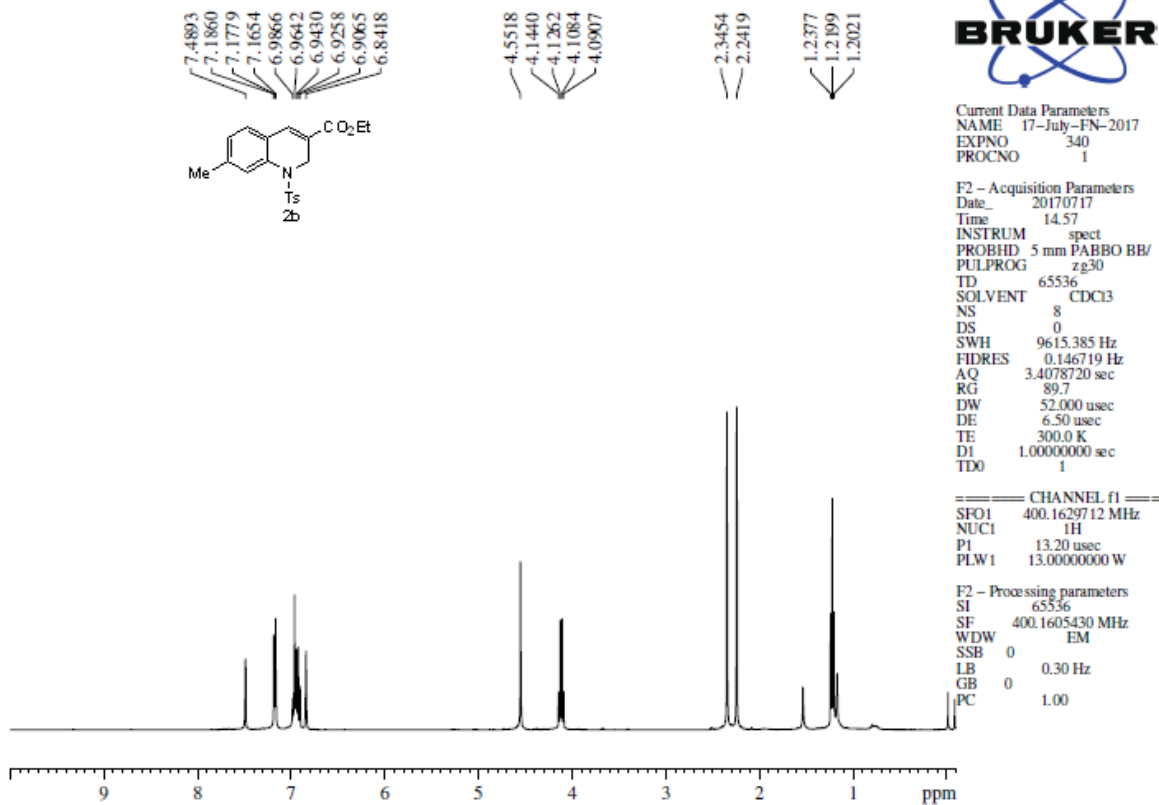

Figure 3: <sup>1</sup>H NMR spectrum of 2b

NRAT-V-188

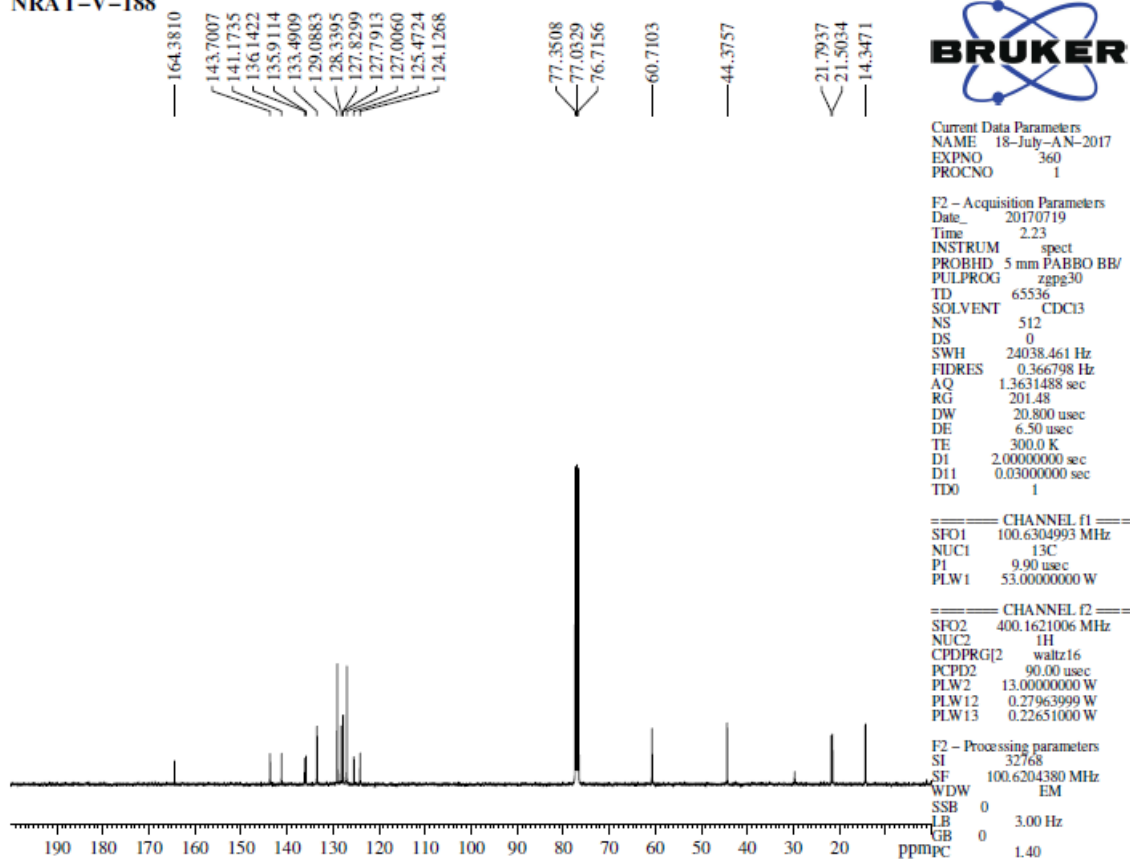

Figure 4: <sup>13</sup>C NMR spectrum of 2b

NRAT-VI-12

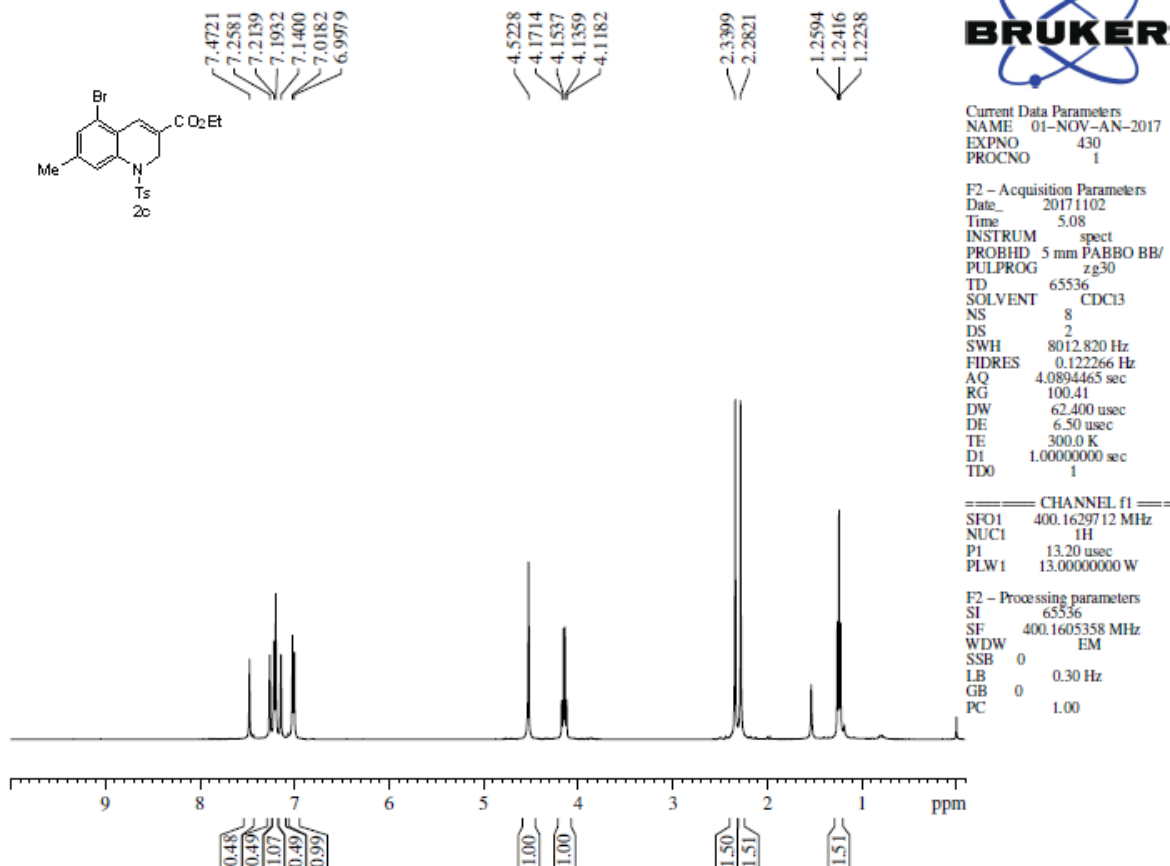

Figure 5: <sup>1</sup>H NMR spectrum of 2c

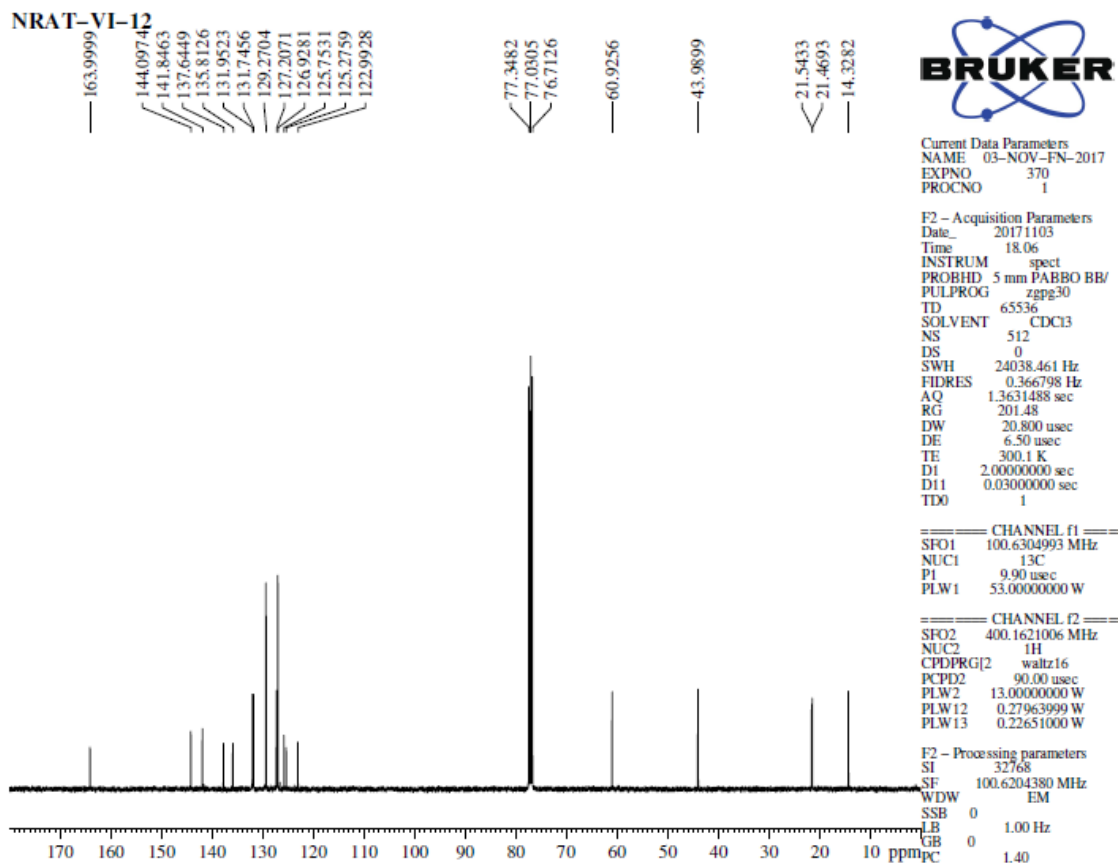

Figure 6: <sup>13</sup>C NMR spectrum of 2c

NRAT-V-172

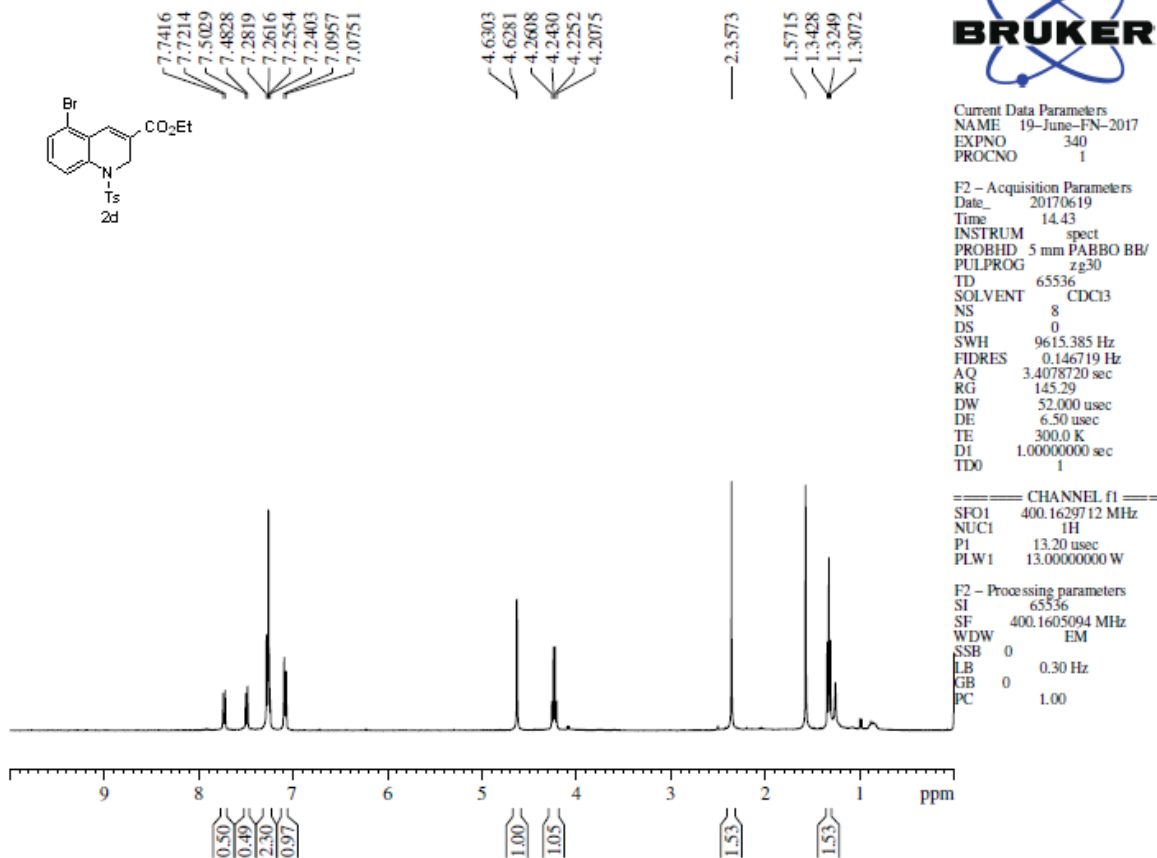

Figure 7: <sup>1</sup>H NMR spectrum of 2d

NRAT-V-172

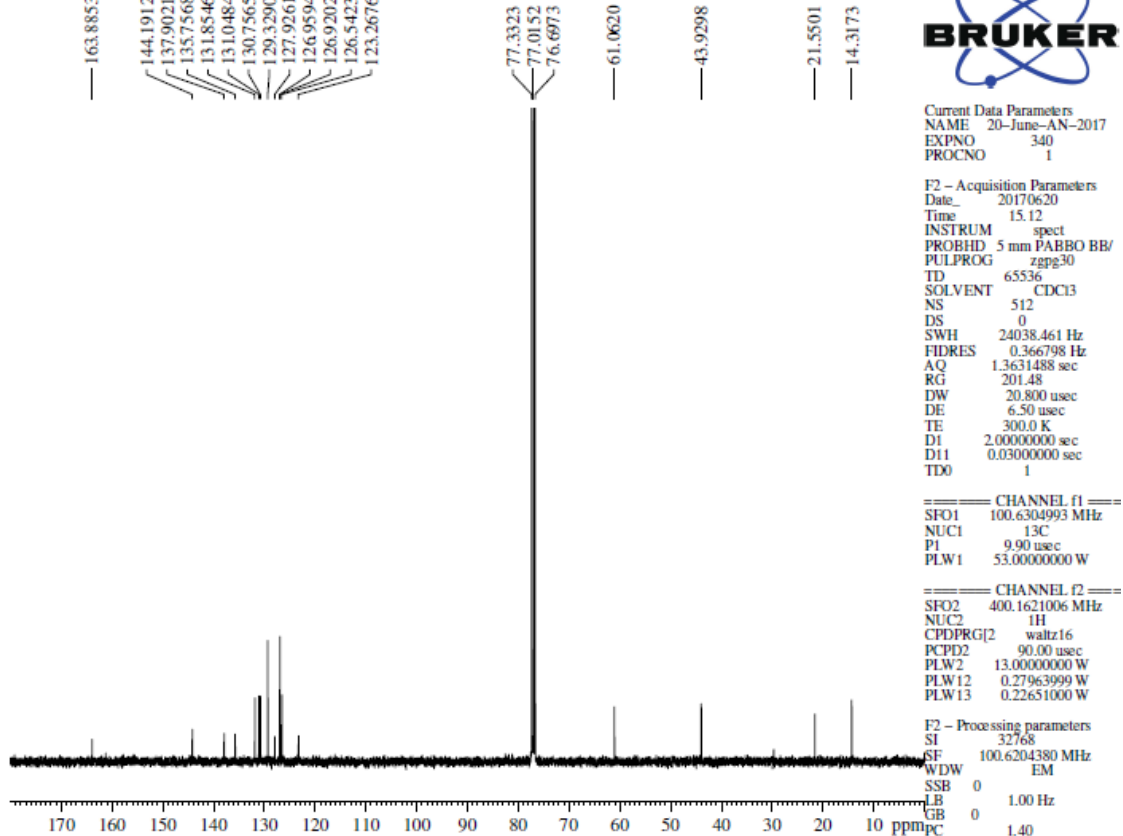

Figure 8: <sup>13</sup>C NMR spectrum of 2d

NRAT-V-191

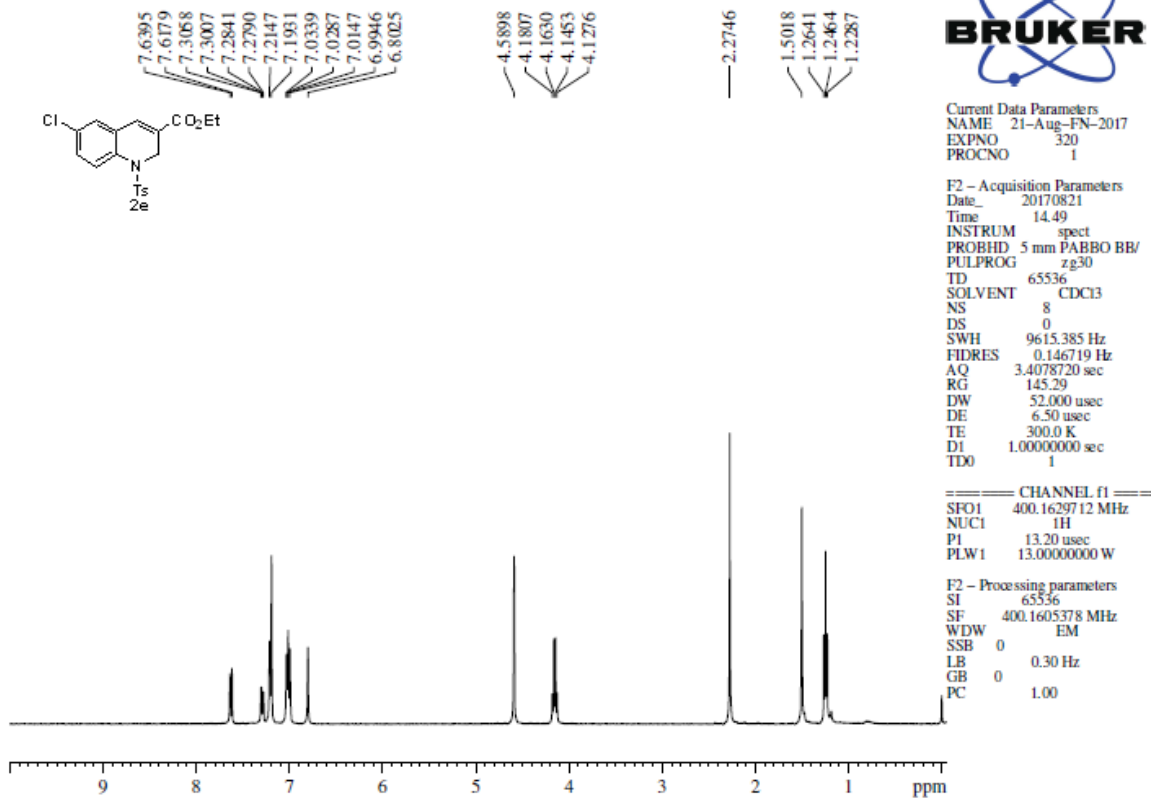

Figure 9: <sup>1</sup>H NMR spectrum of 2e

NRAT-V-191

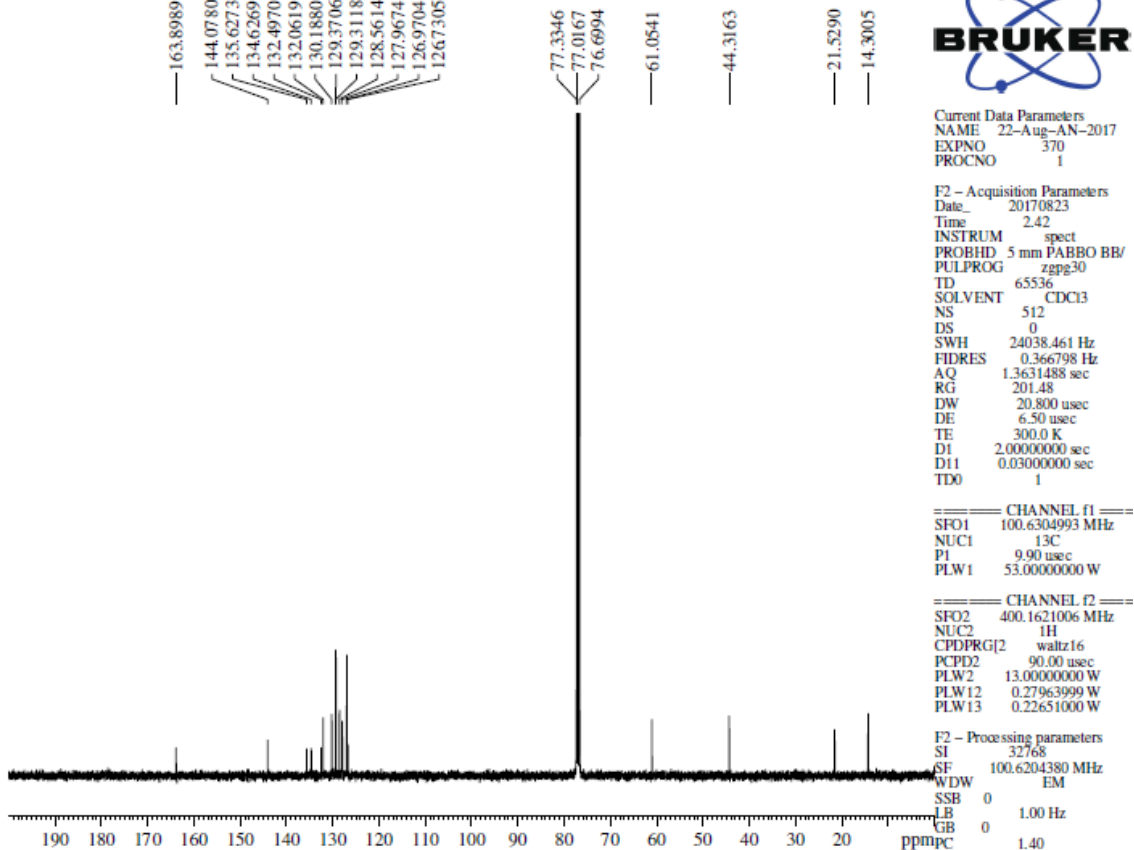

Figure 10: <sup>13</sup>C NMR spectrum of 2e



NRAT-V-193

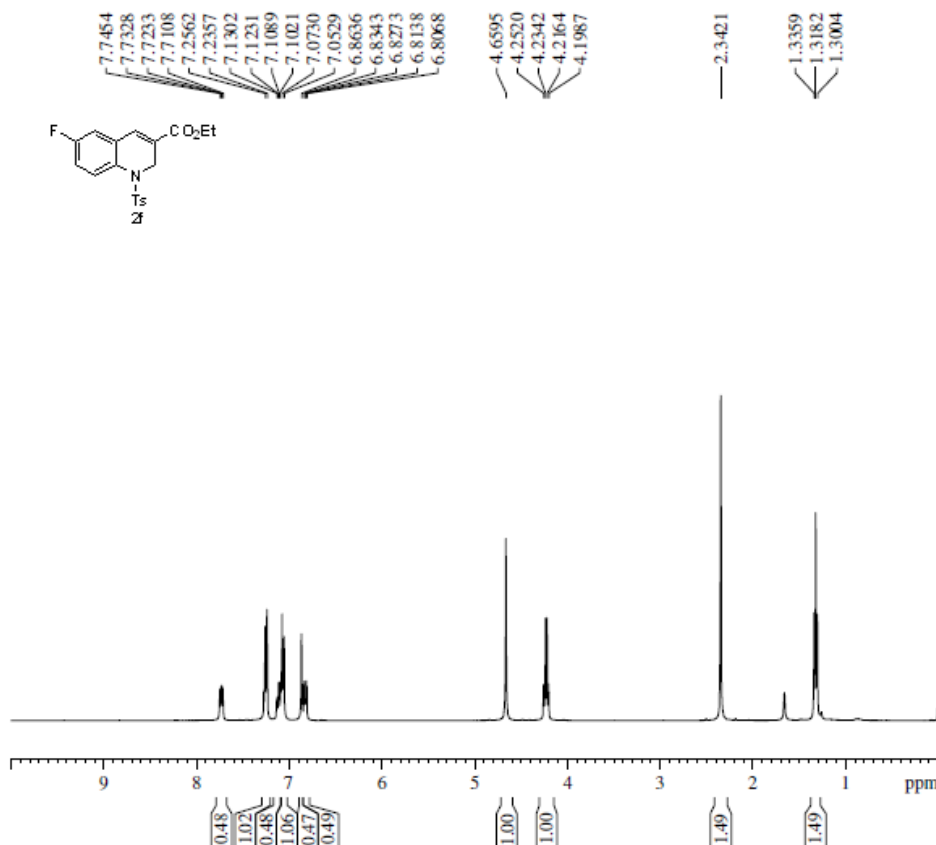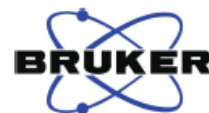

Current Data Parameters  
 NAME 21-Aug-FN-2017  
 EXPNO 330  
 PROCNO 1

F2 - Acquisition Parameters  
 Date\_ 20170821  
 Time 14.53  
 INSTRUM spect  
 PROBHD 5 mm PABBO BB/  
 PULPROG zg30  
 TD 65536  
 SOLVENT CDCl3  
 NS 8  
 DS 0  
 SWH 9615.385 Hz  
 FIDRES 0.146719 Hz  
 AQ 3.4078720 sec  
 RG 73.53  
 DW 52.000 usec  
 DE 6.50 usec  
 TE 300.0 K  
 D1 1.00000000 sec  
 TD0 1

==== CHANNEL f1 ====  
 SFO1 400.1629712 MHz  
 NUC1 1H  
 P1 13.20 usec  
 PLW1 13.00000000 W

F2 - Processing parameters  
 SI 65536  
 SF 400.1605061 MHz  
 WDW EM  
 SSB 0  
 LB 0.30 Hz  
 GB 0  
 PC 1.00

Figure 11: <sup>1</sup>H NMR spectrum of 2f

NRAT-V-193

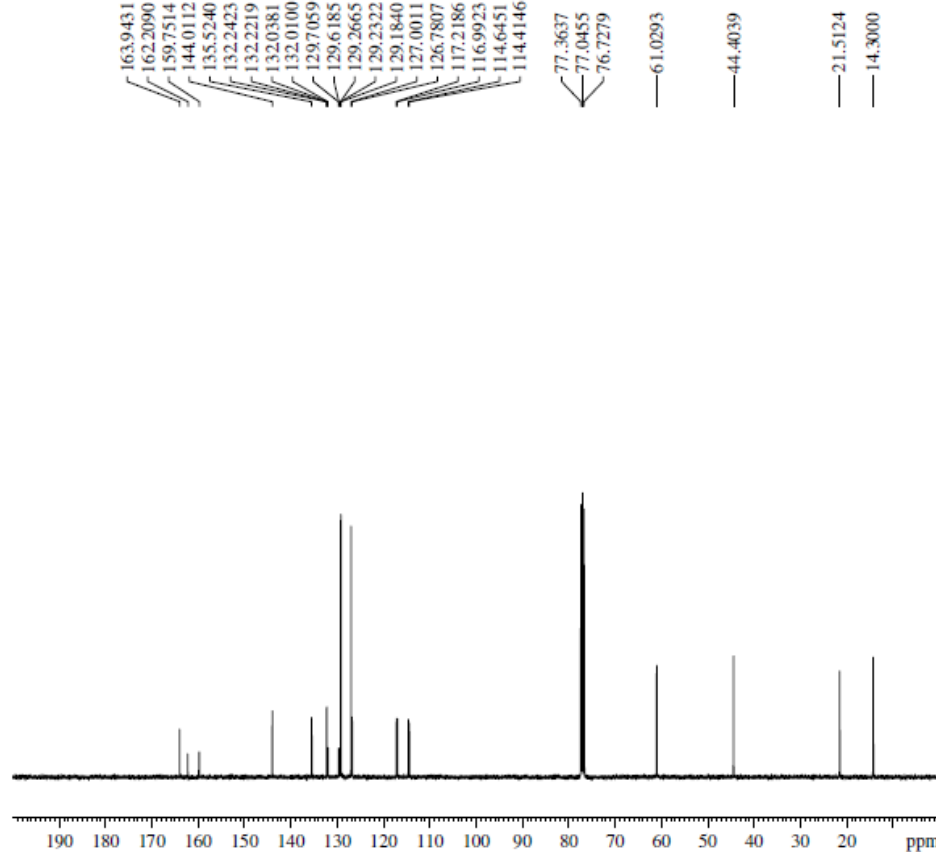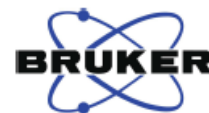

Current Data Parameters  
 NAME 22-Aug-AN-2017  
 EXPNO 380  
 PROCNO 1

F2 - Acquisition Parameters  
 Date\_ 20170823  
 Time 3.14  
 INSTRUM spect  
 PROBHD 5 mm PABBO BB/  
 PULPROG zgpg30  
 TD 65536  
 SOLVENT CDCl3  
 NS 512  
 DS 9  
 SWH 24038.461 Hz  
 FIDRES 0.366798 Hz  
 AQ 1.3631488 sec  
 RG 201.48  
 DW 20.800 usec  
 DE 6.50 usec  
 TE 300.0 K  
 D1 2.00000000 sec  
 D11 0.03000000 sec  
 TD0 1

==== CHANNEL f1 ====  
 SFO1 100.6304993 MHz  
 NUC1 13C  
 P1 9.90 usec  
 PLW1 53.00000000 W

==== CHANNEL f2 ====  
 SFO2 400.1621006 MHz  
 NUC2 1H  
 CPDPRG[2] waltz16  
 PCPD2 90.00 usec  
 PLW2 13.00000000 W  
 PLW12 0.27963999 W  
 PLW13 0.22651000 W

F2 - Processing parameters  
 SI 32768  
 SF 100.6204380 MHz  
 WDW EM  
 SSB 0  
 LB 1.00 Hz  
 GB 0  
 PC 1.40

Figure 12: <sup>13</sup>C NMR spectrum of 2f

NRAT-VI-26

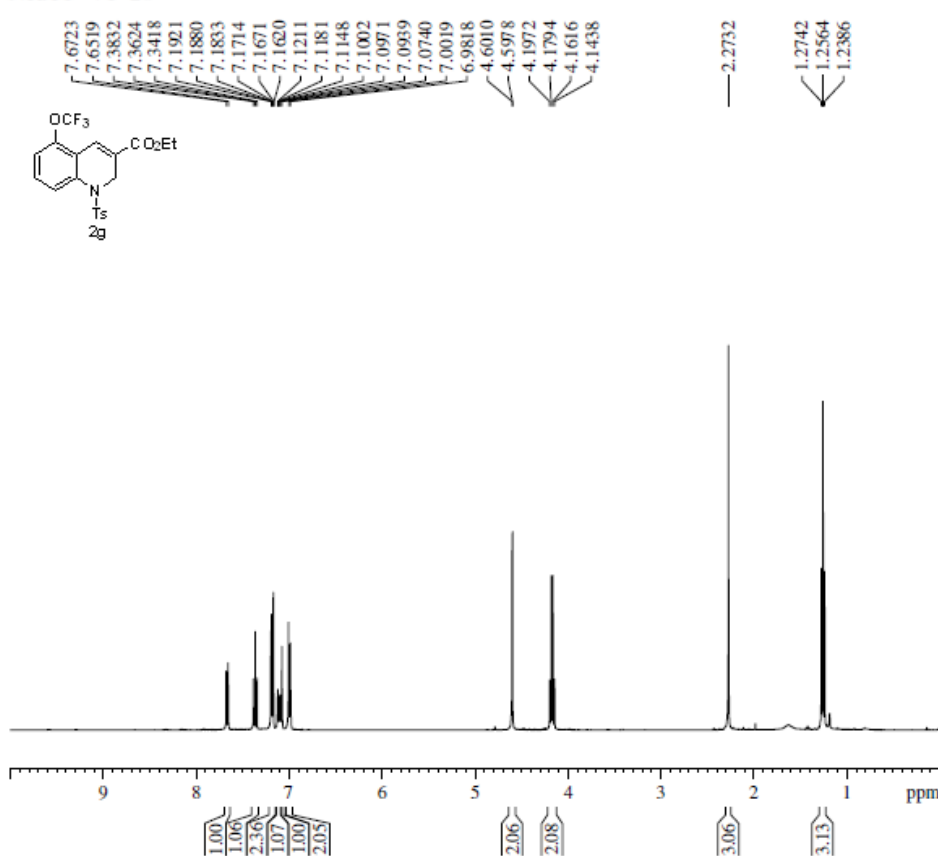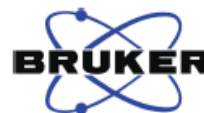

Current Data Parameters  
 NAME 19-Mar-FN-2018  
 EXPNO 390  
 PROCNO 1

F2 - Acquisition Parameters  
 Date\_ 20180319  
 Time 16.21  
 INSTRUM spect  
 PROBHD 5 mm PABBO BB/  
 PULPROG zg30  
 TD 65536  
 SOLVENT CDCl3  
 NS 8  
 DS 0  
 SWH 9615.385 Hz  
 FIDRES 0.146719 Hz  
 AQ 3.4078720 sec  
 RG 114.26  
 DW 52.000 usec  
 DE 6.50 usec  
 TE 300.0 K  
 D1 1.00000000 sec  
 TD0 1

==== CHANNEL f1 ====  
 SFO1 400.1629712 MHz  
 NUC1 1H  
 P1 13.20 usec  
 PLW1 13.00000000 W

F2 - Processing parameters  
 SI 65536  
 SF 400.1605366 MHz  
 WDW EM  
 SSB 0  
 LB 0.30 Hz  
 GB 0  
 PC 1.00

Figure 13: <sup>1</sup>H NMR spectrum of 2g

NRAT-VI-26

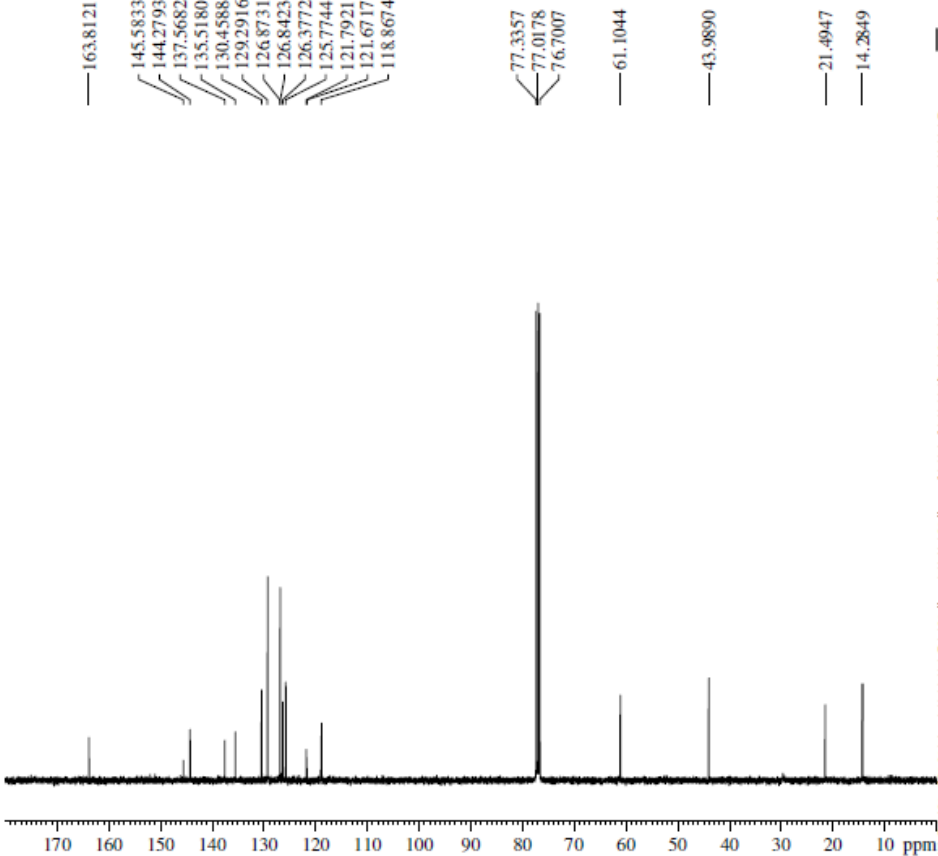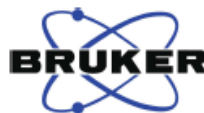

Current Data Parameters  
 NAME 17-Nov-AN-2017  
 EXPNO 350  
 PROCNO 1

F2 - Acquisition Parameters  
 Date\_ 20171118  
 Time 11.17  
 INSTRUM spect  
 PROBHD 5 mm PABBO BB/  
 PULPROG zgpg30  
 TD 65536  
 SOLVENT CDCl3  
 NS 512  
 DS 0  
 SWH 24038.461 Hz  
 FIDRES 0.366798 Hz  
 AQ 1.3631488 sec  
 RG 201.48  
 DW 20.800 usec  
 DE 6.50 usec  
 TE 300.0 K  
 D1 2.00000000 sec  
 D11 0.03000000 sec  
 TD0 1

==== CHANNEL f1 ====  
 SFO1 100.6304993 MHz  
 NUC1 13C  
 P1 9.90 usec  
 PLW1 53.00000000 W

==== CHANNEL f2 ====  
 SFO2 400.1621006 MHz  
 NUC2 1H  
 CPDPRG2 waltz16  
 PCPD2 90.00 usec  
 PLW2 13.00000000 W  
 PLW12 0.27963999 W  
 PLW13 0.22651000 W

F2 - Processing parameters  
 SI 32768  
 SF 100.6204380 MHz  
 WDW EM  
 SSB 0  
 LB 1.00 Hz  
 GB 0  
 PC 1.40

Figure 14: <sup>13</sup>C NMR spectrum of 2g

NRAT-V-205

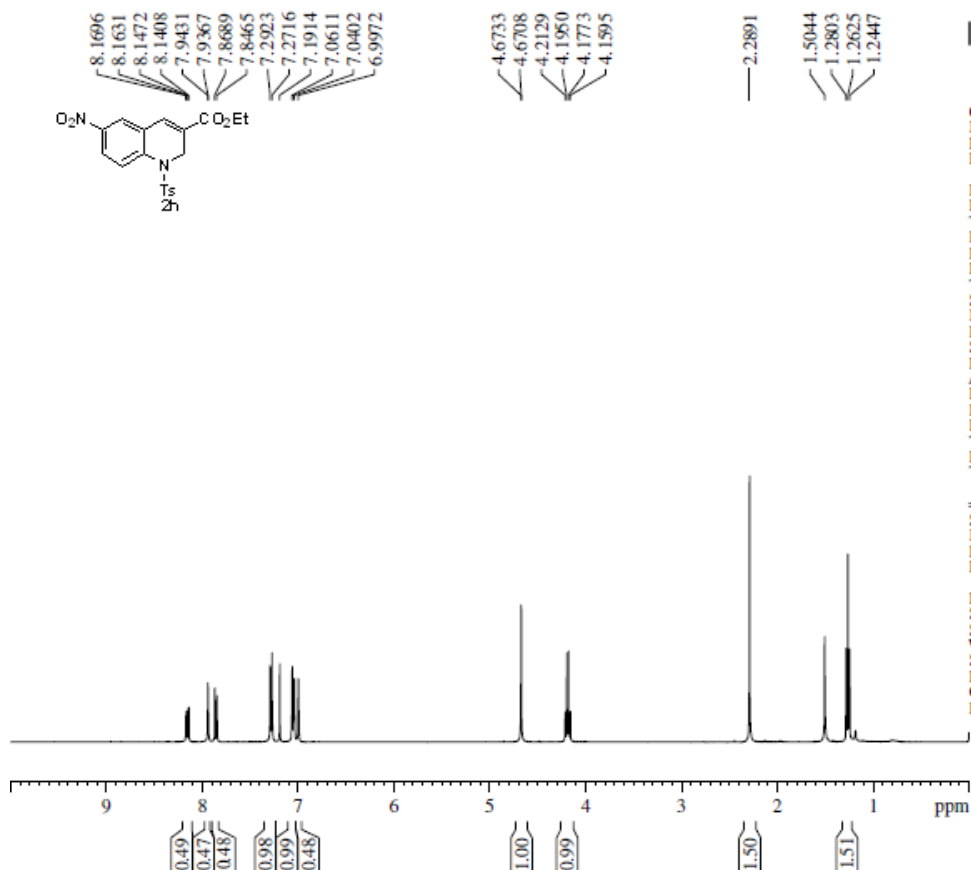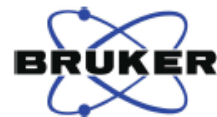

Current Data Parameters  
 NAME: 21-Aug-FN-2017  
 EXPNO: 340  
 PROCNO: 1

F2 - Acquisition Parameters  
 Date\_: 20170821  
 Time: 14.58  
 INSTRUM: spect  
 PROBHD: 5 mm PABBO BB/  
 PULPROG: zg30  
 TD: 65536  
 SOLVENT: CDCl3  
 NS: 8  
 DS: 0  
 SWH: 9615.385 Hz  
 FIDRES: 0.146719 Hz  
 AQ: 3.4078720 sec  
 RG: 145.29  
 DW: 52.000 usec  
 DE: 6.50 usec  
 TE: 300.0 K  
 D1: 1.00000000 sec  
 TDO: 1

==== CHANNEL f1 ====  
 SFO1: 400.1629712 MHz  
 NUC1: 1H  
 P1: 13.20 usec  
 PLW1: 13.00000000 W

F2 - Processing parameters  
 SI: 65536  
 SF: 400.1605376 MHz  
 WDW: EM  
 SSB: 0  
 LB: 0.30 Hz  
 GB: 0  
 PC: 1.00

Figure 15: <sup>1</sup>H NMR spectrum of 2h

NRAT-V-205

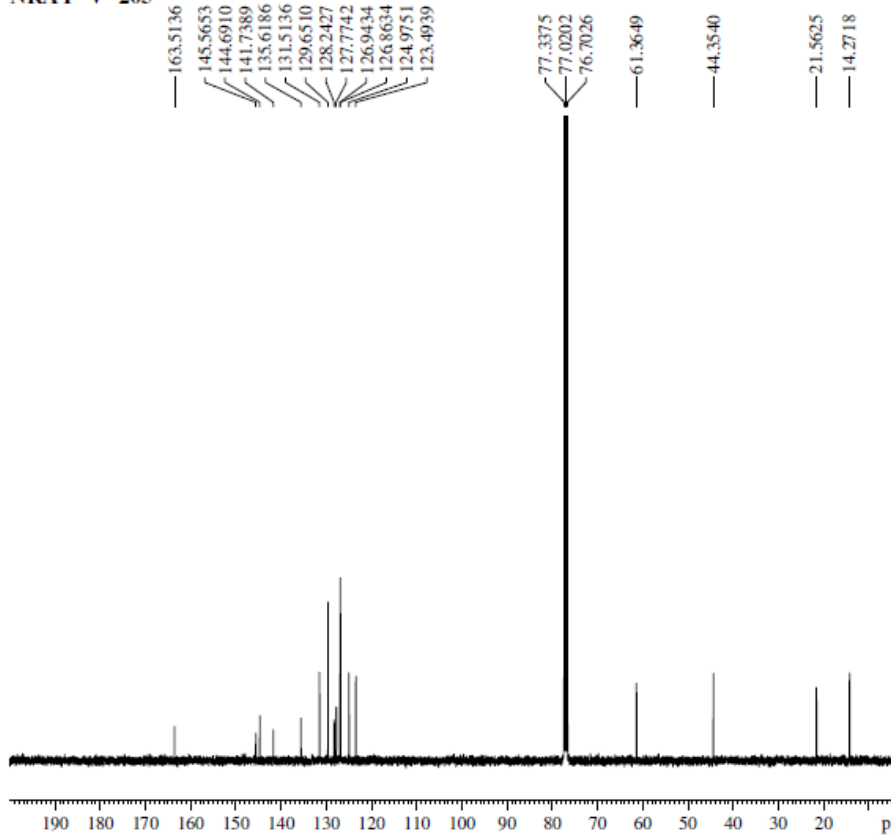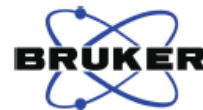

Current Data Parameters  
 NAME: 22-Aug-AN-2017  
 EXPNO: 400  
 PROCNO: 1

F2 - Acquisition Parameters  
 Date\_: 20170823  
 Time: 4.20  
 INSTRUM: spect  
 PROBHD: 5 mm PABBO BB/  
 PULPROG: zgpg30  
 TD: 65536  
 SOLVENT: CDCl3  
 NS: 512  
 DS: 0  
 SWH: 24038.461 Hz  
 FIDRES: 0.366798 Hz  
 AQ: 1.3631488 sec  
 RG: 201.48  
 DW: 20.800 usec  
 DE: 6.50 usec  
 TE: 300.0 K  
 D1: 2.00000000 sec  
 D11: 0.03000000 sec  
 TDO: 1

==== CHANNEL f1 ====  
 SFO1: 100.6304993 MHz  
 NUC1: 13C  
 P1: 9.90 usec  
 PLW1: 53.00000000 W

==== CHANNEL f2 ====  
 SFO2: 400.1621006 MHz  
 NUC2: 1H  
 CPDPRG2: waltz16  
 PCPD2: 90.00 usec  
 PLW2: 13.00000000 W  
 PLW12: 0.27963999 W  
 PLW13: 0.22651000 W

F2 - Processing parameters  
 SI: 32768  
 SF: 100.6204380 MHz  
 WDW: EM  
 SSB: 0  
 LB: 1.00 Hz  
 GB: 0  
 PC: 1.40

Figure 16: <sup>13</sup>C NMR spectrum of 2h

NRAT-V-202

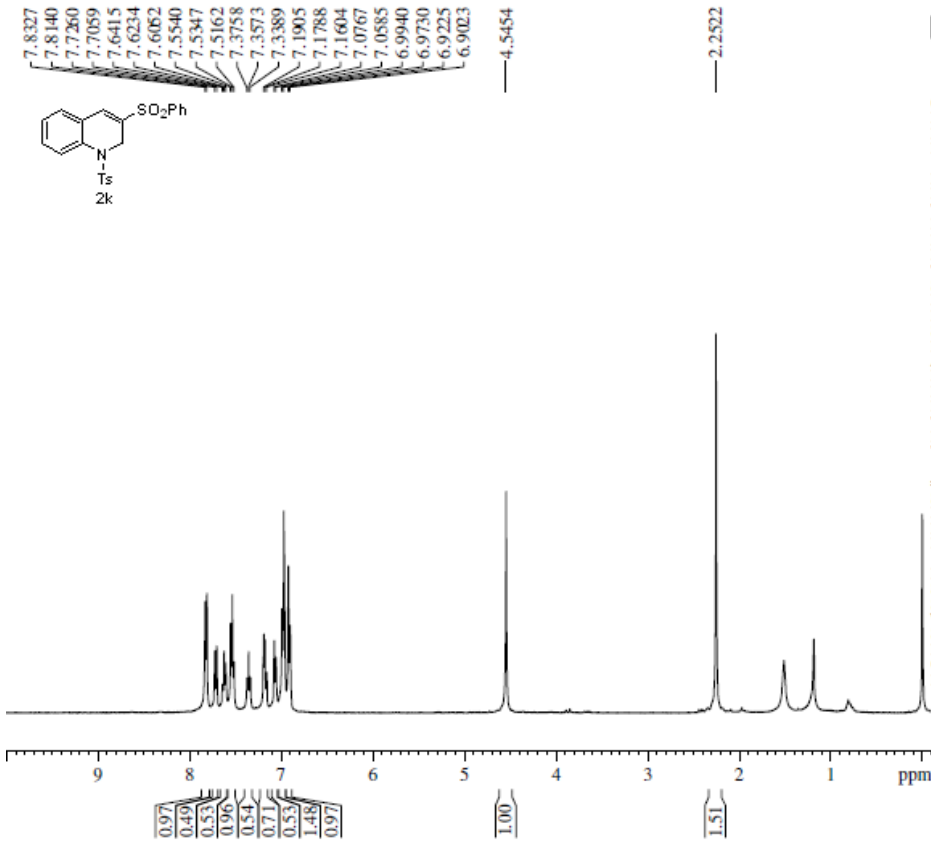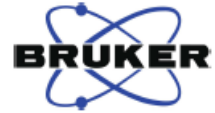

Current Data Parameters  
 NAME 10-OCT-FN-2017  
 EXPNO 390  
 PROCNO 1

F2 - Acquisition Parameters  
 Date\_ 20171010  
 Time 14.49  
 INSTRUM spect  
 PROBHD 5 mm PABBO BB/  
 PULPROG zg30  
 TD 65536  
 SOLVENT CDCl3  
 NS 8  
 DS 0  
 SWH 9615.385 Hz  
 FIDRES 0.146719 Hz  
 AQ 3.4078720 sec  
 RG 129.57  
 DW 52.000 usec  
 DE 6.50 usec  
 TE 300.0 K  
 D1 1.00000000 sec  
 TD0 1

==== CHANNEL f1 ====  
 SFO1 400.1629712 MHz  
 NUC1 1H  
 P1 13.20 usec  
 PLW1 13.00000000 W

F2 - Processing parameters  
 SI 65536  
 SF 400.1605371 MHz  
 WDW EM  
 SSB 0  
 LB 0.30 Hz  
 GB 0  
 PC 1.00

Figure 17: <sup>1</sup>H NMR spectrum of 2k

NRAT-V-202

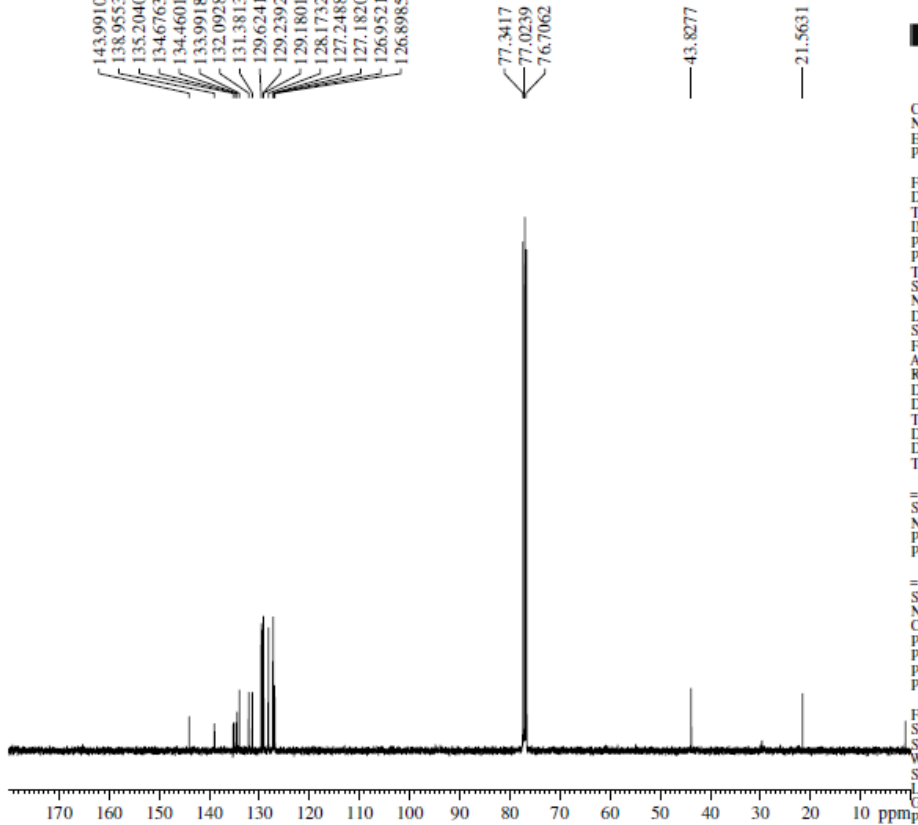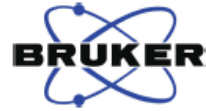

Current Data Parameters  
 NAME 23-OCT-FN-2017  
 EXPNO 340  
 PROCNO 1

F2 - Acquisition Parameters  
 Date\_ 20171023  
 Time 23.43  
 INSTRUM spect  
 PROBHD 5 mm PABBO BB/  
 PULPROG zgpg30  
 TD 65536  
 SOLVENT CDCl3  
 NS 512  
 DS 0  
 SWH 24038.461 Hz  
 FIDRES 0.366798 Hz  
 AQ 1.3631488 sec  
 RG 201.48  
 DW 20.800 usec  
 DE 6.50 usec  
 TE 300.0 K  
 D1 2.00000000 sec  
 D11 0.03000000 sec  
 TD0 1

==== CHANNEL f1 ====  
 SFO1 100.6304993 MHz  
 NUC1 13C  
 P1 9.90 usec  
 PLW1 53.00000000 W

==== CHANNEL f2 ====  
 SFO2 400.1621006 MHz  
 NUC2 1H  
 CPDPRGf2 waltz16  
 PCPD2 90.00 usec  
 PLW2 13.00000000 W  
 PLW12 0.27963999 W  
 PLW13 0.22651000 W

F2 - Processing parameters  
 SI 32768  
 SF 100.6204380 MHz  
 WDW EM  
 SSB 0  
 LB 1.00 Hz  
 GB 0  
 PC 1.40

Figure 18: <sup>13</sup>C NMR spectrum of 2k

NRAT-VI-3

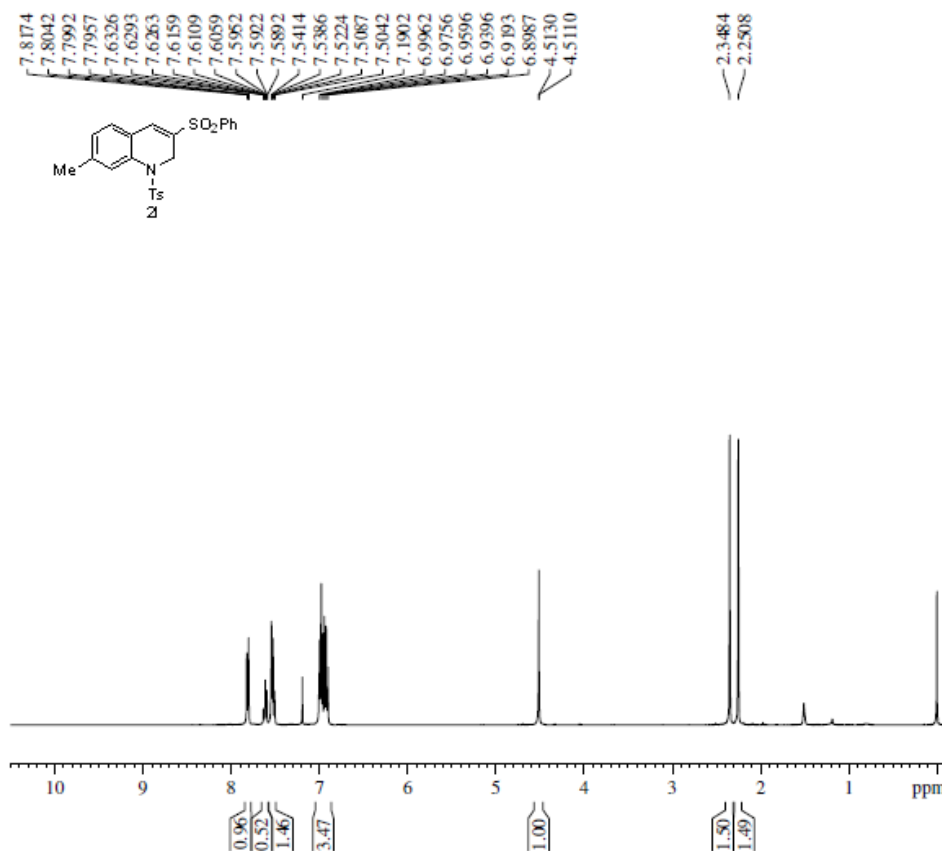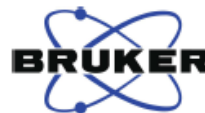

Current Data Parameters  
 NAME 06-OCT-AN-2017  
 EXPNO 450  
 PROCNO 1

F2 - Acquisition Parameters  
 Date\_ 20171006  
 Time 15.30  
 INSTRUM spect  
 PROBHD 5 mm PABBO BB/  
 PULPROG zg30  
 TD 65536  
 SOLVENT CDCl3  
 NS 8  
 DS 0  
 SWH 9615.385 Hz  
 FIDRES 0.146719 Hz  
 AQ 3.4078720 sec  
 RG 114.26  
 DW 52.000 usec  
 DE 6.50 usec  
 TE 300.0 K  
 D1 1.00000000 sec  
 TD0 1

==== CHANNEL f1 ====  
 SFO1 400.1629712 MHz  
 NUC1 1H  
 P1 13.20 usec  
 PLW1 13.00000000 W

F2 - Processing parameters  
 SI 65536  
 SF 400.1605373 MHz  
 WDW EM  
 SSB 0  
 LB 0.30 Hz  
 GB 0  
 PC 1.00

Figure 19: <sup>1</sup>H NMR spectrum of 2l

NR-AT-VI-3

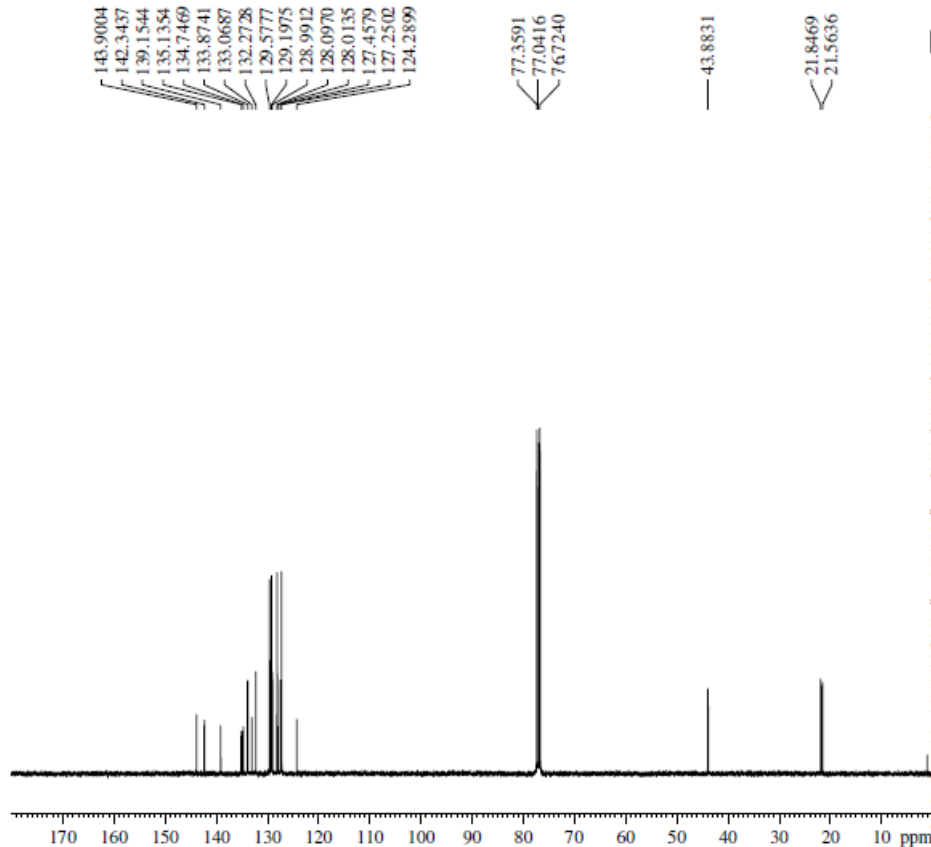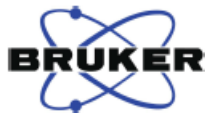

Current Data Parameters  
 NAME 10-OCT-FN-2017  
 EXPNO 340  
 PROCNO 1

F2 - Acquisition Parameters  
 Date\_ 20171011  
 Time 1.04  
 INSTRUM spect  
 PROBHD 5 mm PABBO BB/  
 PULPROG zgpg30  
 TD 65536  
 SOLVENT CDCl3  
 NS 512  
 DS 0  
 SWH 24038.461 Hz  
 FIDRES 0.366798 Hz  
 AQ 1.3631488 sec  
 RG 201.48  
 DW 20.800 usec  
 DE 6.50 usec  
 TE 300.0 K  
 D1 2.00000000 sec  
 D11 0.03000000 sec  
 TD0 1

==== CHANNEL f1 ====  
 SFO1 100.6304993 MHz  
 NUC1 13C  
 P1 9.90 usec  
 PLW1 53.00000000 W

==== CHANNEL f2 ====  
 SFO2 400.1621006 MHz  
 NUC2 1H  
 CPDPRG2 waltz16  
 PCPD2 90.00 usec  
 PLW2 13.00000000 W  
 PLW12 0.27963999 W  
 PLW13 0.22651000 W

F2 - Processing parameters  
 SI 32768  
 SF 100.6204380 MHz  
 WDW EM  
 SSB 0  
 LB 1.00 Hz  
 GB 0  
 PC 1.40

Figure 20: <sup>13</sup>C NMR spectrum of 2l

NRAT-VI-29

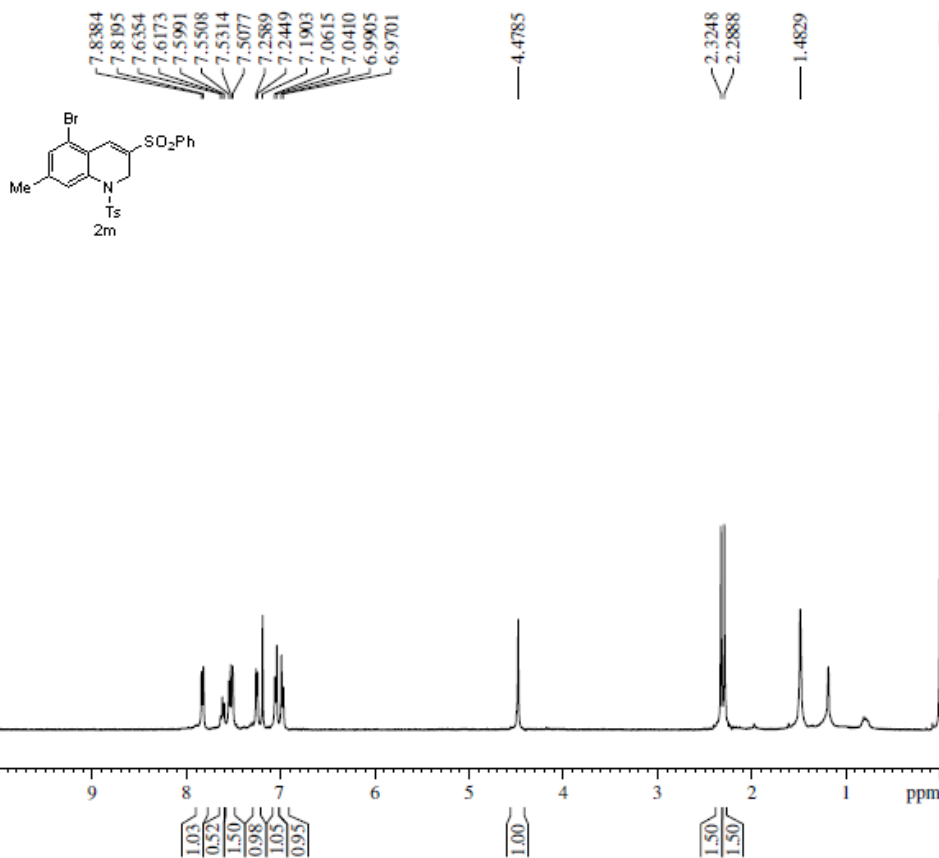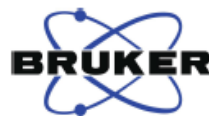

Current Data Parameters  
 NAME 20-Nov-FN-2017  
 EXPNO 380  
 PROCNO 1

F2 - Acquisition Parameters  
 Date\_ 20171120  
 Time 17.22  
 INSTRUM spect  
 PROBHD 5 mm PABBO BB/  
 PULPROG zg30  
 TD 65536  
 SOLVENT CDCl3  
 NS 8  
 DS 0  
 SWH 9615.385 Hz  
 FIDRES 0.146719 Hz  
 AQ 3.4078720 sec  
 RG 159.22  
 DW 52.000 usec  
 DE 6.50 usec  
 TE 300.0 K  
 D1 1.00000000 sec  
 TDO 1

==== CHANNEL f1 ====  
 SFO1 400.1629712 MHz  
 NUC1 1H  
 P1 13.20 usec  
 PLW1 13.00000000 W  
 F2 - Processing parameters  
 SI 65536  
 SF 400.1605372 MHz  
 WDW EM  
 SSB 0  
 LB 0.30 Hz  
 GB 0  
 PC 1.00

Figure 21: <sup>1</sup>H NMR spectrum of 2m

NRAT-VI-29

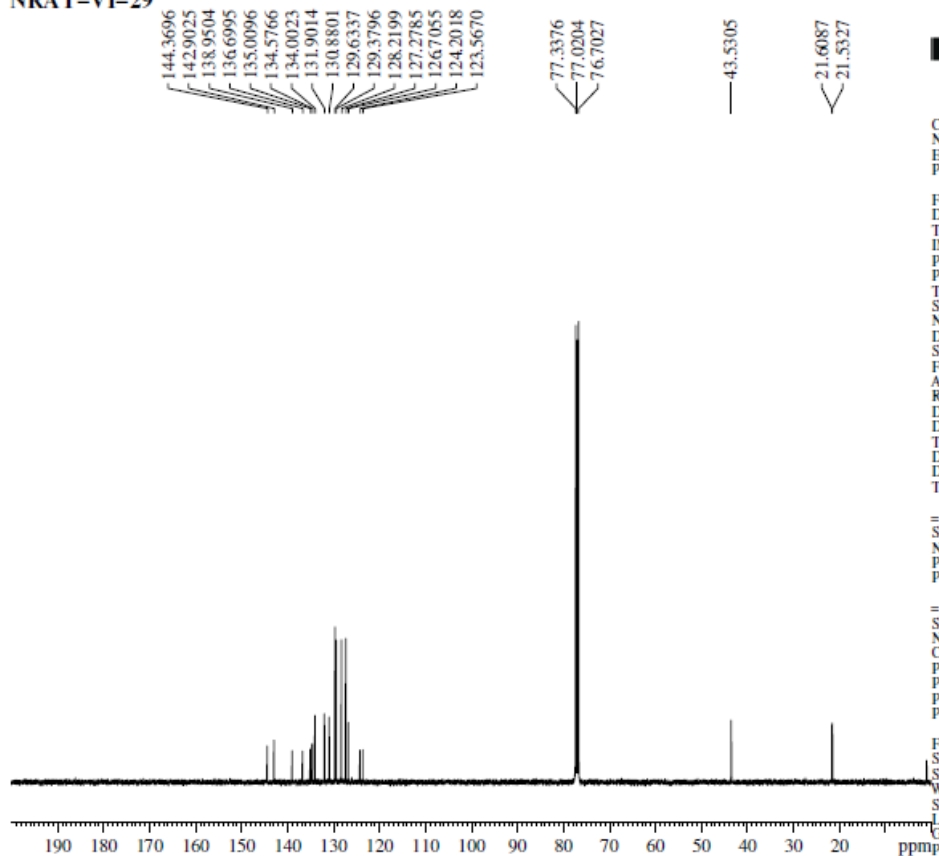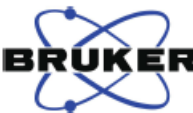

Current Data Parameters  
 NAME 13-Mar-AN-2018  
 EXPNO 360  
 PROCNO 1

F2 - Acquisition Parameters  
 Date\_ 20180314  
 Time 2.11  
 INSTRUM spect  
 PROBHD 5 mm PABBO BB/  
 PULPROG zgpg30  
 TD 65536  
 SOLVENT CDCl3  
 NS 1024  
 DS 4  
 SWH 24038.461 Hz  
 FIDRES 0.366798 Hz  
 AQ 1.3631488 sec  
 RG 201.48  
 DW 20.800 usec  
 DE 6.50 usec  
 TE 300.0 K  
 D1 2.00000000 sec  
 D11 0.03000000 sec  
 TDO 1

==== CHANNEL f1 ====  
 SFO1 100.6304993 MHz  
 NUC1 13C  
 P1 9.90 usec  
 PLW1 53.00000000 W  
 ==== CHANNEL f2 ====  
 SFO2 400.1621006 MHz  
 NUC2 1H  
 CPDPRG2 waltz16  
 PCPD2 90.00 usec  
 PLW2 13.00000000 W  
 PLW12 0.27963999 W  
 PLW13 0.22651000 W

F2 - Processing parameters  
 SI 32768  
 SF 100.6204380 MHz  
 WDW EM  
 SSB 0  
 LB 1.00 Hz  
 GB 0  
 PC 1.40

Figure 22: <sup>13</sup>C NMR spectrum of 2m

NRAT-VI-1

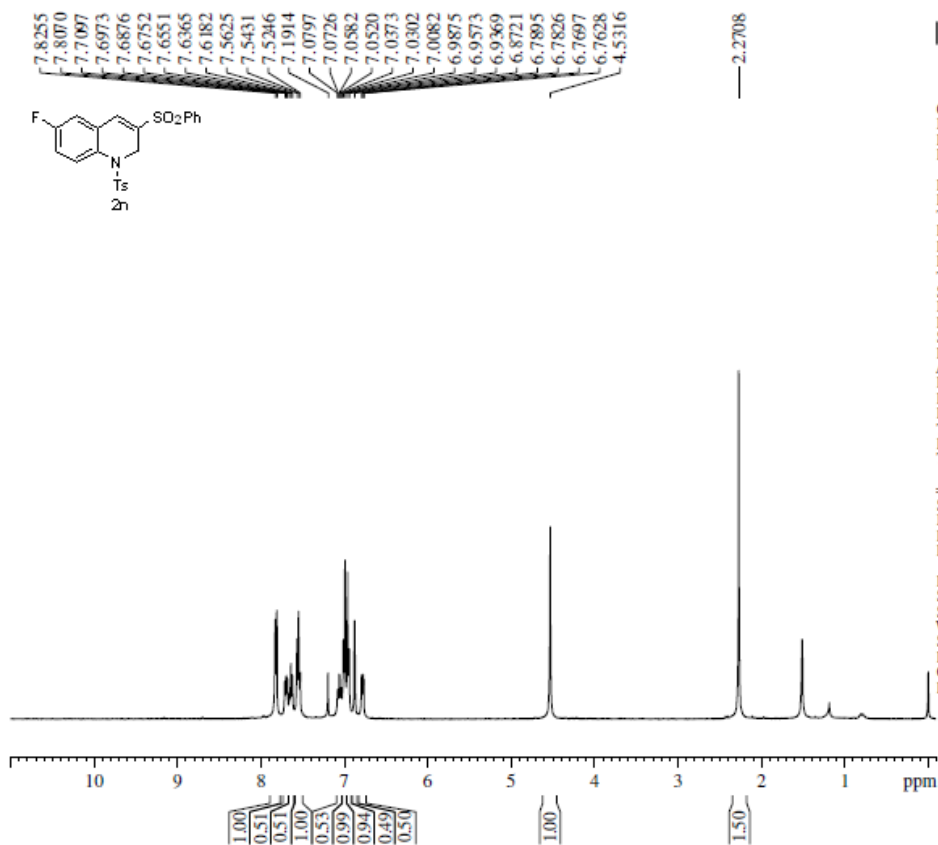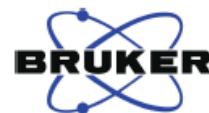

Current Data Parameters  
 NAME 09-OCT-FN-2017  
 EXPNO 420  
 PROCNO 1

F2 - Acquisition Parameters  
 Date\_ 20171009  
 Time 19.25  
 INSTRUM spect  
 PROBHD 5 mm PABBO BB/  
 PULPROG zg30  
 TD 65536  
 SOLVENT CDCl3  
 NS 8  
 DS 2  
 SWH 8012.820 Hz  
 FIDRES 0.122266 Hz  
 AQ 4.0894465 sec  
 RG 129.57  
 DW 62.400 usec  
 DE 6.50 usec  
 TE 300.0 K  
 D1 1.00000000 sec  
 TD0 1

==== CHANNEL f1 ====  
 SFO1 400.1629712 MHz  
 NUC1 1H  
 P1 13.20 usec  
 PLW1 13.00000000 W

F2 - Processing parameters  
 SI 65536  
 SF 400.1605368 MHz  
 WDW EM  
 SSB 0  
 LB 0.30 Hz  
 GB 0  
 PC 1.00

Figure 23: <sup>1</sup>H NMR spectrum of 2n

NRAT-VI-1

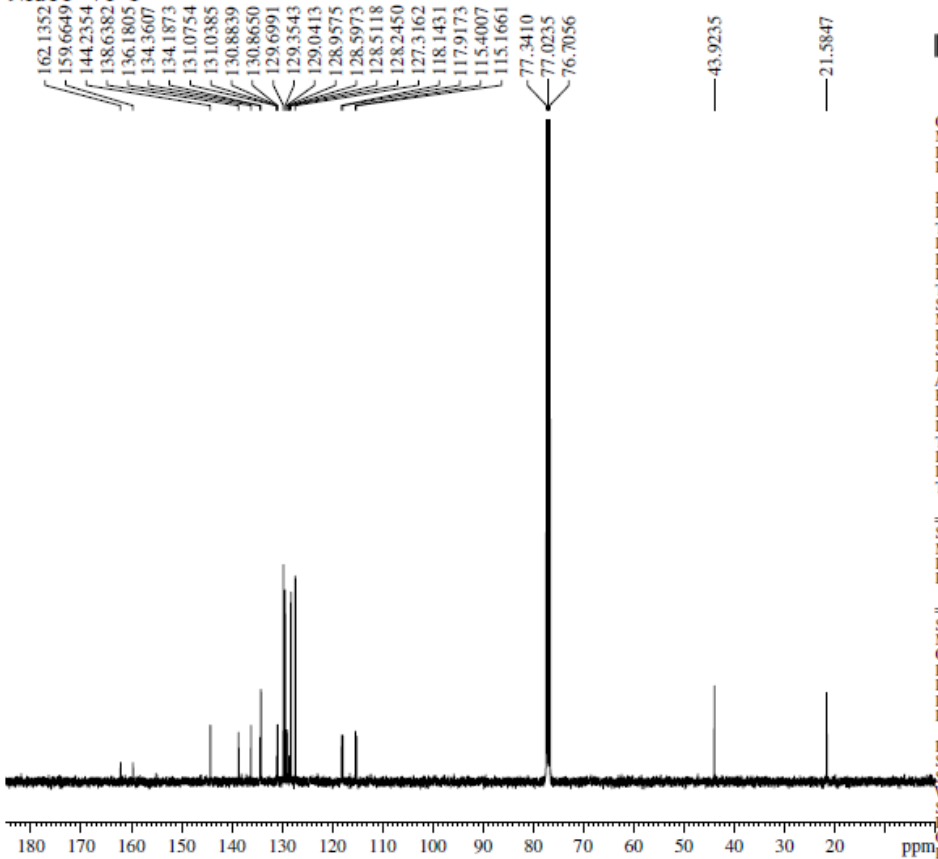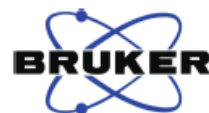

Current Data Parameters  
 NAME 10-Oct-AN-2017  
 EXPNO 350  
 PROCNO 1

F2 - Acquisition Parameters  
 Date\_ 20171011  
 Time 1.37  
 INSTRUM spect  
 PROBHD 5 mm PABBO BB/  
 PULPROG zgpg30  
 TD 65536  
 SOLVENT CDCl3  
 NS 512  
 DS 0  
 SWH 24038.461 Hz  
 FIDRES 0.366798 Hz  
 AQ 1.3631488 sec  
 RG 201.48  
 DW 20.800 usec  
 DE 6.50 usec  
 TE 300.0 K  
 D1 2.00000000 sec  
 D11 0.03000000 sec  
 TD0 1

==== CHANNEL f1 ====  
 SFO1 100.6304993 MHz  
 NUC1 13C  
 P1 9.90 usec  
 PLW1 53.00000000 W

==== CHANNEL f2 ====  
 SFO2 400.1621006 MHz  
 NUC2 1H  
 CPDPRG[2] waltz16  
 PCPD2 90.00 usec  
 PLW2 13.00000000 W  
 PLW12 0.27963999 W  
 PLW13 0.22651000 W

F2 - Processing parameters  
 SI 32768  
 SF 100.6204380 MHz  
 WDW EM  
 SSB 0  
 LB 1.00 Hz  
 GB 0  
 PC 1.40

Figure 24: <sup>13</sup>C NMR spectrum of 2n

NRAT-VI-88

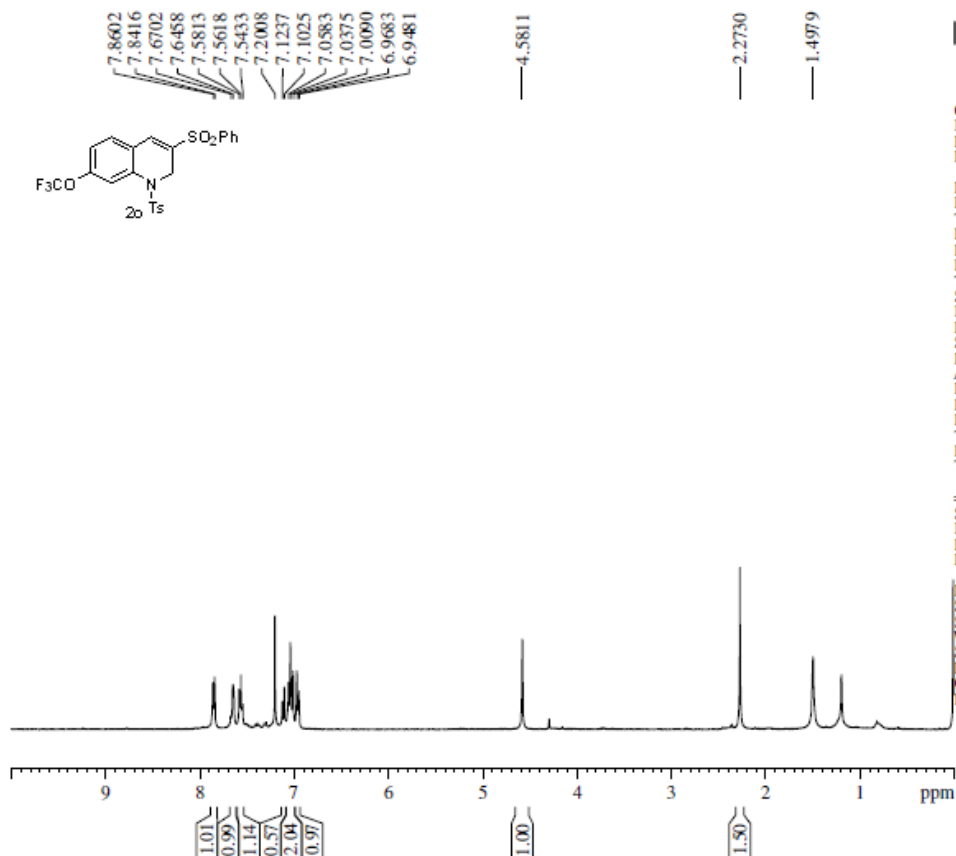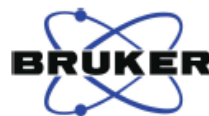

Current Data Parameters  
 NAME 19-Feb-FN-2018  
 EXPNO 330  
 PROCNO 1

F2 - Acquisition Parameters  
 Date\_ 20180219  
 Time 16.47  
 INSTRUM spect  
 PROBHD 5 mm PABBO BB/  
 PULPROG zg30  
 TD 65536  
 SOLVENT CDCl3  
 NS 8  
 DS 2  
 SWH 8012.820 Hz  
 FIDRES 0.122266 Hz  
 AQ 4.0894465 sec  
 RG 159.22  
 DW 62.400 usec  
 DE 6.50 usec  
 TE 300.0 K  
 D1 1.00000000 sec  
 TDO 1

==== CHANNEL f1 ====  
 SFO1 400.1629712 MHz  
 NUC1 1H  
 P1 13.20 usec  
 PLW1 13.00000000 W

F2 - Processing parameters  
 SI 65536  
 SF 400.1605330 MHz  
 WDW EM  
 SSB 0  
 LB 0.30 Hz  
 GB 0  
 PC 1.00

Figure 25: <sup>1</sup>H NMR spectrum of 2o

NRAT-VI-88

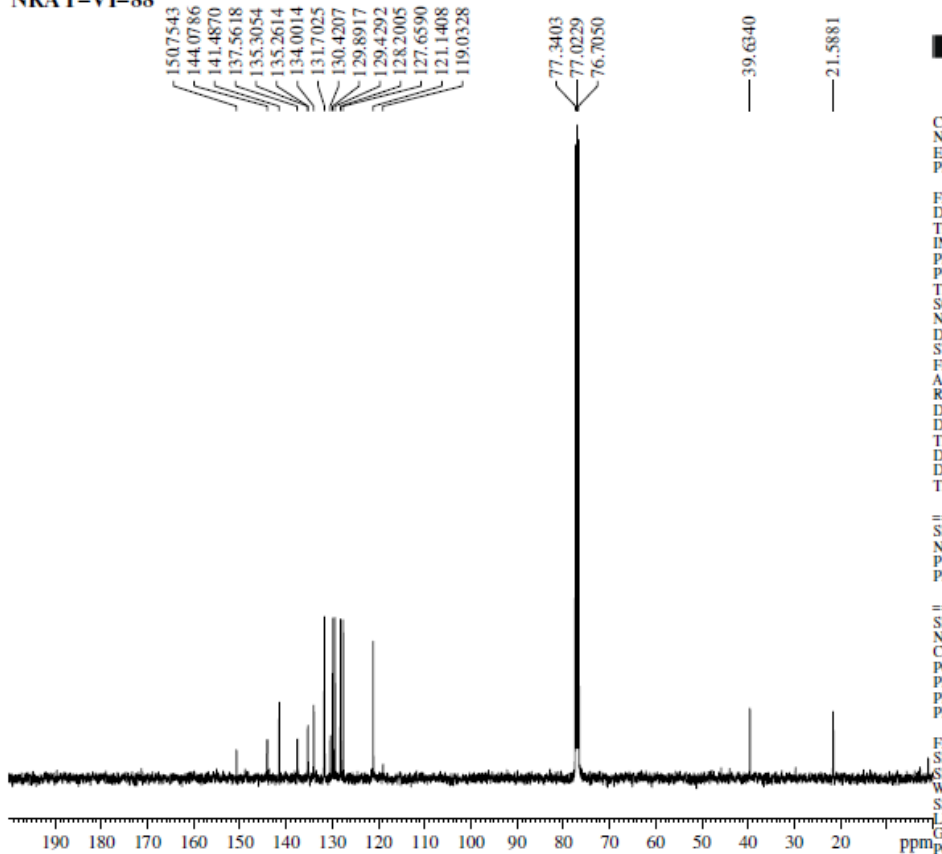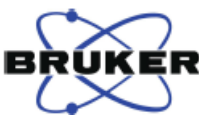

Current Data Parameters  
 NAME 23-Feb-AN-2018  
 EXPNO 470  
 PROCNO 1

F2 - Acquisition Parameters  
 Date\_ 20180226  
 Time 13.38  
 INSTRUM spect  
 PROBHD 5 mm PABBO BB/  
 PULPROG zgpg30  
 TD 65536  
 SOLVENT CDCl3  
 NS 512  
 DS 0  
 SWH 24038.461 Hz  
 FIDRES 0.366798 Hz  
 AQ 1.3631488 sec  
 RG 201.48  
 DW 20.800 usec  
 DE 6.50 usec  
 TE 300.0 K  
 D1 2.00000000 sec  
 D11 0.03000000 sec  
 TDO 1

==== CHANNEL f1 ====  
 SFO1 100.6304993 MHz  
 NUC1 13C  
 P1 9.90 usec  
 PLW1 53.00000000 W

==== CHANNEL f2 ====  
 SFO2 400.1621006 MHz  
 NUC2 1H  
 CPDPRG2 waltz16  
 PCPD2 90.00 usec  
 PLW2 13.00000000 W  
 PLW12 0.27963999 W  
 PLW13 0.22651000 W

F2 - Processing parameters  
 SI 32768  
 SF 100.6204380 MHz  
 WDW EM  
 SSB 0  
 LB 3.00 Hz  
 GB 0  
 PC 1.40

Figure 26: <sup>13</sup>C NMR spectrum of 2o



NRAT-VI-64

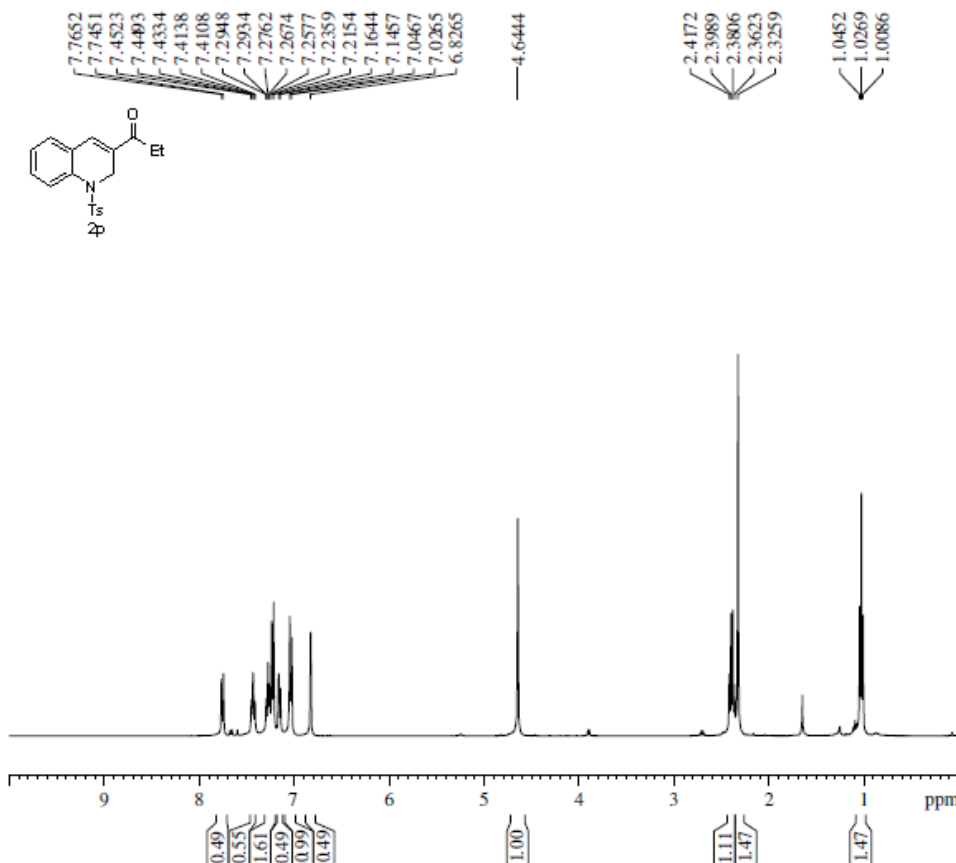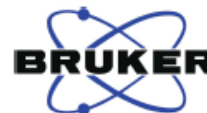

Current Data Parameters  
 NAME 08-JAN-FN-2018  
 EXPNO 320  
 PROCNO 1

F2 - Acquisition Parameters  
 Date\_ 20180108  
 Time 16.02  
 INSTRUM spect  
 PROBHD 5 mm PABBO BB/  
 PULPROG zg30  
 TD 65536  
 SOLVENT CDCl3  
 NS 8  
 DS 0  
 SWH 8012.820 Hz  
 FIDRES 0.122266 Hz  
 AQ 4.0894465 sec  
 RG 80.54  
 DW 62.400 usec  
 DE 6.50 usec  
 TE 300.0 K  
 D1 1.00000000 sec  
 TDO 1

==== CHANNEL f1 ====  
 SFO1 400.1629712 MHz  
 NUC1 1H  
 P1 13.20 usec  
 PLW1 13.00000000 W

F2 - Processing parameters  
 SI 65536  
 SF 400.1605062 MHz  
 WDW EM  
 SSB 0  
 LB 0.30 Hz  
 GB 0  
 PC 1.00

Figure 27: <sup>1</sup>H NMR spectrum of 2p

NRAT-VI-64

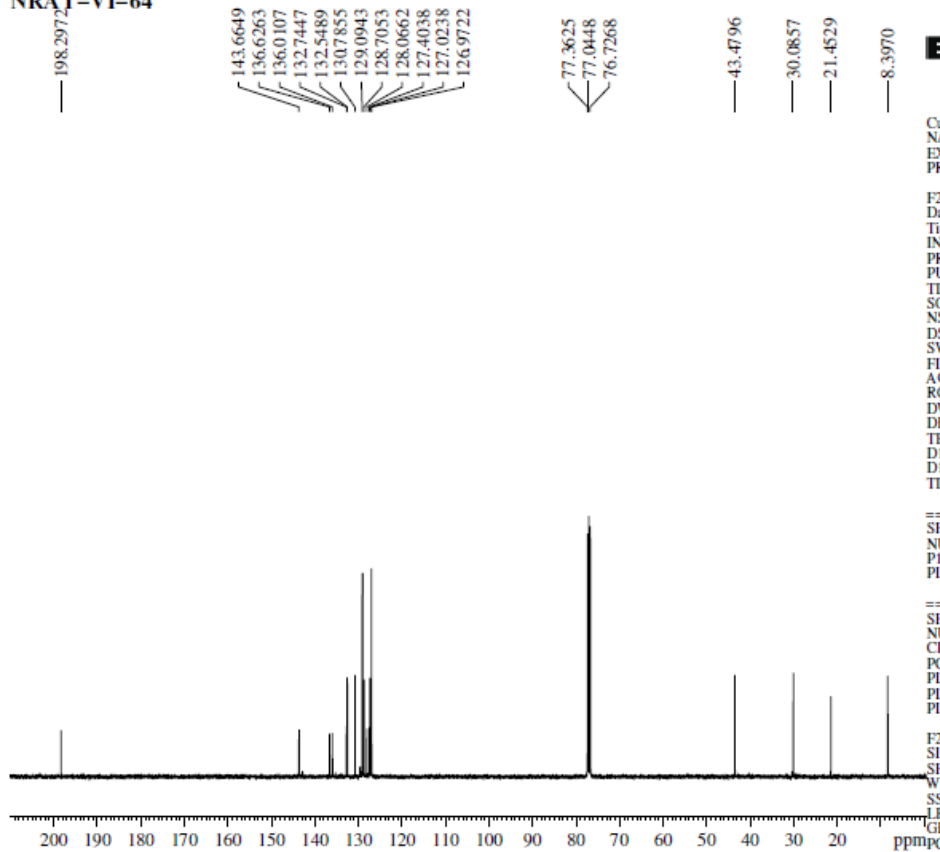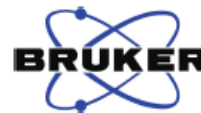

Current Data Parameters  
 NAME 10-Jan-FN-2018  
 EXPNO 380  
 PROCNO 1

F2 - Acquisition Parameters  
 Date\_ 20180110  
 Time 18.01  
 INSTRUM spect  
 PROBHD 5 mm PABBO BB/  
 PULPROG zgpg30  
 TD 65536  
 SOLVENT CDCl3  
 NS 512  
 DS 0  
 SWH 24038.461 Hz  
 FIDRES 0.366798 Hz  
 AQ 1.3631488 sec  
 RG 201.48  
 DW 20.800 usec  
 DE 6.50 usec  
 TE 300.0 K  
 D1 2.00000000 sec  
 D11 0.03000000 sec  
 TDO 1

==== CHANNEL f1 ====  
 SFO1 100.6304993 MHz  
 NUC1 13C  
 P1 9.90 usec  
 PLW1 53.00000000 W

==== CHANNEL f2 ====  
 SFO2 400.1621006 MHz  
 NUC2 1H  
 CDPDRG2 waltz16  
 PCPD2 90.00 usec  
 PLW2 13.00000000 W  
 PLW12 0.27963999 W  
 PLW13 0.22651000 W

F2 - Processing parameters  
 SI 32768  
 SF 100.6204380 MHz  
 WDW EM  
 SSB 0  
 LB 1.00 Hz  
 GB 0  
 PC 1.40

Figure 28: <sup>13</sup>C NMR spectrum of 2p

NRAT-VI-60

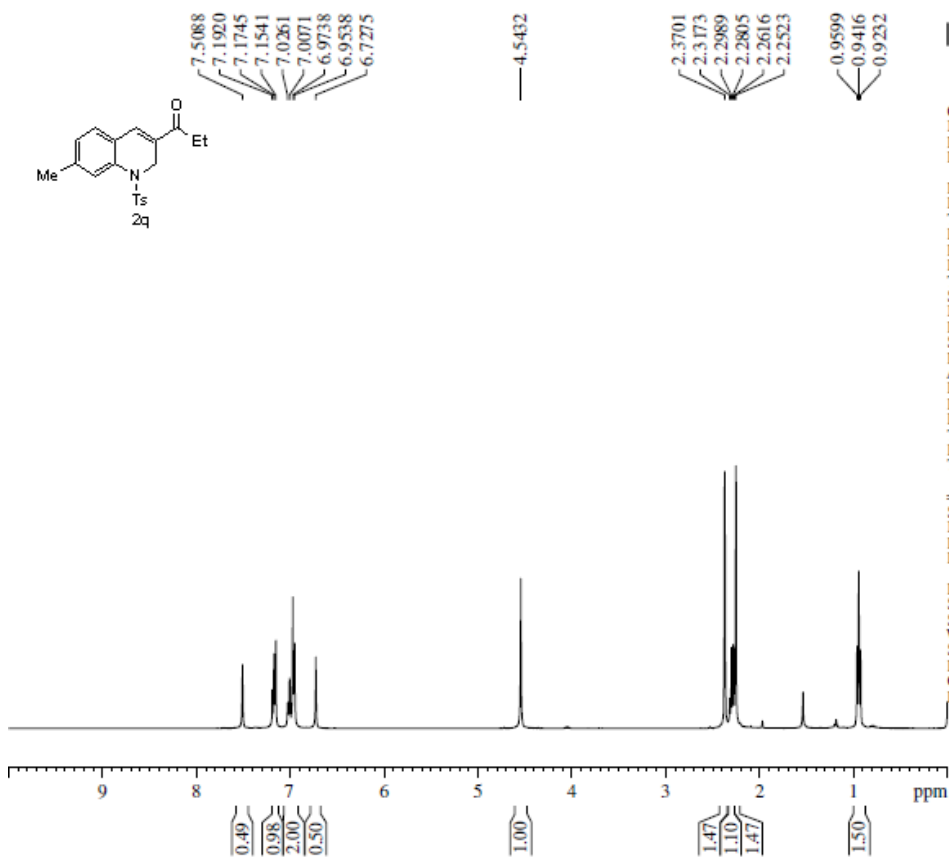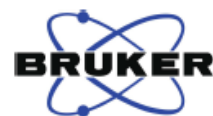

Current Data Parameters  
 NAME 26-Dec-FN-2017  
 EXPNO 430  
 PROCNO 1

F2 - Acquisition Parameters  
 Date\_ 20171226  
 Time 17.08  
 INSTRUM spect  
 PROBHD 5 mm PABBO BB/  
 PULPROG zg30  
 TD 65536  
 SOLVENT CDC13  
 NS 8  
 DS 0  
 SWH 9615.385 Hz  
 FIDRES 0.146719 Hz  
 AQ 3.4078720 sec  
 RG 100.41  
 DW 52.000 usec  
 DE 6.50 usec  
 TE 300.0 K  
 D1 1.00000000 sec  
 TD0 1

==== CHANNEL f1 ====  
 SFO1 400.1629712 MHz  
 NUC1 1H  
 P1 13.20 usec  
 PLW1 13.00000000 W

F2 - Processing parameters  
 SI 65536  
 SF 400.1605361 MHz  
 WDW EM  
 SSB 0  
 LB 0.30 Hz  
 GB 0  
 PC 1.00

Figure 29: <sup>1</sup>H NMR spectrum of 2q

NRAT-VI-60

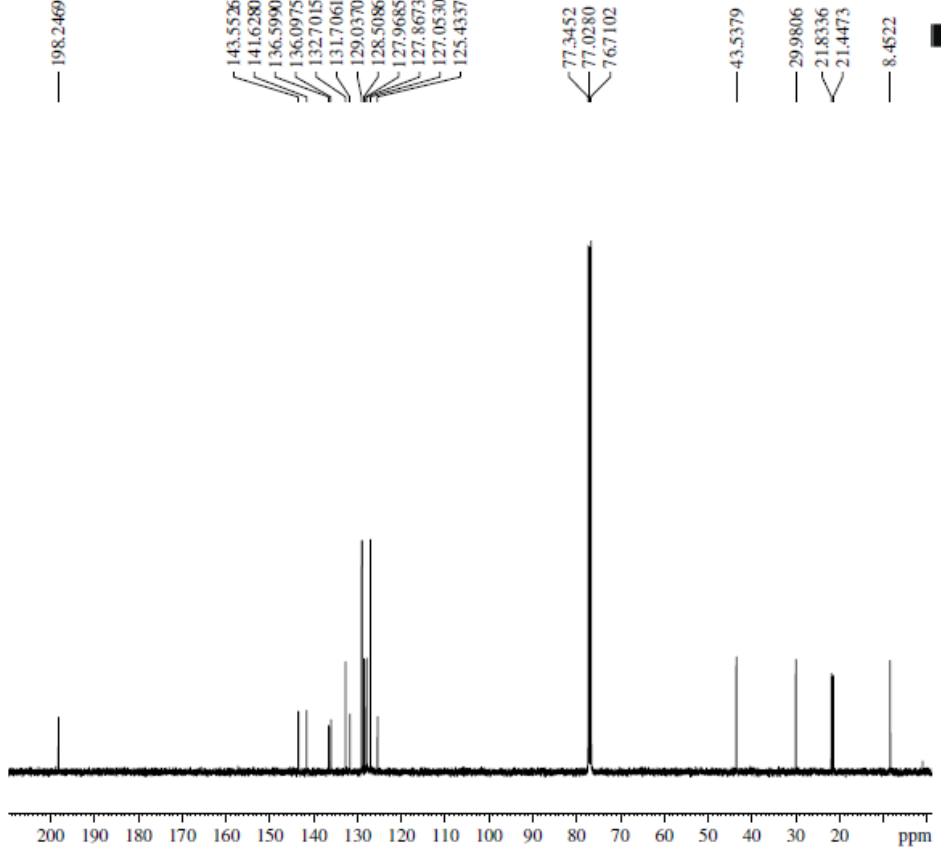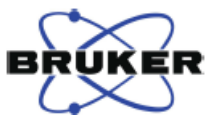

Current Data Parameters  
 NAME 27-Dec-FN-2017  
 EXPNO 350  
 PROCNO 1

F2 - Acquisition Parameters  
 Date\_ 20171228  
 Time 10.23  
 INSTRUM spect  
 PROBHD 5 mm PABBO BB  
 PULPROG zgpg30  
 TD 65536  
 SOLVENT CDC13  
 NS 512  
 DS 0  
 SWH 24038.461 Hz  
 FIDRES 0.366798 Hz  
 AQ 1.3631488 sec  
 RG 201.48  
 DW 20.800 usec  
 DE 6.50 usec  
 TE 300.0 K  
 D1 2.00000000 sec  
 D11 0.03000000 sec  
 TD0 1

==== CHANNEL f1 ====  
 SFO1 100.6304993 MHz  
 NUC1 13C  
 P1 9.90 usec  
 PLW1 53.00000000 W

==== CHANNEL f2 ====  
 SFO2 400.1621006 MHz  
 NUC2 1H  
 CPDPRG[2] waltz16  
 PCPD2 90.00 usec  
 PLW2 13.00000000 W  
 PLW12 0.27963999 W  
 PLW13 0.22651000 W

F2 - Processing parameters  
 SI 32768  
 SF 100.6204380 MHz  
 WDW EM  
 SSB 0  
 LB 1.00 Hz  
 GB 0  
 PC 1.40

Figure 30: <sup>13</sup>C NMR spectrum of 2q

NRAT-VI-65

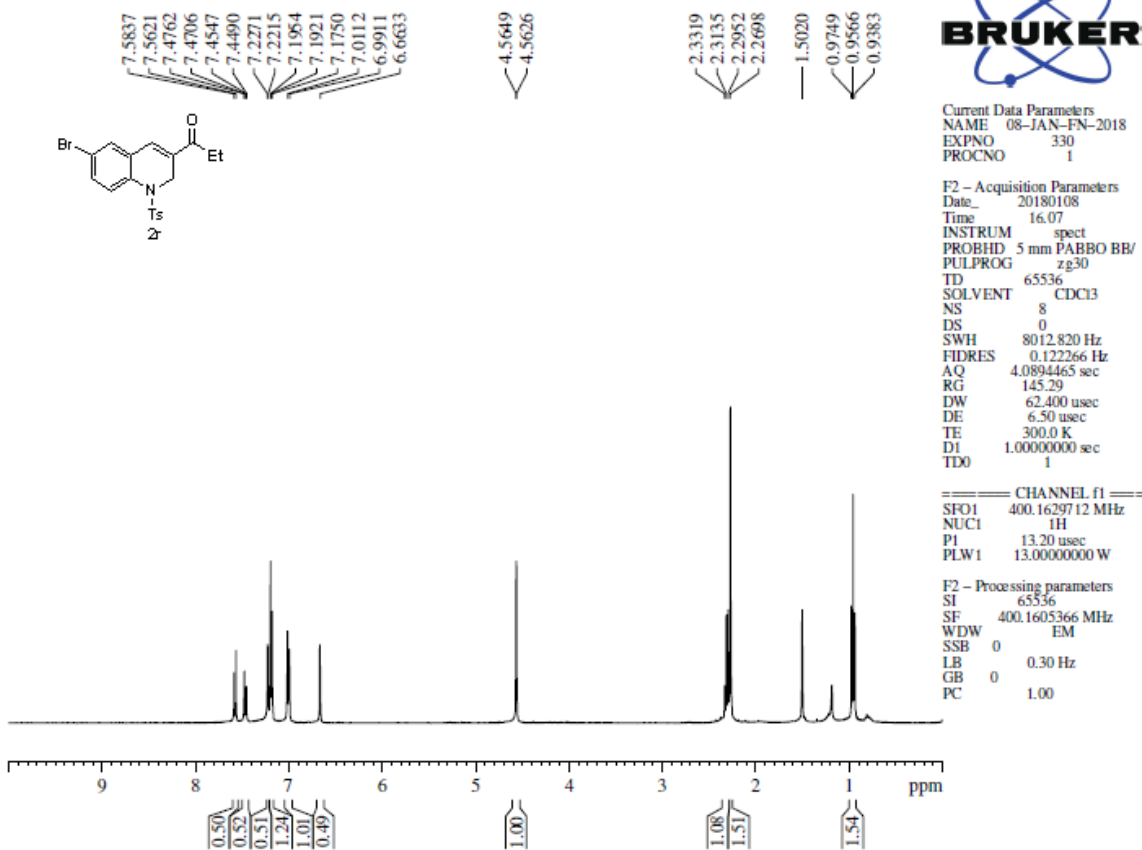

Figure 31: <sup>1</sup>H NMR spectrum of 2r

NRAT-VI-65

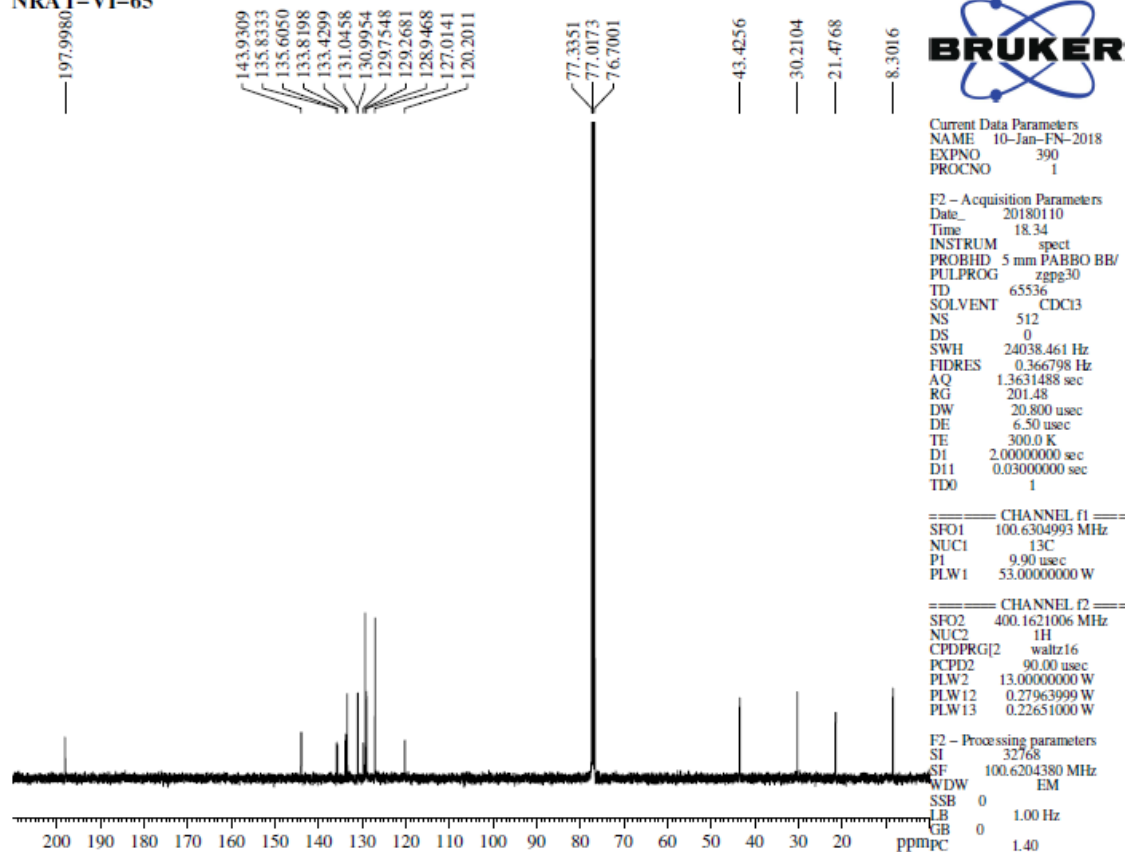

Figure 32: <sup>13</sup>C NMR spectrum of 2r

NRAT VI 107

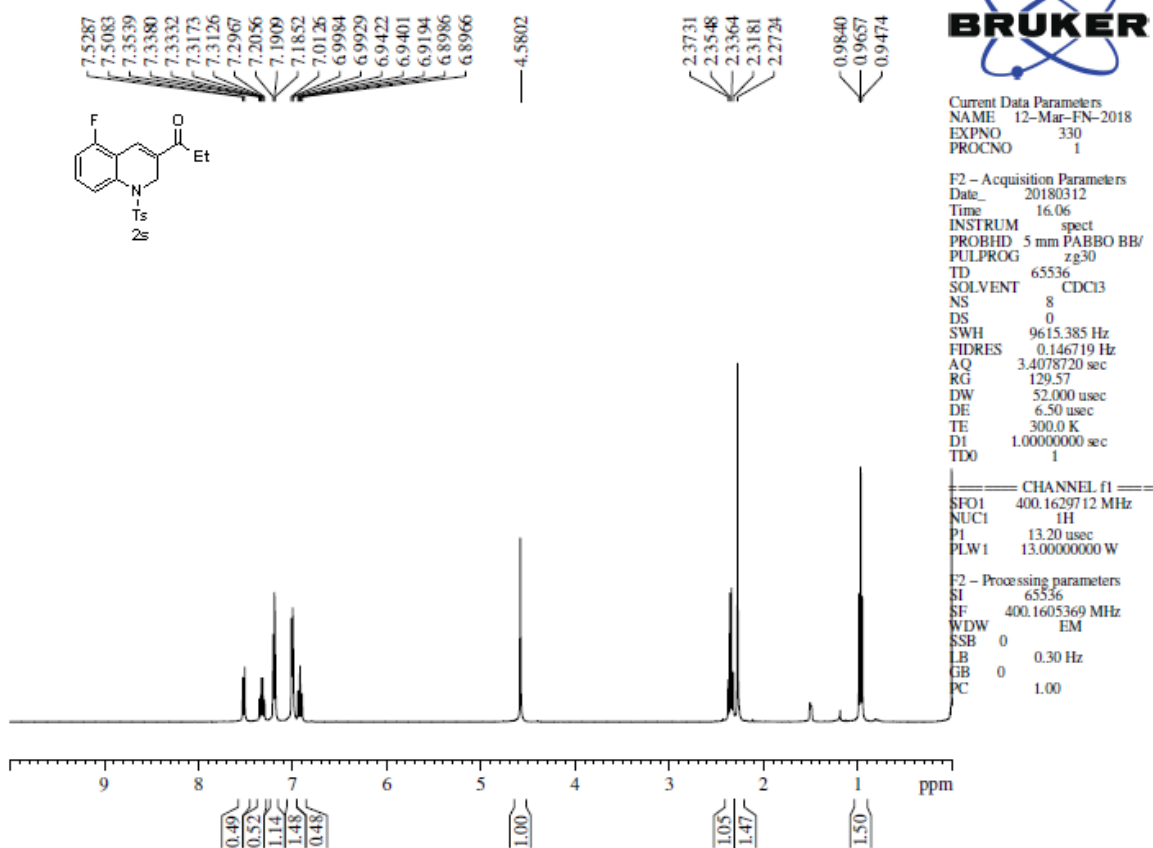

Figure 33: <sup>1</sup>H NMR spectrum of 2s

NRAT-VI-107

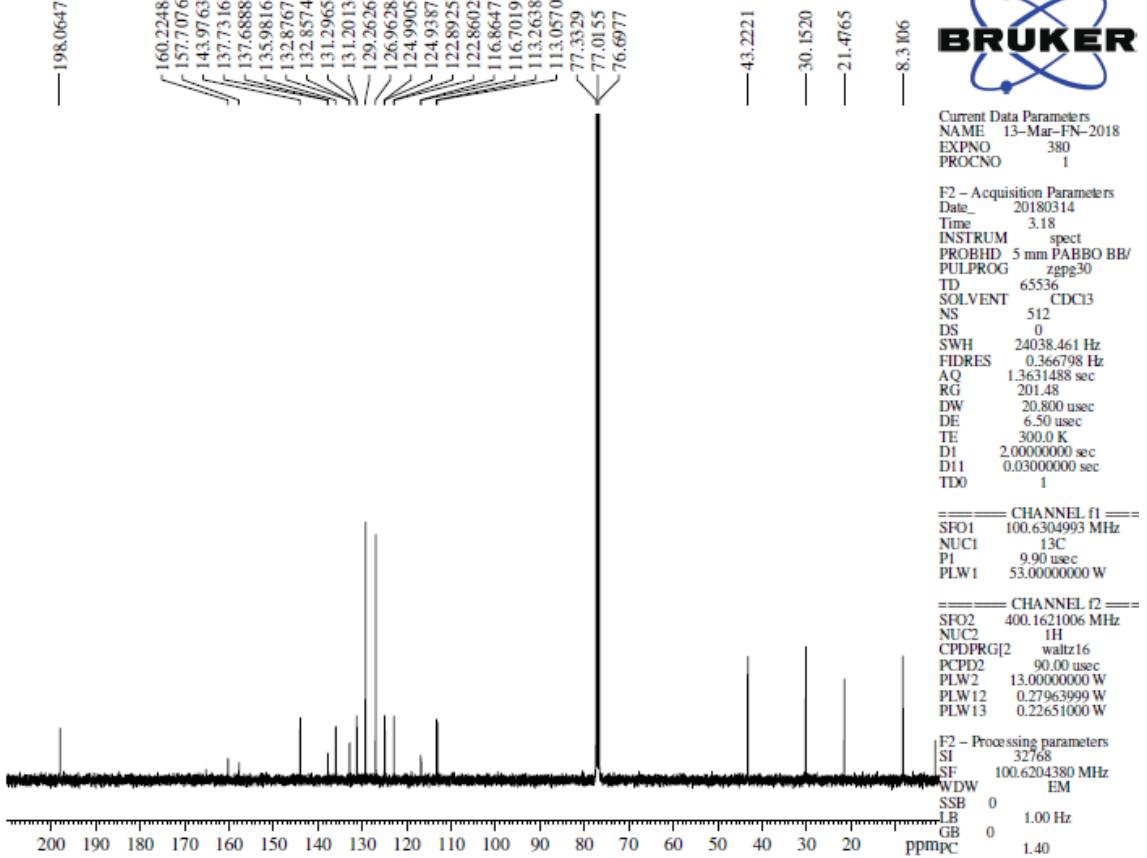

Figure 34: <sup>13</sup>C NMR spectrum of 2s

NRAT-VI-99

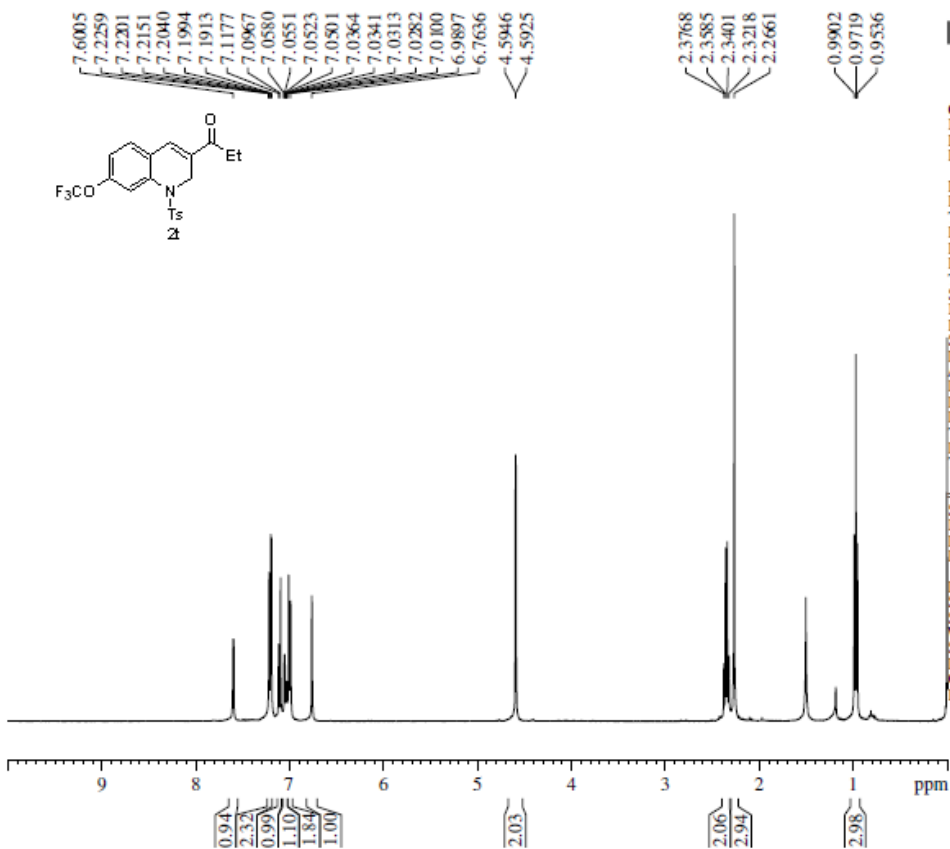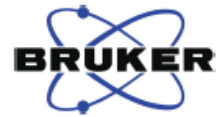

Current Data Parameters  
 NAME 27-Feb-FN-2018  
 EXPNO 390  
 PROCNO 1

F2 - Acquisition Parameters  
 Date\_ 20180227  
 Time 16.56  
 INSTRUM spect  
 PROBHD 5 mm PABBO BB/  
 PULPROG zg30  
 TD 65536  
 SOLVENT CDCl3  
 NS 8  
 DS 0  
 SWH 9615.385 Hz  
 FIDRES 0.146719 Hz  
 AQ 3.4078720 sec  
 RG 129.57  
 DW 52.000 usec  
 DE 6.50 usec  
 TE 300.0 K  
 D1 1.00000000 sec  
 TD0 1

==== CHANNEL f1 ====  
 SFO1 400.1629712 MHz  
 NUC1 1H  
 P1 13.20 usec  
 PLW1 13.00000000 W

F2 - Processing parameters  
 SI 65536  
 SF 400.1605369 MHz  
 WDW EM  
 SSB 0  
 LB 0.30 Hz  
 GB 0  
 PC 1.00

Figure 35: <sup>1</sup>H NMR spectrum of 2t

NRAT-VI-99

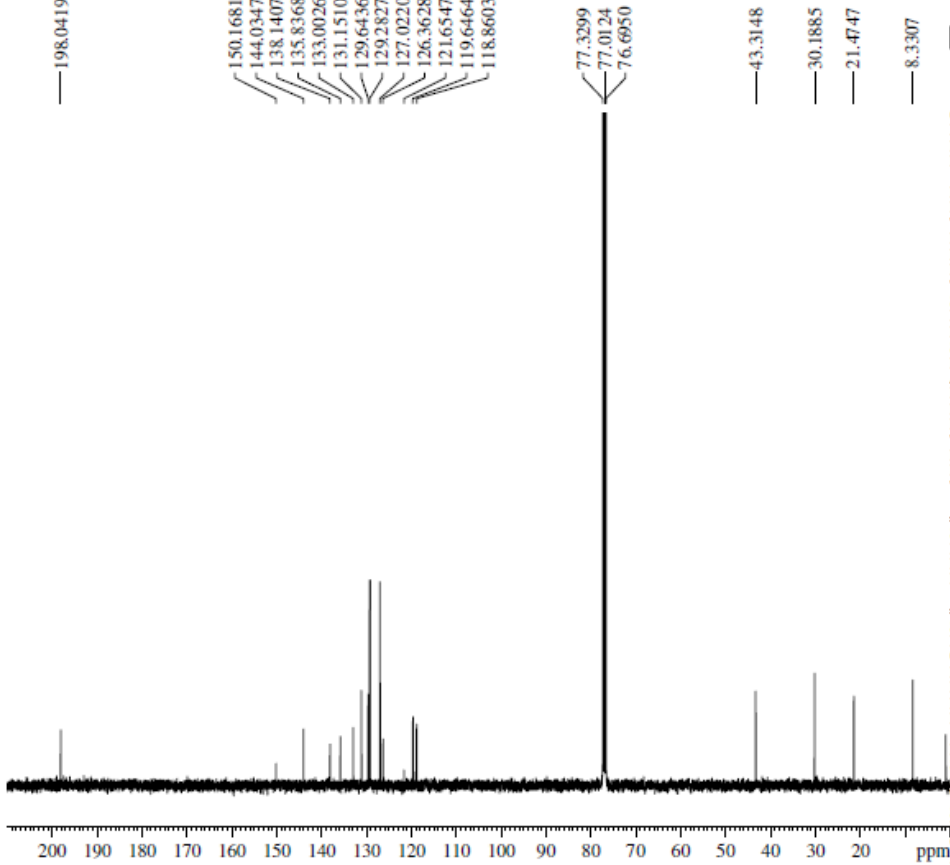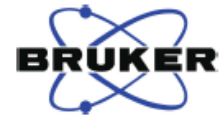

Current Data Parameters  
 NAME 28-Feb-AN-2018  
 EXPNO 340  
 PROCNO 1

F2 - Acquisition Parameters  
 Date\_ 20180301  
 Time 4.05  
 INSTRUM spect  
 PROBHD 5 mm PABBO BB/  
 PULPROG zgpg30  
 TD 65536  
 SOLVENT CDCl3  
 NS 512  
 DS 0  
 SWH 24038.461 Hz  
 FIDRES 0.366798 Hz  
 AQ 1.3631488 sec  
 RG 201.48  
 DW 20.800 usec  
 DE 6.50 usec  
 TE 300.0 K  
 D1 2.00000000 sec  
 D11 0.03000000 sec  
 TD0 1

==== CHANNEL f1 ====  
 SFO1 100.6304993 MHz  
 NUC1 13C  
 P1 9.90 usec  
 PLW1 53.00000000 W

==== CHANNEL f2 ====  
 SFO2 400.1621006 MHz  
 NUC2 1H  
 CPDPRG2 waltz16  
 PCPD2 90.00 usec  
 PLW2 13.00000000 W  
 PLW12 0.27963999 W  
 PLW13 0.22651000 W

F2 - Processing parameters  
 SI 32768  
 SF 100.6204380 MHz  
 WDW EM  
 SSB 0  
 LB 1.00 Hz  
 GB 0  
 PC 1.40

Figure 36: <sup>13</sup>C NMR spectrum of 2t

NRAT-VI-119

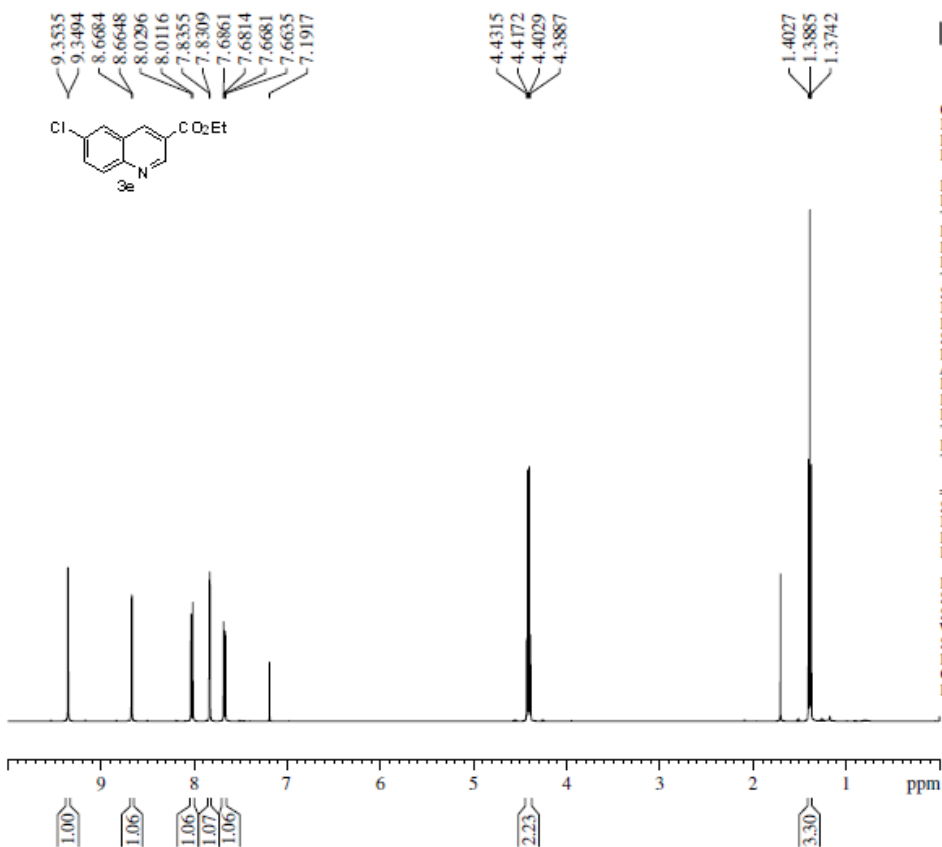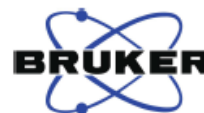

Current Data Parameters  
 NAME 27-Apr-FN-2018  
 EXPNO 370  
 PROCNO 1

F2 - Acquisition Parameters  
 Date\_ 20180427  
 Time 8.09  
 INSTRUM spect  
 PROBHD 5 mm PATXI 1H  
 PULPROG zg30  
 TD 65536  
 SOLVENT CDC13  
 NS 8  
 DS 2  
 SWH 12019.230 Hz  
 FIDRES 0.183399 Hz  
 AQ 2.7262976 sec  
 RG 136.78  
 DW 41.600 usec  
 DE 6.50 usec  
 TE 0 K  
 D1 1.0000000 sec  
 TD0 1

==== CHANNEL f1 ====  
 SFO1 500.6794419 MHz  
 NUC1 1H  
 P1 6.45 usec  
 PLW1 13.6000038 W

F2 - Processing parameters  
 SI 65536  
 SF 500.6763957 MHz  
 WDW EM  
 SSB 0  
 LB 0.30 Hz  
 GB 0  
 PC 1.00

Figure 37: <sup>1</sup>H NMR spectrum of 3e

NRAT-VI-119

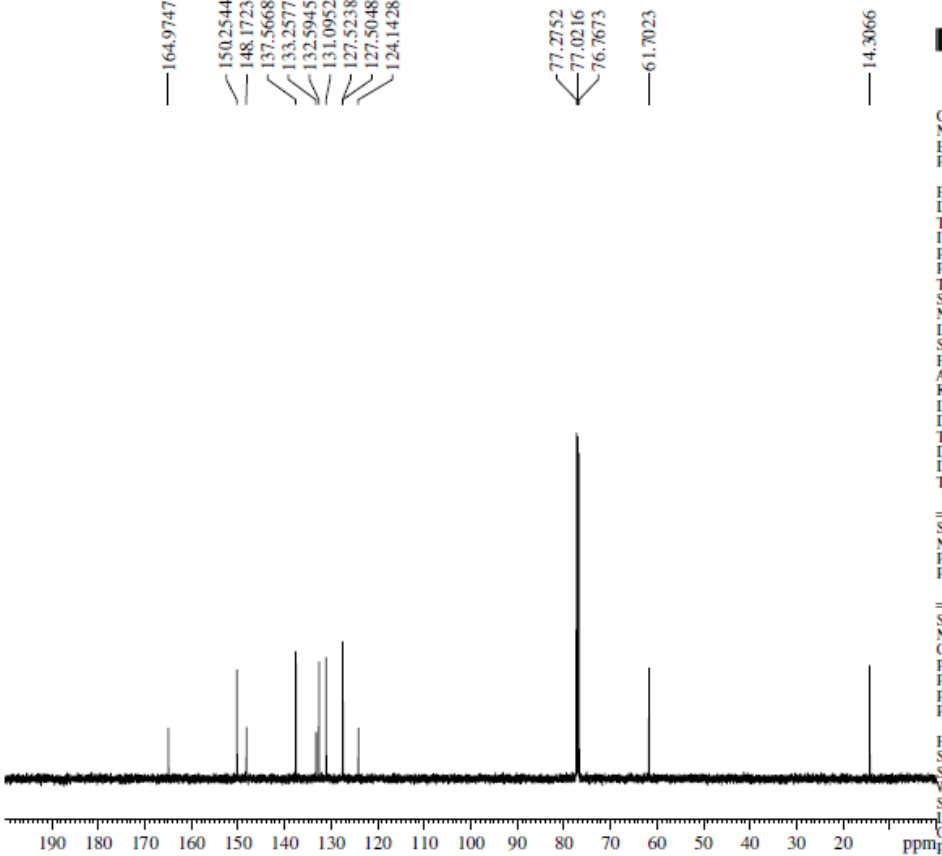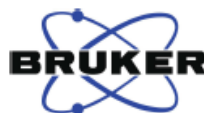

Current Data Parameters  
 NAME 01-May-AN-2018  
 EXPNO 430  
 PROCNO 1

F2 - Acquisition Parameters  
 Date\_ 20180502  
 Time 6.55  
 INSTRUM spect  
 PROBHD 5 mm PATXI 1H  
 PULPROG zgpg30  
 TD 65536  
 SOLVENT CDC13  
 NS 512  
 DS 4  
 SWH 29761.904 Hz  
 FIDRES 0.454131 Hz  
 AQ 1.1010048 sec  
 RG 81.53  
 DW 16.800 usec  
 DE 6.50 usec  
 TE 303.0 K  
 D1 2.0000000 sec  
 D11 0.0300000 sec  
 TD0 1

==== CHANNEL f1 ====  
 SFO1 125.9077573 MHz  
 NUC1 13C  
 P1 9.23 usec  
 PLW1 244.0000000 W

==== CHANNEL f2 ====  
 SFO2 500.6783527 MHz  
 NUC2 1H  
 CPDPRG2 waltz16  
 PCPD2 80.00 usec  
 PLW2 13.6000038 W  
 PLW12 0.08840500 W  
 PLW13 0.05657900 W

F2 - Processing parameters  
 SI 32768  
 SF 125.8951680 MHz  
 WDW EM  
 SSB 0  
 LB 1.00 Hz  
 GB 0  
 PC 1.40

Figure 38: <sup>13</sup>C NMR spectrum of 3e

NRAT-VI-118

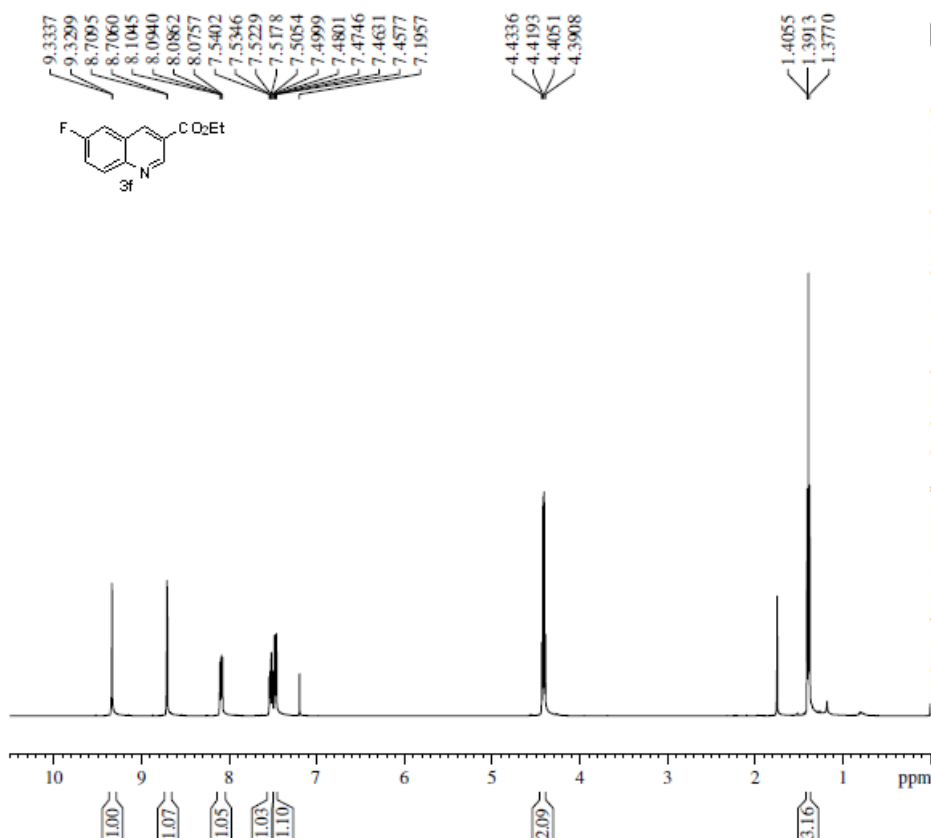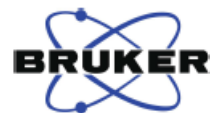

Current Data Parameters  
 NAME 27-Apr-FN-2018  
 EXPNO 360  
 PROCNO 1

F2 - Acquisition Parameters  
 Date\_ 20180427  
 Time 8.04  
 INSTRUM spect  
 PROBHD 5 mm PATXI 1H  
 PULPROG zg30  
 TD 65536  
 SOLVENT CDCl3  
 NS 8  
 DS 2  
 SWH 12019.230 Hz  
 FIDRES 0.183399 Hz  
 AQ 2.7262976 sec  
 RG 121.1  
 DW 41.600 usec  
 DE 6.50 usec  
 TE 0 K  
 D1 1.00000000 sec  
 TD0 1

==== CHANNEL f1 ====  
 SFO1 500.6794419 MHz  
 NUC1 1H  
 P1 6.45 usec  
 PLW1 13.60000038 W

F2 - Processing parameters  
 SI 65536  
 SF 500.6763936 MHz  
 WDW EM  
 SSB 0  
 LB 0.30 Hz  
 GB 0  
 PC 1.00

Figure 39: <sup>1</sup>H NMR spectrum of 3f

NRAT-VI-118

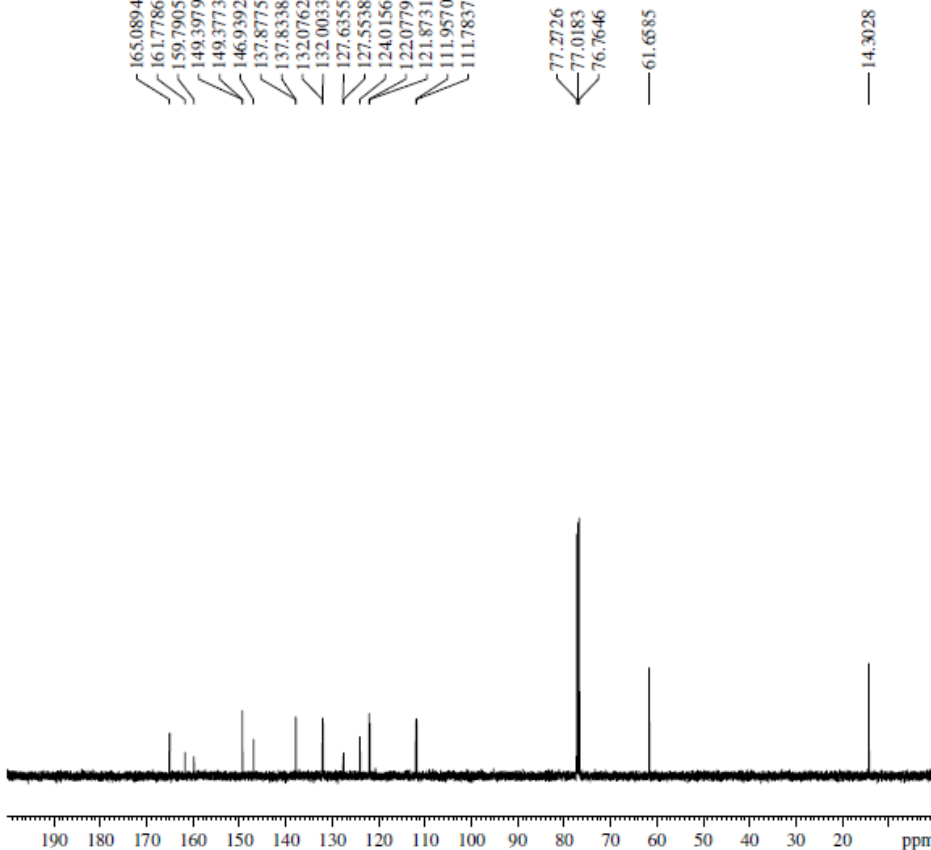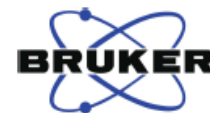

Current Data Parameters  
 NAME 01-May-AN-2018  
 EXPNO 420  
 PROCNO 1

F2 - Acquisition Parameters  
 Date\_ 20180502  
 Time 6.35  
 INSTRUM spect  
 PROBHD 5 mm PATXI 1H  
 PULPROG zgpg30  
 TD 65536  
 SOLVENT CDCl3  
 NS 512  
 DS 4  
 SWH 29761.904 Hz  
 FIDRES 0.454131 Hz  
 AQ 1.1010048 sec  
 RG 81.53  
 DW 16.800 usec  
 DE 6.50 usec  
 TE 303.0 K  
 D1 2.00000000 sec  
 D11 0.03000000 sec  
 TD0 1

==== CHANNEL f1 ====  
 SFO1 125.9077573 MHz  
 NUC1 13C  
 P1 9.23 usec  
 PLW1 244.00000000 W

==== CHANNEL f2 ====  
 SFO2 500.6783527 MHz  
 NUC2 1H  
 CPDPRG2 waltz16  
 PCPD2 80.00 usec  
 PLW2 13.60000038 W  
 PLW12 0.08840500 W  
 PLW13 0.05657900 W

F2 - Processing parameters  
 SI 32768  
 SF 125.8951680 MHz  
 WDW EM  
 SSB 0  
 LB 1.00 Hz  
 GB 0  
 PC 1.40

Figure 40: <sup>13</sup>C NMR spectrum of 3f

NRAT-V-192

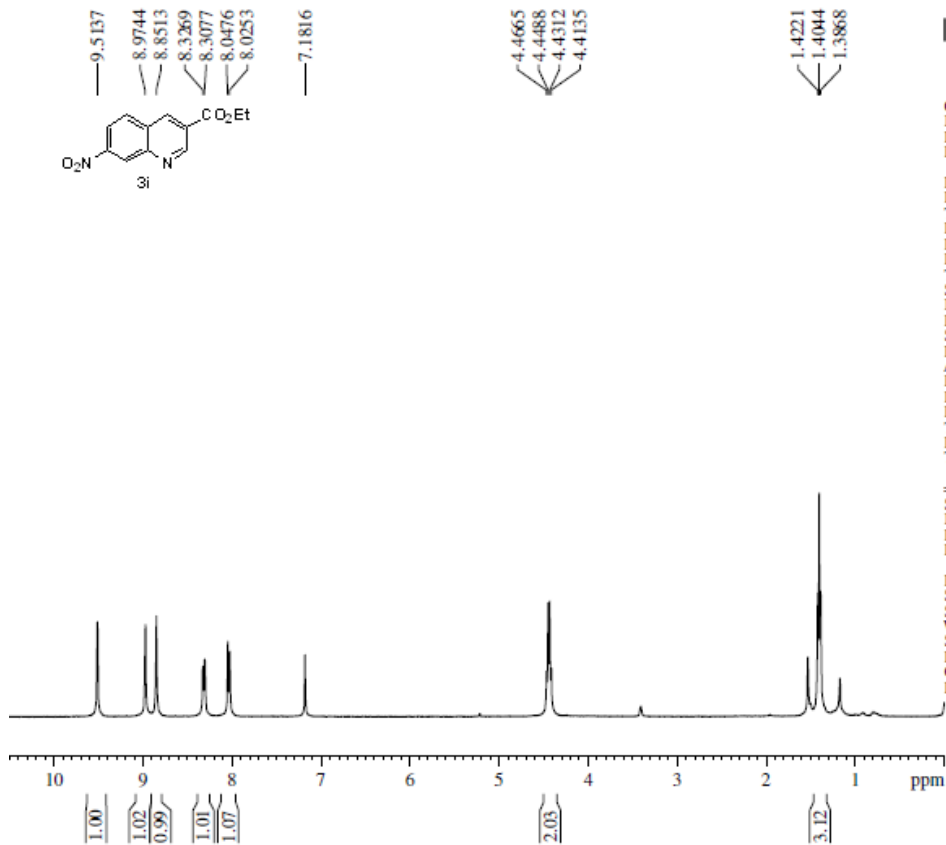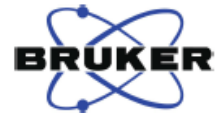

Current Data Parameters  
 NAME 20-July-FN-2017  
 EXPNO 390  
 PROCNO 1

F2 - Acquisition Parameters  
 Date\_ 20170720  
 Time 16.15  
 INSTRUM spect  
 PROBHD 5 mm PABBO BB/  
 PULPROG zg30  
 TD 65536  
 SOLVENT CDCl3  
 NS 8  
 DS 2  
 SWH 8012.820 Hz  
 FIDRES 0.122266 Hz  
 AQ 4.089465 sec  
 RG 145.29  
 DW 62.400 usec  
 DE 6.50 usec  
 TE 300.0 K  
 D1 1.00000000 sec  
 TD0 1

==== CHANNEL f1 ====  
 SFO1 400.1629712 MHz  
 NUC1 1H  
 P1 13.20 usec  
 PLW1 13.00000000 W

F2 - Processing parameters  
 SI 65536  
 SF 400.1605421 MHz  
 WDW EM  
 SSB 0  
 LB 0.30 Hz  
 GB 0  
 PC 1.00

Figure 41: <sup>1</sup>H NMR spectrum of 3i

NRAT-V-192

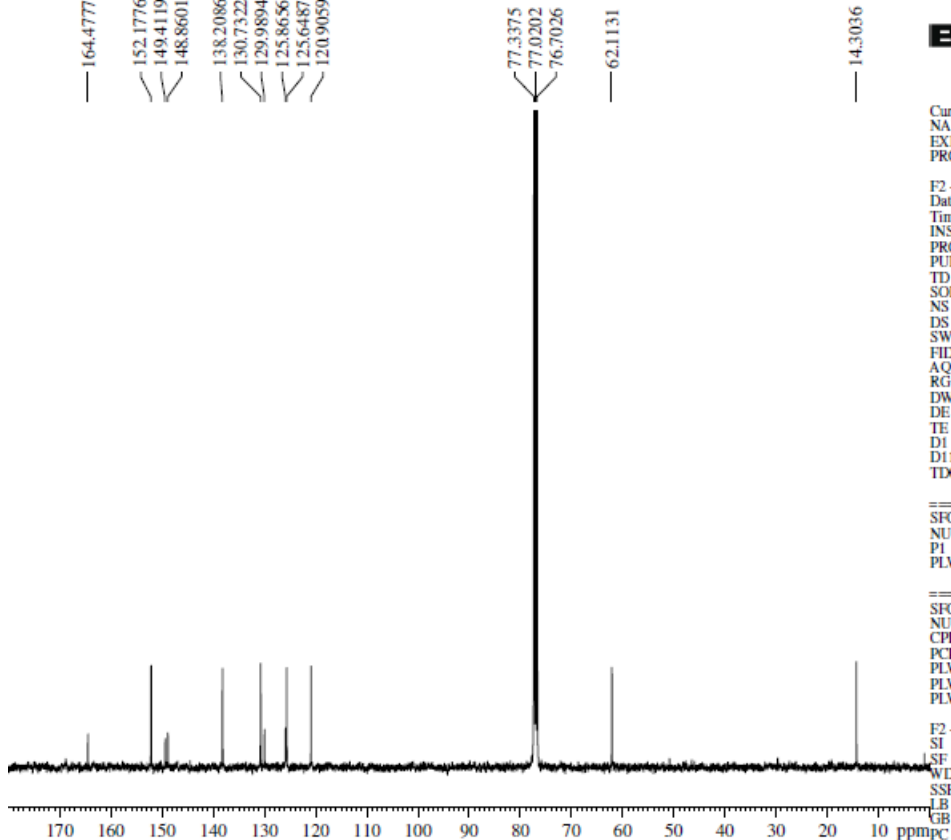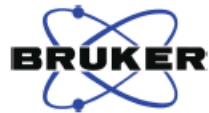

Current Data Parameters  
 NAME 25July-AN-2017  
 EXPNO 350  
 PROCNO 1

F2 - Acquisition Parameters  
 Date\_ 20170726  
 Time 3.24  
 INSTRUM spect  
 PROBHD 5 mm PABBO BB/  
 PULPROG zgpg30  
 TD 65536  
 SOLVENT CDCl3  
 NS 512  
 DS 0  
 SWH 24038.461 Hz  
 FIDRES 0.366798 Hz  
 AQ 1.3631488 sec  
 RG 201.48  
 DW 20.800 usec  
 DE 6.50 usec  
 TE 300.0 K  
 D1 2.00000000 sec  
 D11 0.03000000 sec  
 TD0 1

==== CHANNEL f1 ====  
 SFO1 100.6304993 MHz  
 NUC1 13C  
 P1 9.90 usec  
 PLW1 53.00000000 W

==== CHANNEL f2 ====  
 SFO2 400.1621006 MHz  
 NUC2 1H  
 CPDPRG[2] waltz16  
 PCPD2 90.00 usec  
 PLW2 13.00000000 W  
 PLW12 0.27963999 W  
 PLW13 0.22651000 W

F2 - Processing parameters  
 SI 32768  
 SF 100.6204380 MHz  
 WDW EM  
 SSB 0  
 LB 3.00 Hz  
 GB 0  
 PC 1.40

Figure 42: <sup>13</sup>C NMR spectrum of 3i



NRAT-V-213

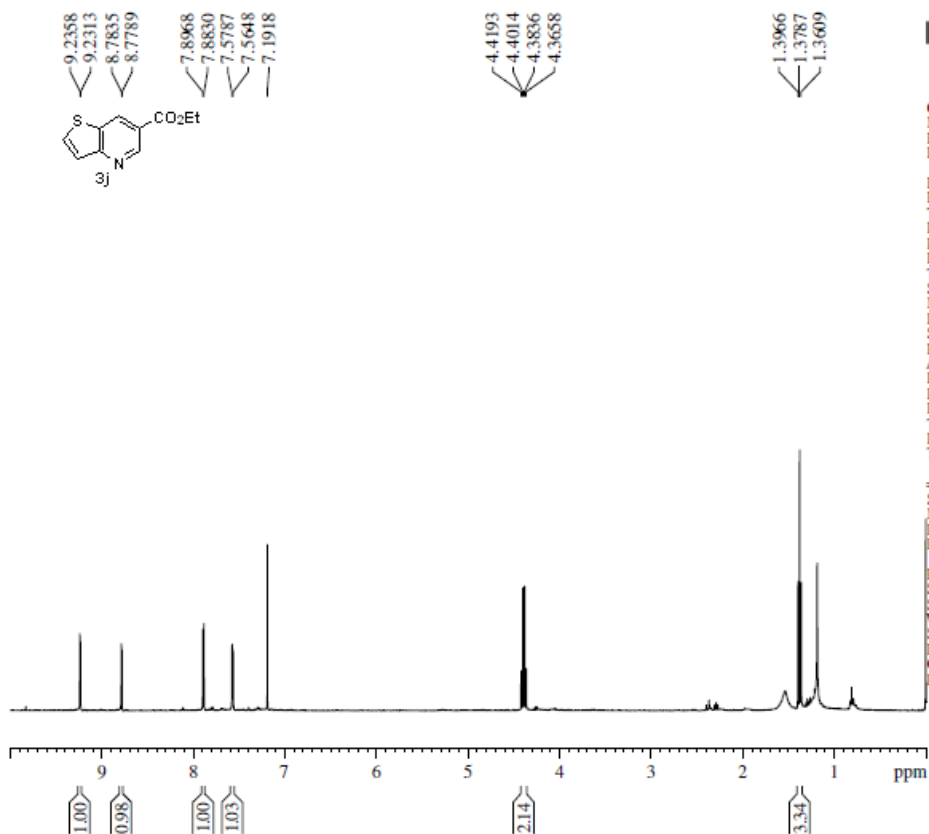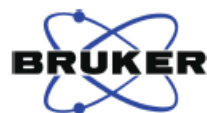

Current Data Parameters  
 NAME 02-APR-FN-2018  
 EXPNO 360  
 PROCNO 1

F2 - Acquisition Parameters  
 Date\_ 20180402  
 Time 14.58  
 INSTRUM spect  
 PROBHD 5 mm PABBO BB/  
 PULPROG zg30  
 TD 65536  
 SOLVENT CDCl3  
 NS 8  
 DS 0  
 SWH 9615.385 Hz  
 FIDRES 0.146719 Hz  
 AQ 3.4078720 sec  
 RG 159.22  
 DW 52.000 usec  
 DE 6.50 usec  
 TE 300.0 K  
 D1 1.00000000 sec  
 TD0 1

==== CHANNEL f1 ====  
 SFO1 400.1629712 MHz  
 NUC1 1H  
 P1 13.20 usec  
 PLW1 13.00000000 W  
 F2 - Processing parameters  
 SI 65536  
 SF 400.1605367 MHz  
 WDW EM  
 SSB 0  
 LB 0.30 Hz  
 GB 0  
 PC 1.00

Figure 43: <sup>1</sup>H NMR spectrum of 3j

NRAT-V-213

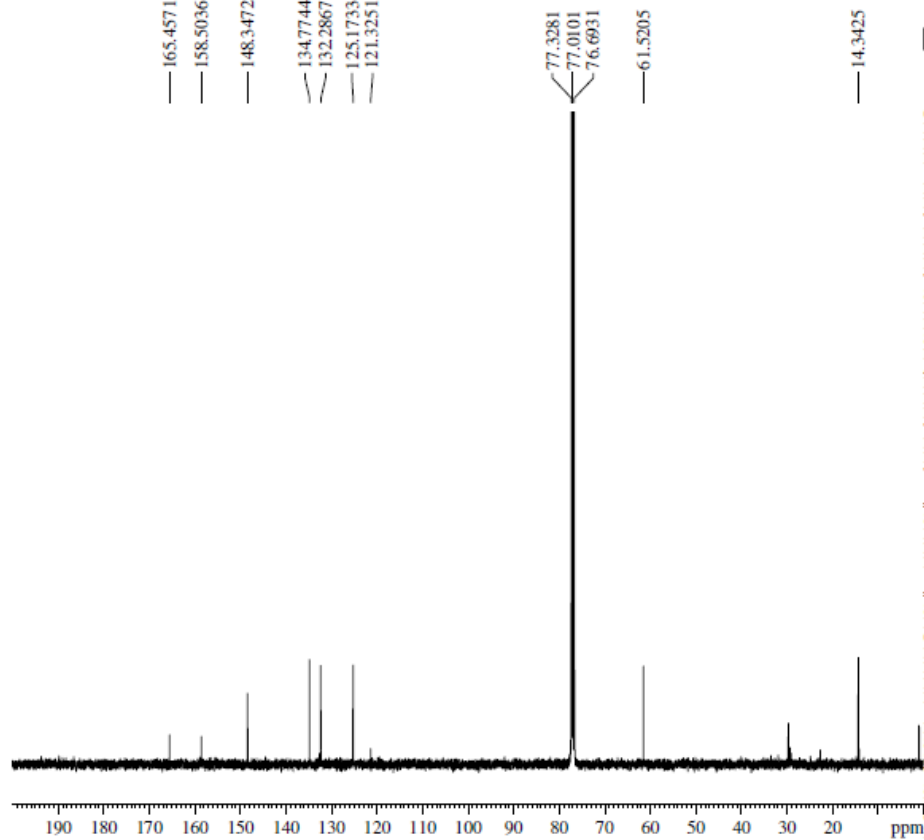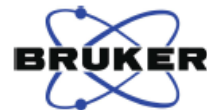

Current Data Parameters  
 NAME 22-June-AN-2018  
 EXPNO 310  
 PROCNO 1

F2 - Acquisition Parameters  
 Date\_ 20180623  
 Time 9.57  
 INSTRUM spect  
 PROBHD 5 mm PABBO BB/  
 PULPROG zgpg30  
 TD 65536  
 SOLVENT CDCl3  
 NS 2048  
 DS 0  
 SWH 24038.461 Hz  
 FIDRES 0.366798 Hz  
 AQ 1.3631488 sec  
 RG 201.48  
 DW 20.800 usec  
 DE 6.50 usec  
 TE 300.0 K  
 D1 2.00000000 sec  
 D11 0.03000000 sec  
 TD0 1

==== CHANNEL f1 ====  
 SFO1 100.6304993 MHz  
 NUC1 13C  
 P1 9.90 usec  
 PLW1 53.00000000 W  
 ==== CHANNEL f2 ====  
 SFO2 400.1621006 MHz  
 NUC2 1H  
 CPDPRG[2] waltz16  
 PCPD2 90.00 usec  
 PLW2 13.00000000 W  
 PLW12 0.27963999 W  
 PLW13 0.22651000 W

F2 - Processing parameters  
 SI 32768  
 SF 100.6204380 MHz  
 WDW EM  
 SSB 0  
 LB 1.00 Hz  
 GB 0  
 PC 1.40

Figure 44: <sup>13</sup>C NMR spectrum of 3j

NRAT-VI-111

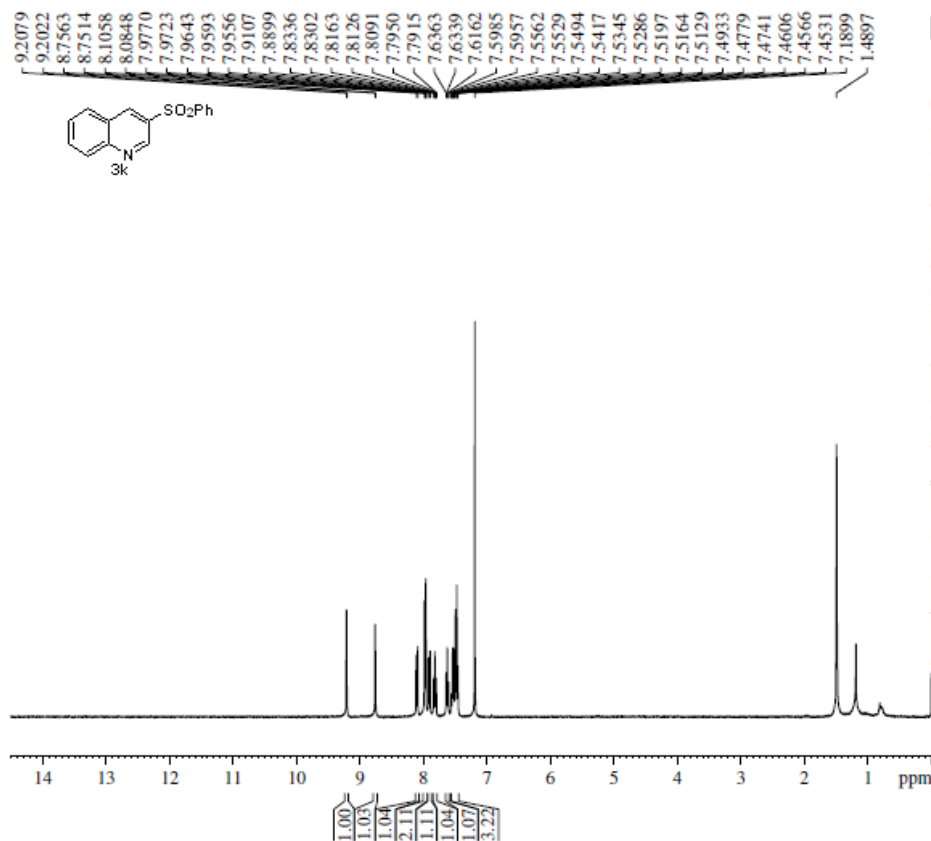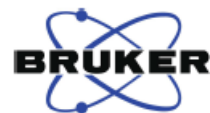

Current Data Parameters  
 NAME 24-APR-AN-2018  
 EXPNO 430  
 PROCNO 1

F2 - Acquisition Parameters  
 Date\_ 20180424  
 Time 19.42  
 INSTRUM spect  
 PROBHD 5 mm PABBO BB/  
 PULPROG zg30  
 TD 65536  
 SOLVENT CDCl3  
 NS 8  
 DS 0  
 SWH 9615.385 Hz  
 FIDRES 0.146719 Hz  
 AQ 3.4078720 sec  
 RG 179.93  
 DW 52.000 usec  
 DE 6.50 usec  
 TE 300.0 K  
 D1 1.00000000 sec  
 TD0 1

==== CHANNEL f1 ====  
 SFO1 400.1629712 MHz  
 NUC1 1H  
 P1 13.20 usec  
 PLW1 13.00000000 W

F2 - Processing parameters  
 SI 65536  
 SF 400.1605371 MHz  
 WDW EM  
 SSB 0  
 LB 0.30 Hz  
 GB 0  
 PC 1.00

Figure 45: <sup>1</sup>H NMR spectrum of 3k

NRAT-VI-111

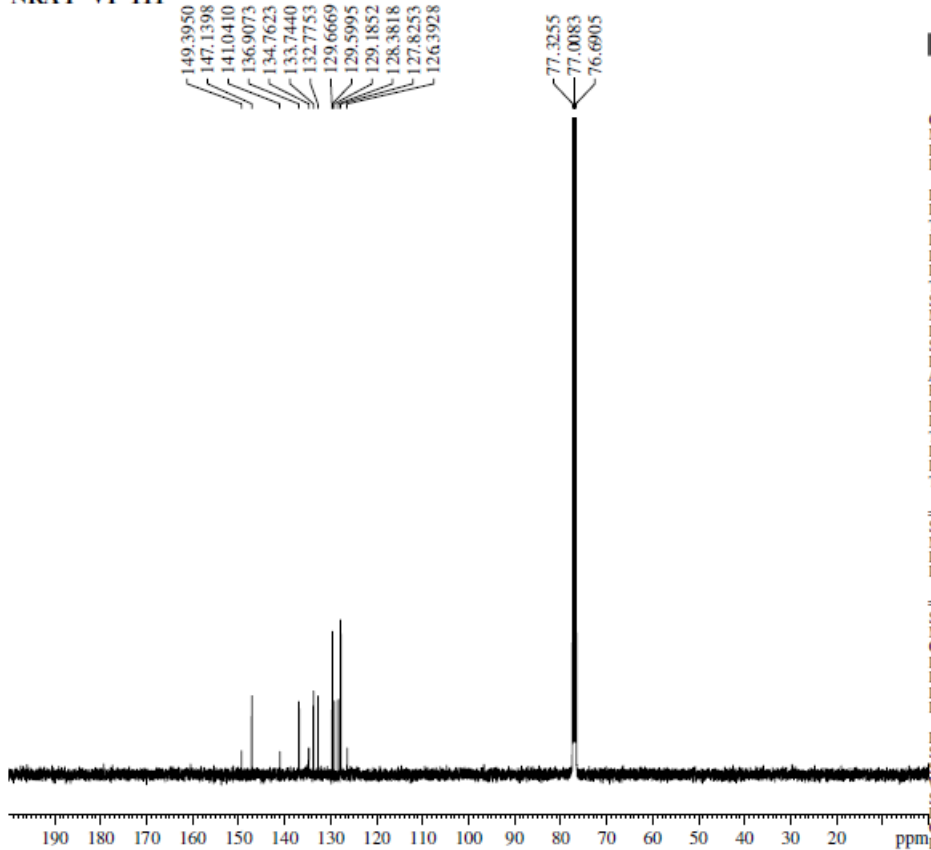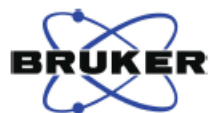

Current Data Parameters  
 NAME 27-Apr-AN-2018  
 EXPNO 320  
 PROCNO 1

F2 - Acquisition Parameters  
 Date\_ 20180428  
 Time 4.26  
 INSTRUM spect  
 PROBHD 5 mm PABBO BB/  
 PULPROG zgpg30  
 TD 65536  
 SOLVENT CDCl3  
 NS 2048  
 DS 0  
 SWH 24038.461 Hz  
 FIDRES 0.366798 Hz  
 AQ 1.3631488 sec  
 RG 201.48  
 DW 20.800 usec  
 DE 6.50 usec  
 TE 300.0 K  
 D1 2.00000000 sec  
 D11 0.03000000 sec  
 TD0 1

==== CHANNEL f1 ====  
 SFO1 100.6304993 MHz  
 NUC1 13C  
 P1 9.90 usec  
 PLW1 53.00000000 W

==== CHANNEL f2 ====  
 SFO2 400.1621006 MHz  
 NUC2 1H  
 CPDPRG2 waltz16  
 PCPD2 90.00 usec  
 PLW2 13.00000000 W  
 PLW12 0.27963999 W  
 PLW13 0.22651000 W

F2 - Processing parameters  
 SI 32768  
 SF 100.6204380 MHz  
 WDW EM  
 SSB 0  
 LB 1.00 Hz  
 GB 0  
 PC 1.40

Figure 46: <sup>13</sup>C NMR spectrum of 3k

NRAT-VI-114

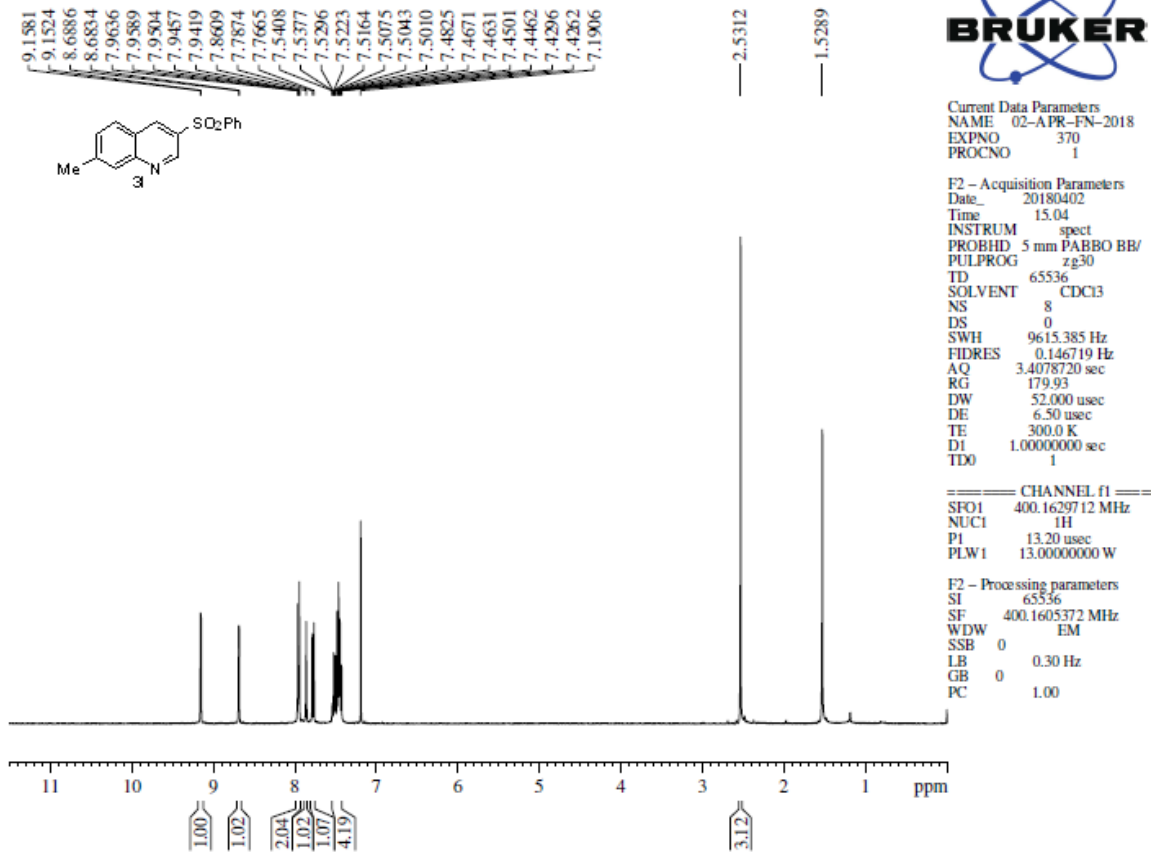

Figure 47: <sup>1</sup>H NMR spectrum of 3I

NRAT-VI-114

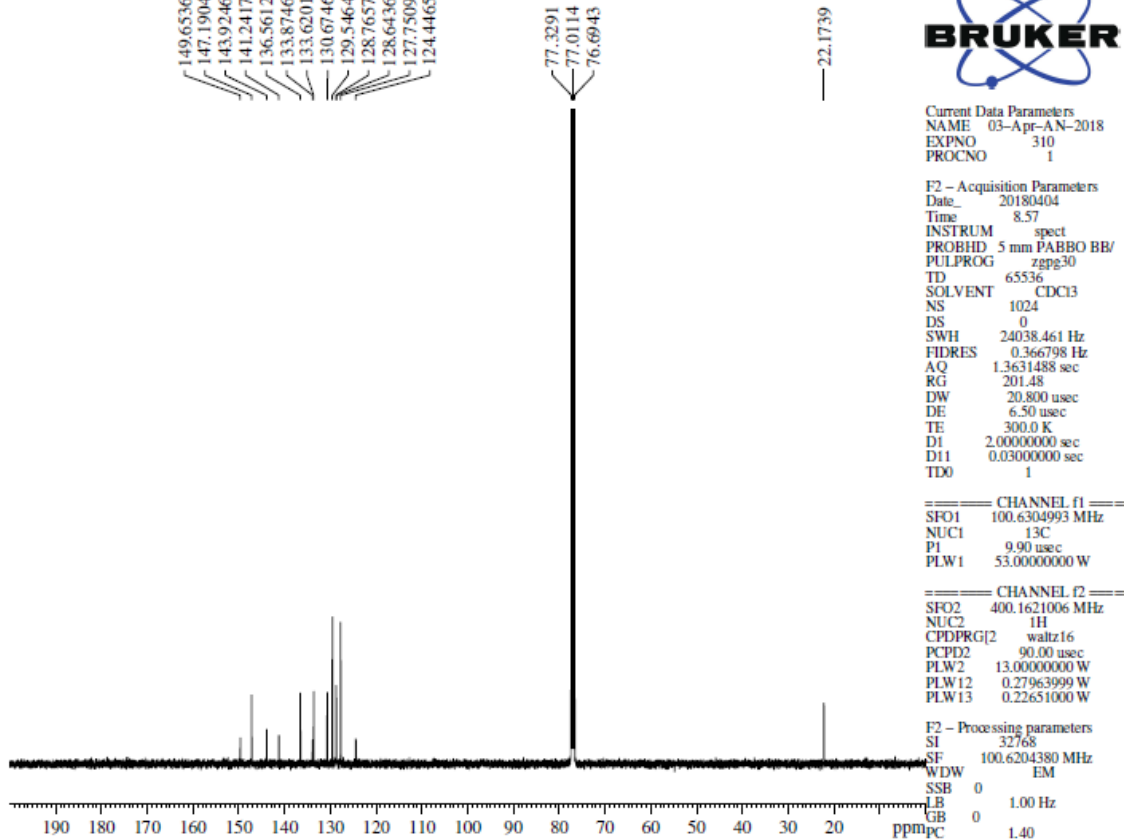

Figure 48: <sup>13</sup>C NMR spectrum of 3I

NRAT-VI-88A

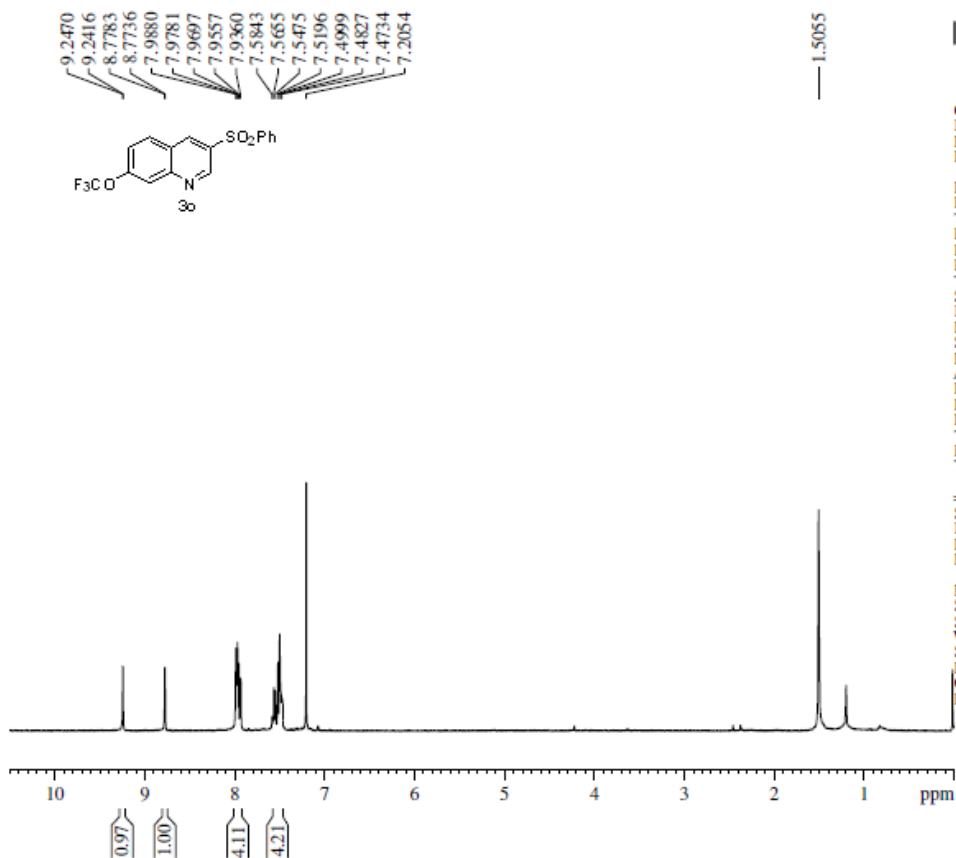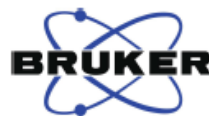

Current Data Parameters  
NAME 10July-FN-2018  
EXPNO 340  
PROCNO 1

F2 - Acquisition Parameters  
Date\_ 20180710  
Time 14.35  
INSTRUM spect  
PROBHD 5 mm PABBO BB/  
PULPROG zg30  
TD 65536  
SOLVENT CDCl3  
NS 8  
DS 0  
SWH 9615.385 Hz  
FIDRES 0.146719 Hz  
AQ 3.4078720 sec  
RG 179.93  
DW 52.000 usec  
DE 6.50 usec  
TE 300.0 K  
D1 1.00000000 sec  
TD0 1

==== CHANNEL f1 ====  
SFO1 400.1629712 MHz  
NUC1 1H  
P1 13.20 usec  
PLW1 13.00000000 W

F2 - Processing parameters  
SI 65536  
SF 400.1605315 MHz  
WDW EM  
SSB 0  
LB 0.30 Hz  
GB 0  
PC 1.00

Figure 49: <sup>1</sup>H NMR spectrum of 3o

NRAT-VI-88 A

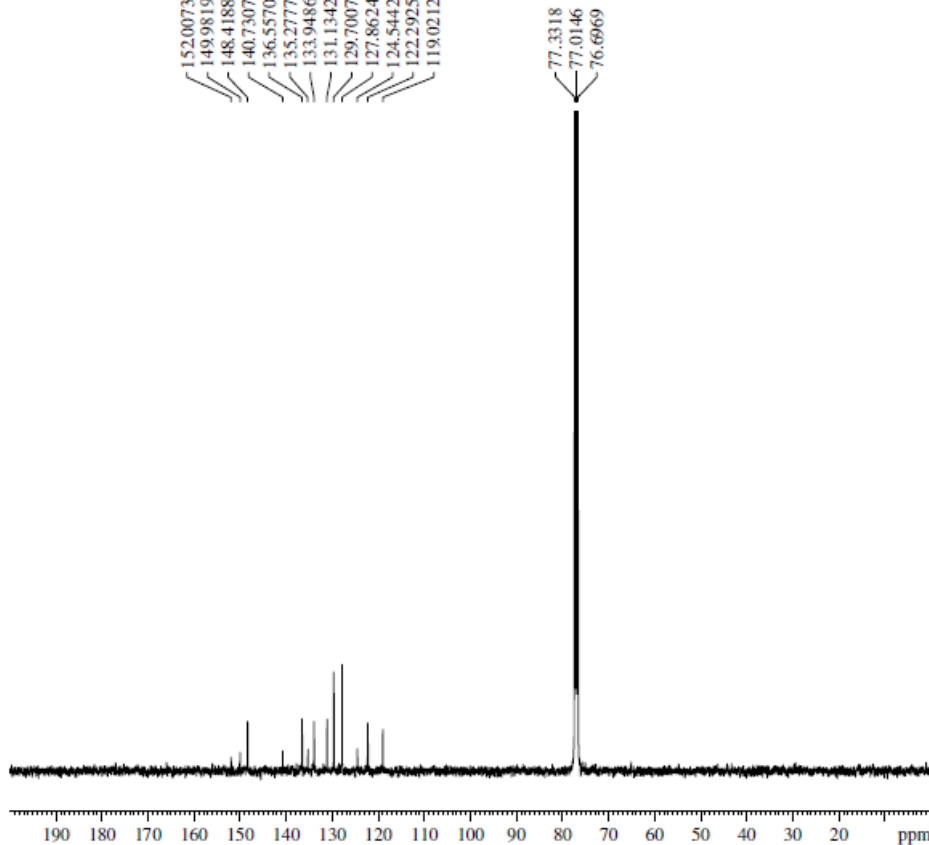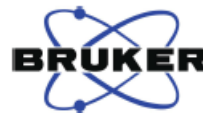

Current Data Parameters  
NAME 24-Aug-FN-2018  
EXPNO 350  
PROCNO 1

F2 - Acquisition Parameters  
Date\_ 20180824  
Time 19.54  
INSTRUM spect  
PROBHD 5 mm PABBO BB/  
PULPROG zgpg30  
TD 65536  
SOLVENT CDCl3  
NS 2048  
DS 0  
SWH 24038.461 Hz  
FIDRES 0.366798 Hz  
AQ 1.3631488 sec  
RG 201.48  
DW 20.800 usec  
DE 6.50 usec  
TE 298.3 K  
D1 2.00000000 sec  
D11 0.03000000 sec  
TD0 1

==== CHANNEL f1 ====  
SFO1 100.6304993 MHz  
NUC1 13C  
P1 9.90 usec  
PLW1 53.00000000 W

==== CHANNEL f2 ====  
SFO2 400.1621006 MHz  
NUC2 1H  
CPDPRG2 waltz16  
PCPD2 90.00 usec  
PLW2 13.00000000 W  
PLW12 0.27963999 W  
PLW13 0.22651000 W

F2 - Processing parameters  
SI 32768  
SF 100.6204380 MHz  
WDW EM  
SSB 0  
LB 3.00 Hz  
GB 0  
PC 1.40

Figure 50: <sup>13</sup>C NMR spectrum of 3o

NRAT-VI-113

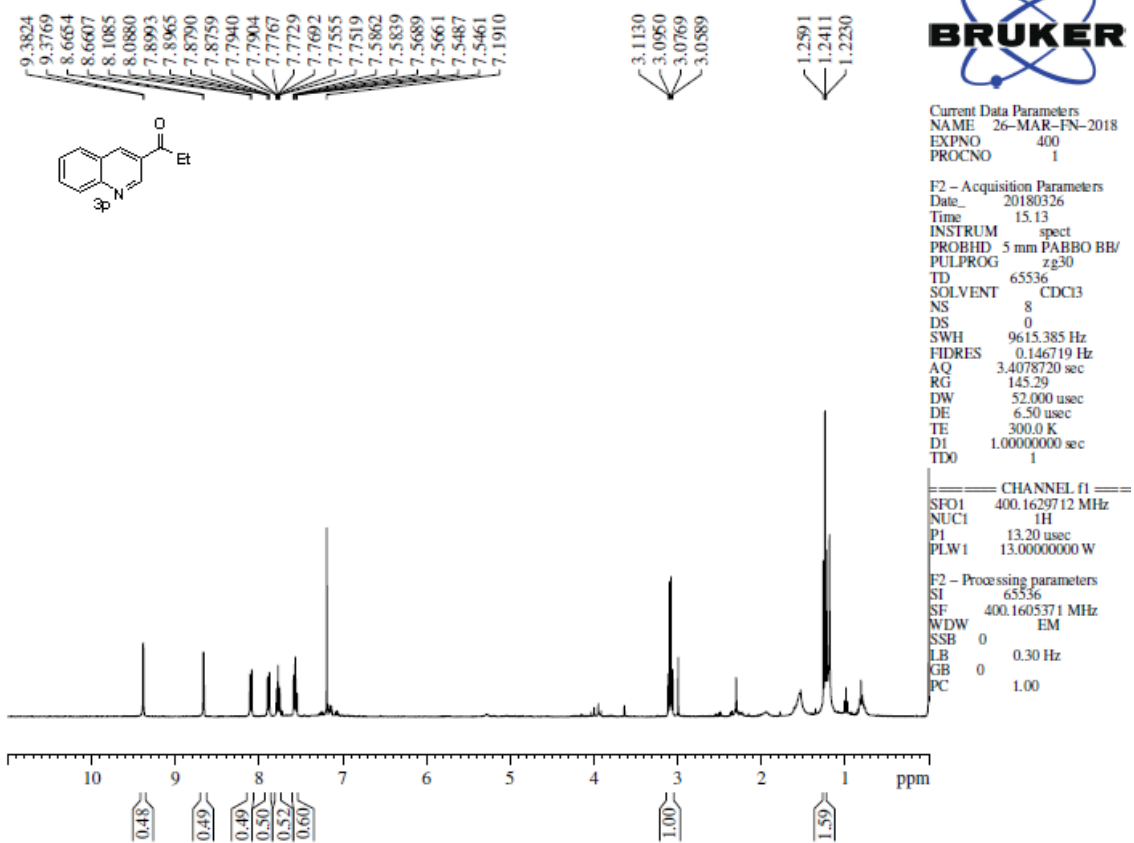

Figure 51: <sup>1</sup>H NMR spectrum of 3p

NRSN-VI-113

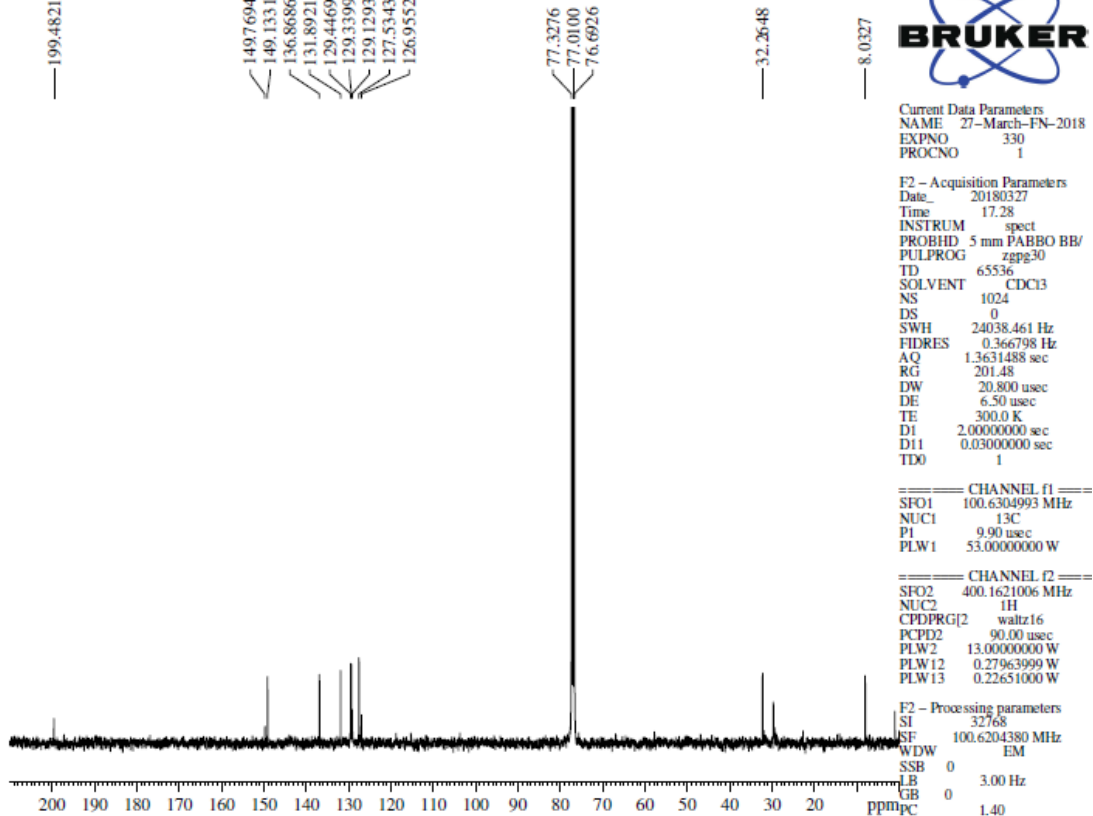

Figure 52: <sup>13</sup>C NMR spectrum of 3p

NRAT-VI-116

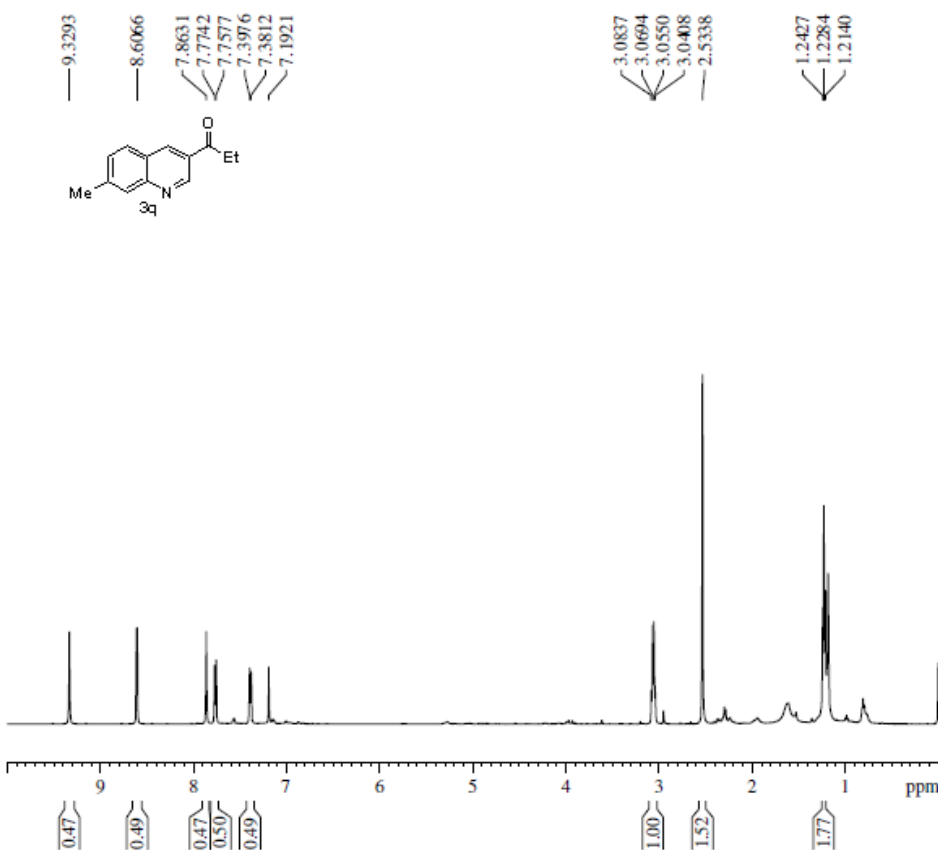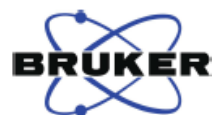

Current Data Parameters  
 NAME 12-Apr-FN-2018  
 EXPNO 410  
 PROCNO 1

F2 - Acquisition Parameters  
 Date\_ 20180412  
 Time 8.16  
 INSTRUM spect  
 PROBHD 5 mm PATX1 1H/  
 PULPROG zg30  
 TD 65536  
 SOLVENT CDC13  
 NS 8  
 DS 2  
 SWH 12019.230 Hz  
 FIDRES 0.183399 Hz  
 AQ 2.7262976 sec  
 RG 181.18  
 DW 41.600 usec  
 DE 6.50 usec  
 TE 300.5 K  
 D1 1.00000000 sec  
 TD0 1

==== CHANNEL f1 ====  
 SFO1 500.6794419 MHz  
 NUC1 1H  
 P1 6.45 usec  
 PLW1 13.60000038 W

F2 - Processing parameters  
 SI 65536  
 SF 500.6763954 MHz  
 WDW EM  
 SSB 0  
 LB 0.30 Hz  
 GB 0  
 PC 1.00

Figure 53: <sup>1</sup>H NMR spectrum of 3q

NRAT-VI-116

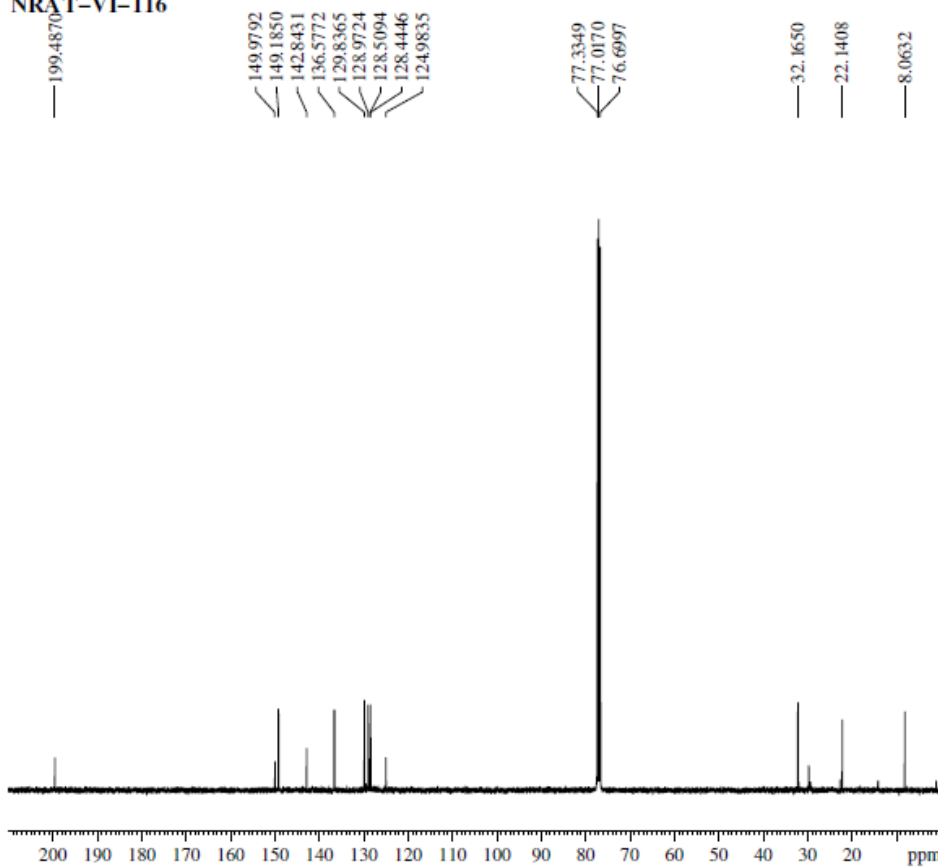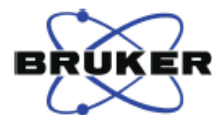

Current Data Parameters  
 NAME 16-APR-FN-2018  
 EXPNO 460  
 PROCNO 1

F2 - Acquisition Parameters  
 Date\_ 20180417  
 Time 3.11  
 INSTRUM spect  
 PROBHD 5 mm PABBO BB/  
 PULPROG zgpg30  
 TD 65536  
 SOLVENT CDC13  
 NS 1024  
 DS 0  
 SWH 24038.461 Hz  
 FIDRES 0.366798 Hz  
 AQ 1.3631488 sec  
 RG 201.48  
 DW 20.800 usec  
 DE 6.50 usec  
 TE 300.0 K  
 D1 2.00000000 sec  
 D11 0.03000000 sec  
 TD0 1

==== CHANNEL f1 ====  
 SFO1 100.6304993 MHz  
 NUC1 13C  
 P1 9.90 usec  
 PLW1 53.00000000 W

==== CHANNEL f2 ====  
 SFO2 400.1621006 MHz  
 NUC2 1H  
 CPDPRG[2] waltz16  
 PCPD2 90.00 usec  
 PLW2 13.00000000 W  
 PLW12 0.27963999 W  
 PLW13 0.22651000 W

F2 - Processing parameters  
 SI 32768  
 SF 100.6204380 MHz  
 WDW EM  
 SSB 0  
 LB 1.00 Hz  
 GB 0  
 PC 1.40

Figure 54: <sup>13</sup>C NMR spectrum of 3q

NRAT-VI-49

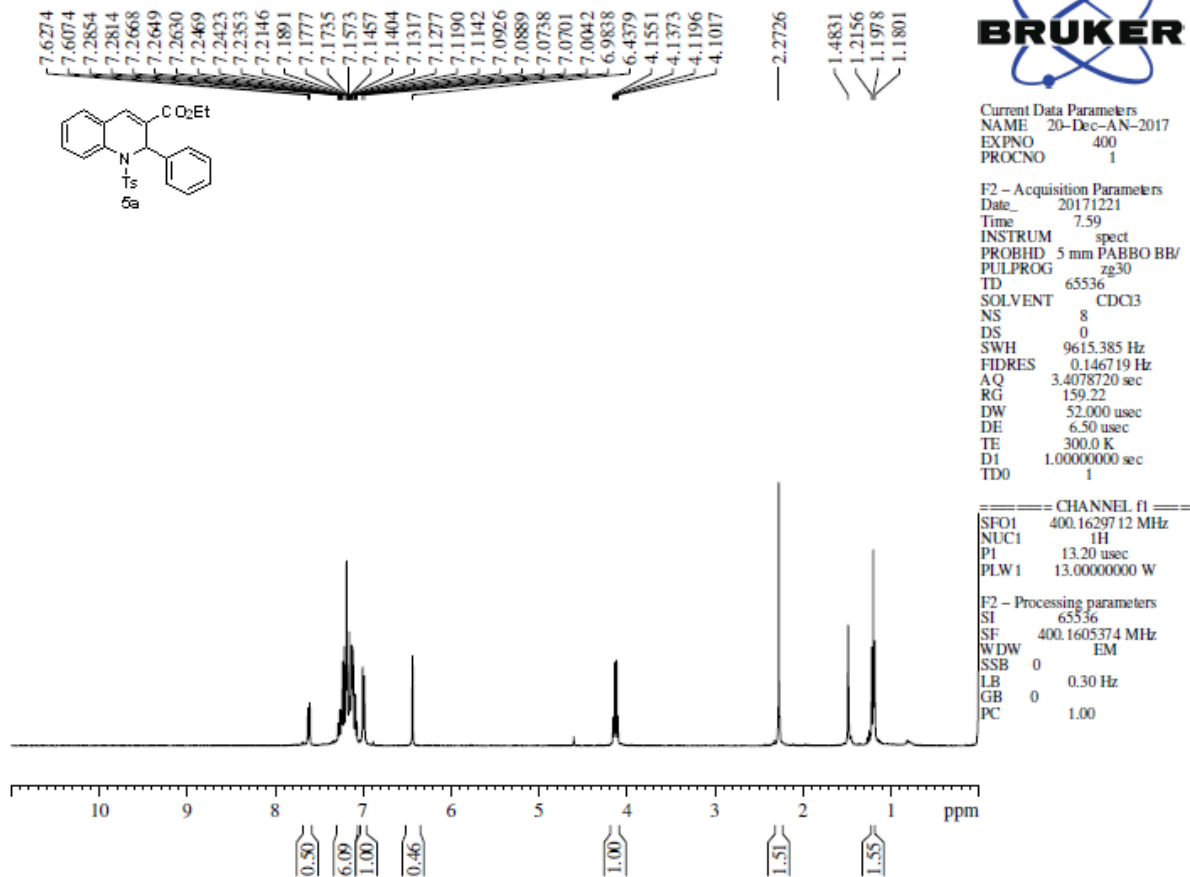

Figure 55: <sup>1</sup>H NMR spectrum of 5a

NRAT-VI-49

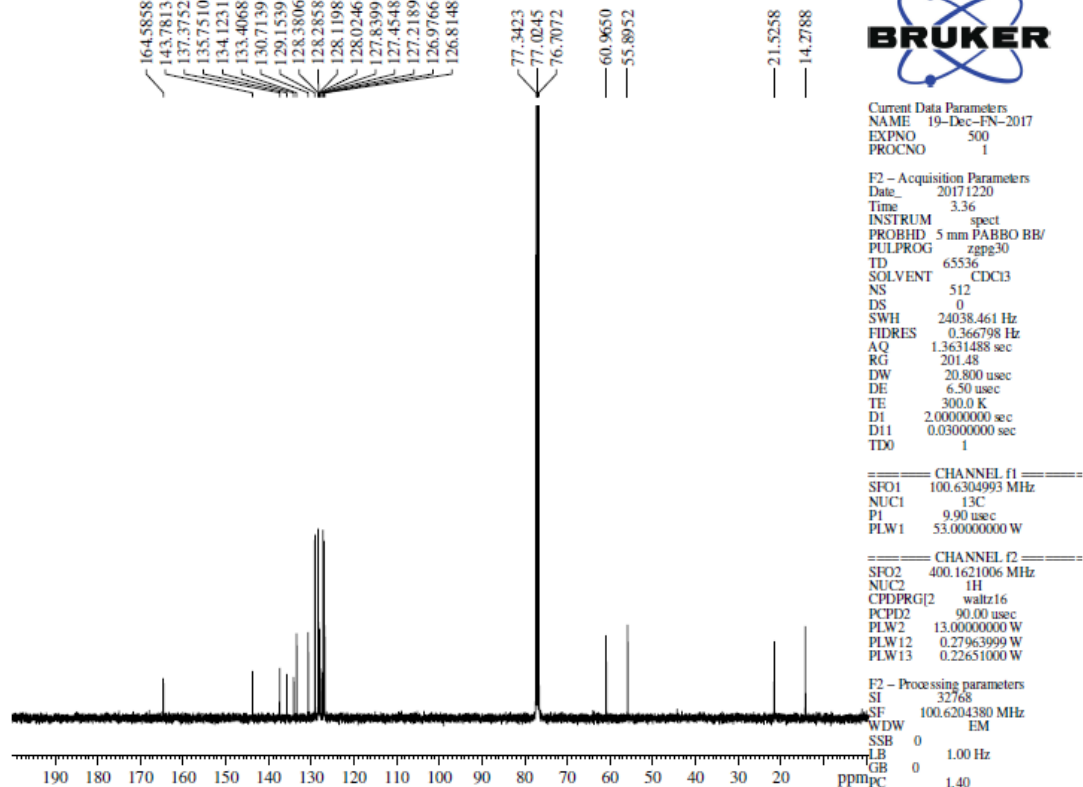

Figure 56: <sup>13</sup>C NMR spectrum of 5a

NRAT-V-225

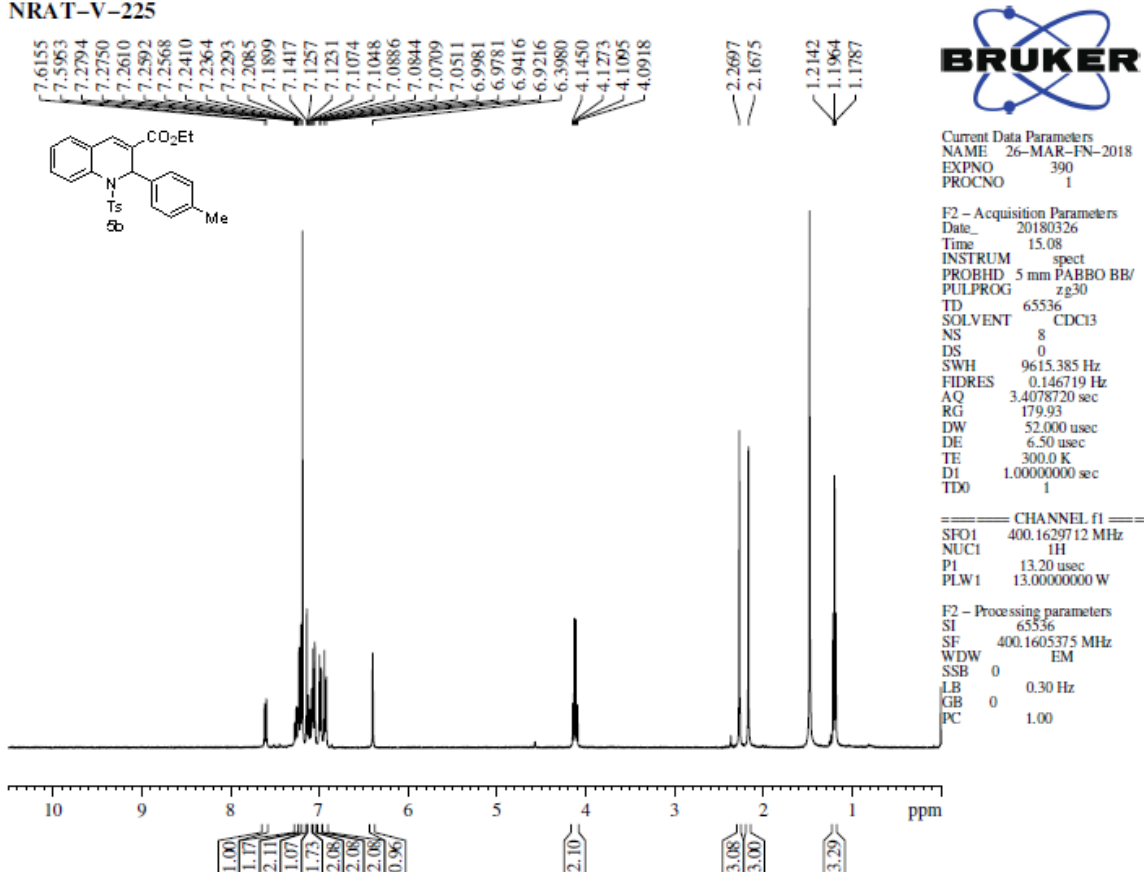

Figure 57: <sup>1</sup>H NMR spectrum of 5b

NRAT-V-225

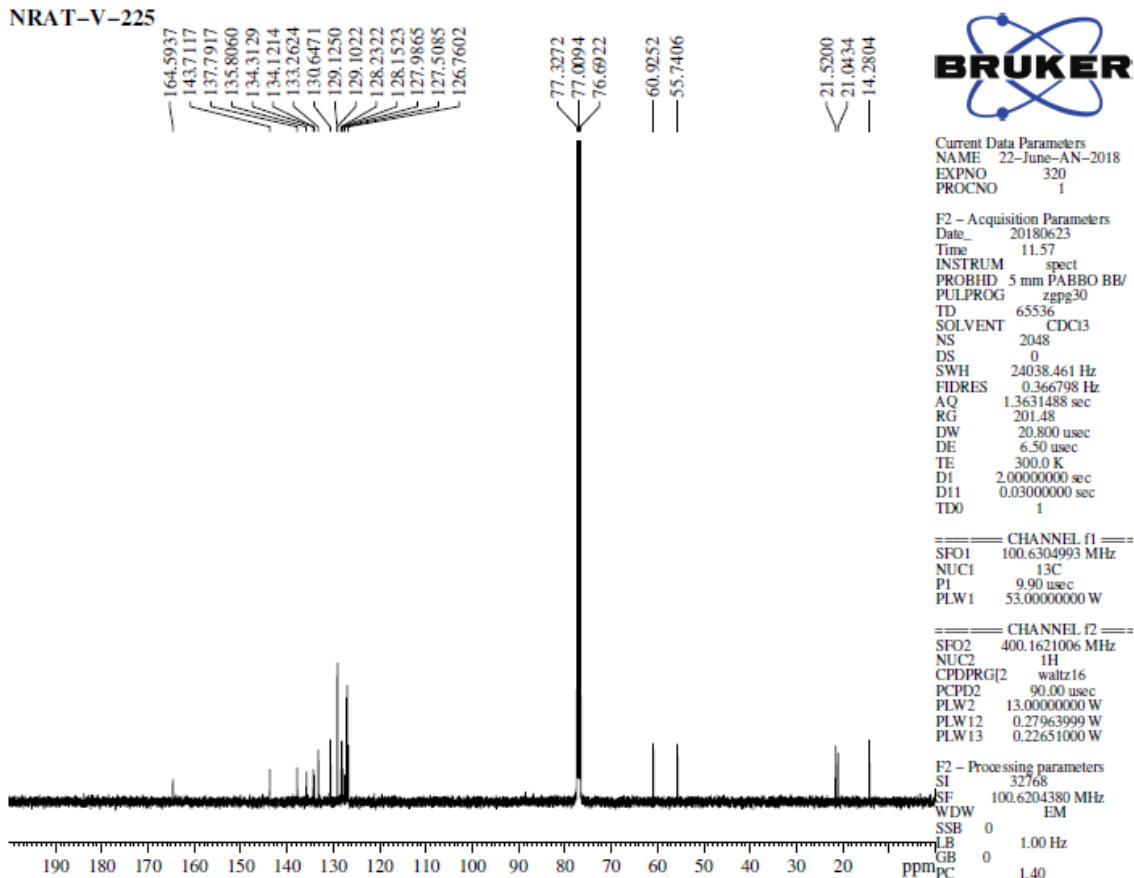

Figure 58: <sup>13</sup>C NMR spectrum of 5b



NRAT-V-224

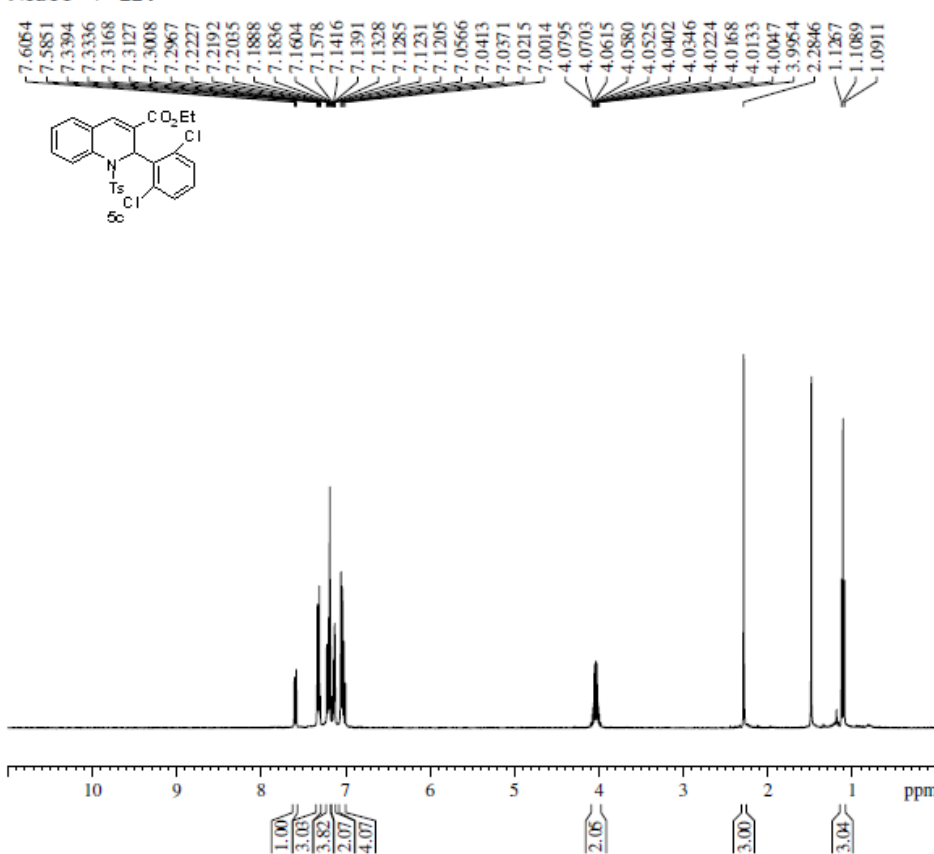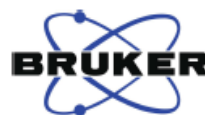

Current Data Parameters  
 NAME 16-Mar-FN-2018  
 EXPNO 370  
 PROCNO 1

F2 - Acquisition Parameters  
 Date\_ 20180317  
 Time 1.57  
 INSTRUM spect  
 PROBHD 5 mm PABBO BB/  
 PULPROG zg30  
 TD 65536  
 SOLVENT CDCl3  
 NS 8  
 DS 0  
 SWH 8012.820 Hz  
 FIDRES 0.122266 Hz  
 AQ 4.0894465 sec  
 RG 179.93  
 DW 62.400 usec  
 DE 6.50 usec  
 TE 300.0 K  
 D1 1.00000000 sec  
 TD0 1

==== CHANNEL f1 ====  
 SFO1 400.1629712 MHz  
 NUC1 1H  
 P1 13.20 usec  
 PLW1 13.00000000 W

F2 - Processing parameters  
 SI 65536  
 SF 400.1605380 MHz  
 WDW EM  
 SSB 0  
 LB 0.30 Hz  
 GB 0  
 PC 1.00

Figure 59: <sup>1</sup>H NMR spectrum of 5c

NRAT-V-224

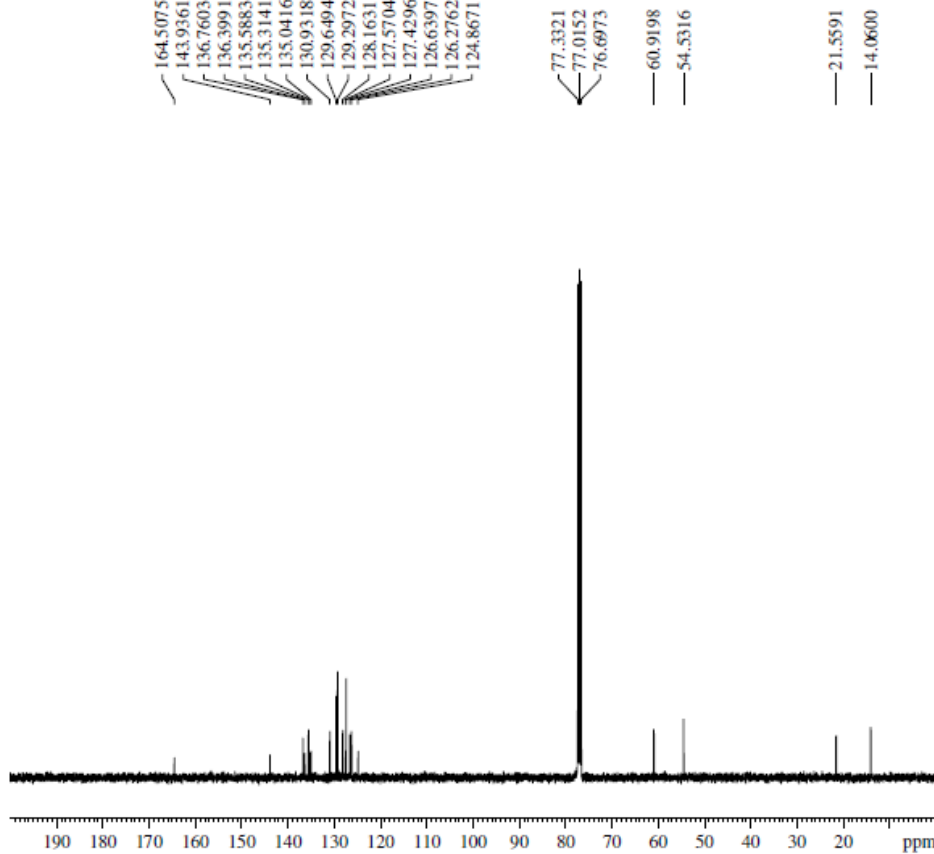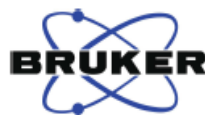

Current Data Parameters  
 NAME 20-Mar-FN-2018  
 EXPNO 350  
 PROCNO 1

F2 - Acquisition Parameters  
 Date\_ 20180320  
 Time 18.50  
 INSTRUM spect  
 PROBHD 5 mm PABBO BB/  
 PULPROG zgpg30  
 TD 65536  
 SOLVENT CDCl3  
 NS 1024  
 DS 4  
 SWH 24038.461 Hz  
 FIDRES 0.366798 Hz  
 AQ 1.3631488 sec  
 RG 201.48  
 DW 20.800 usec  
 DE 6.50 usec  
 TE 300.0 K  
 D1 2.00000000 sec  
 D11 0.03000000 sec  
 TD0 1

==== CHANNEL f1 ====  
 SFO1 100.6304993 MHz  
 NUC1 13C  
 P1 9.90 usec  
 PLW1 53.00000000 W

==== CHANNEL f2 ====  
 SFO2 400.1621006 MHz  
 NUC2 1H  
 CPDPRG2 waltz16  
 PCPD2 90.00 usec  
 PLW2 13.00000000 W  
 PLW12 0.27963999 W  
 PLW13 0.22651000 W

F2 - Processing parameters  
 SI 32768  
 SF 100.6204380 MHz  
 WDW EM  
 SSB 0  
 LB 1.00 Hz  
 GB 0  
 PC 1.40

Figure 60: <sup>13</sup>C NMR spectrum of 5c

NRAT-VI-85

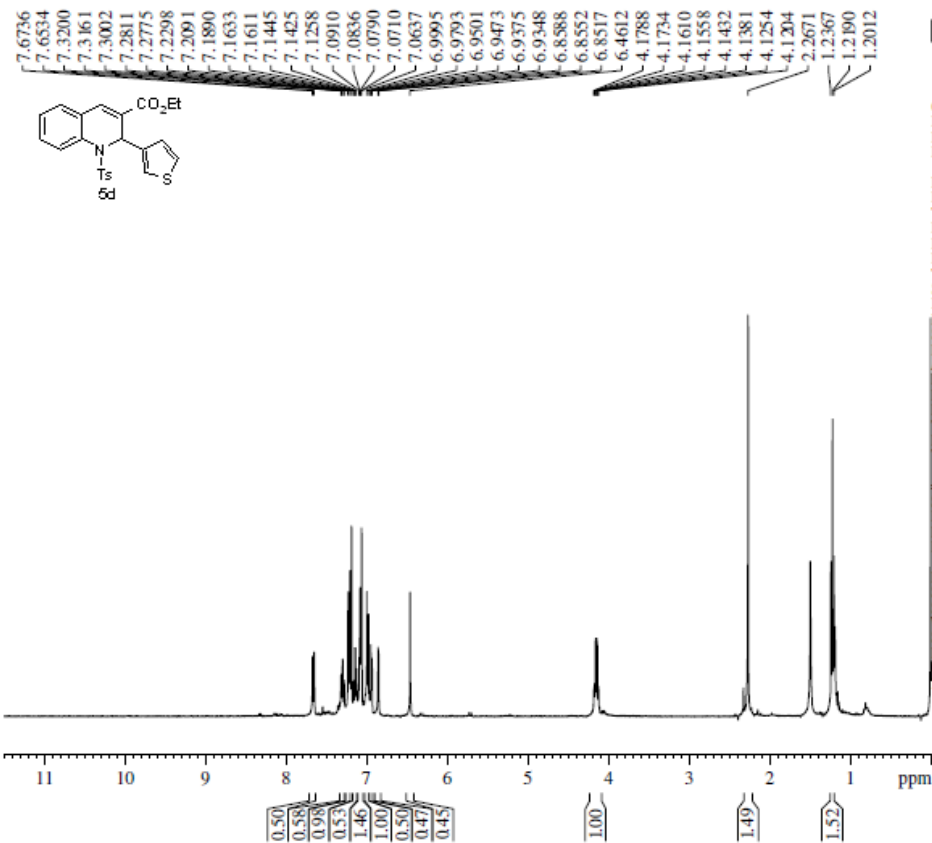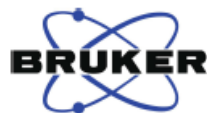

Current Data Parameters  
 NAME 08-Mar-FN-2018  
 EXPNO 320  
 PROCNO 1

F2 - Acquisition Parameters  
 Date\_ 20180308  
 Time 15.51  
 INSTRUM spect  
 PROBHD 5 mm PABBO BB/  
 PULPROG zg30  
 TD 65536  
 SOLVENT CDCl3  
 NS 8  
 DS 0  
 SWH 9615.385 Hz  
 FIDRES 0.146719 Hz  
 AQ 3.4078720 sec  
 RG 145.29  
 DW 52.000 usec  
 DE 6.50 usec  
 TE 300.0 K  
 D1 1.00000000 sec  
 TDO 1

==== CHANNEL f1 ====  
 SFO1 400.1629712 MHz  
 NUC1 1H  
 P1 13.20 usec  
 PLW1 13.00000000 W

F2 - Processing parameters  
 SI 65536  
 SF 400.1605378 MHz  
 WDW EM  
 SSB 0  
 LB 0.30 Hz  
 GB 0  
 PC 1.00

Figure 61: <sup>1</sup>H NMR spectrum of 5d

NRAT-VI-85

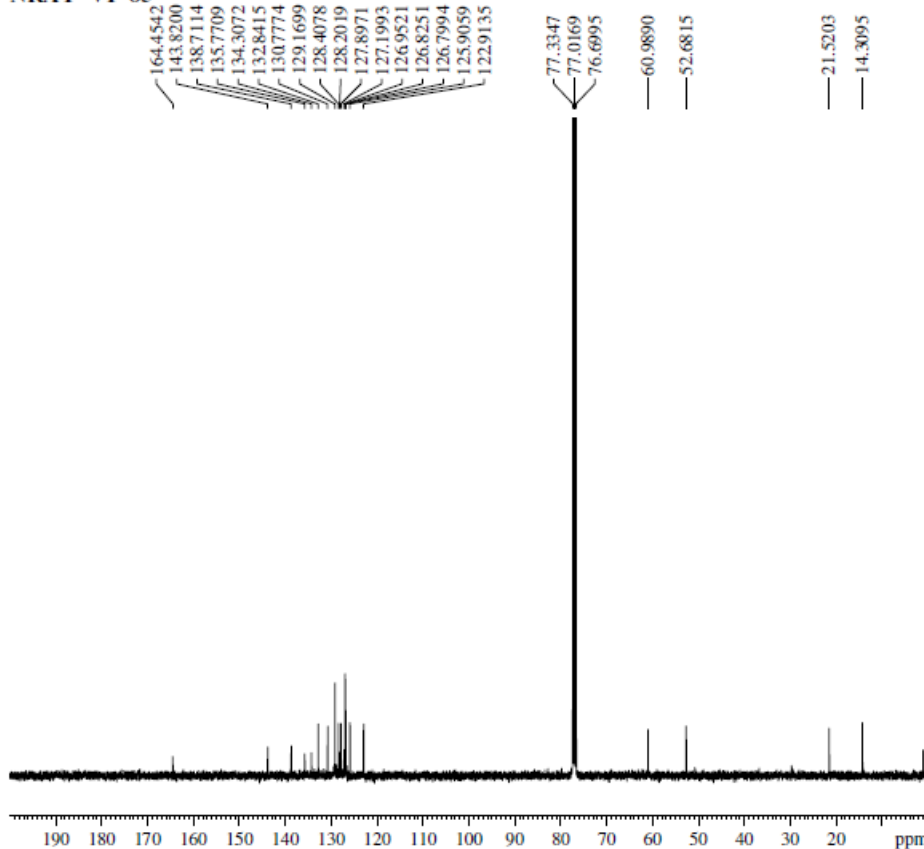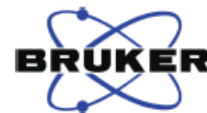

Current Data Parameters  
 NAME 15-Feb-FN-2018  
 EXPNO 340  
 PROCNO 1

F2 - Acquisition Parameters  
 Date\_ 20180215  
 Time 20.16  
 INSTRUM spect  
 PROBHD 5 mm PABBO BB/  
 PULPROG zgpg30  
 TD 65536  
 SOLVENT CDCl3  
 NS 512  
 DS 0  
 SWH 24038.461 Hz  
 FIDRES 0.366798 Hz  
 AQ 1.3631488 sec  
 RG 201.48  
 DW 20.800 usec  
 DE 6.50 usec  
 TE 300.0 K  
 D1 2.00000000 sec  
 D11 0.03000000 sec  
 TDO 1

==== CHANNEL f1 ====  
 SFO1 100.6304993 MHz  
 NUC1 13C  
 P1 9.90 usec  
 PLW1 53.00000000 W

==== CHANNEL f2 ====  
 SFO2 400.1621006 MHz  
 NUC2 1H  
 CPDPRG12 waltz16  
 PCPD2 90.00 usec  
 PLW2 13.00000000 W  
 PLW12 0.27963999 W  
 PLW13 0.22651000 W

F2 - Processing parameters  
 SI 32768  
 SF 100.6204380 MHz  
 WDW EM  
 SSB 0  
 LB 1.00 Hz  
 GB 0  
 PC 1.40

Figure 62: <sup>13</sup>C NMR spectrum of 5d

NRAT-IV-50

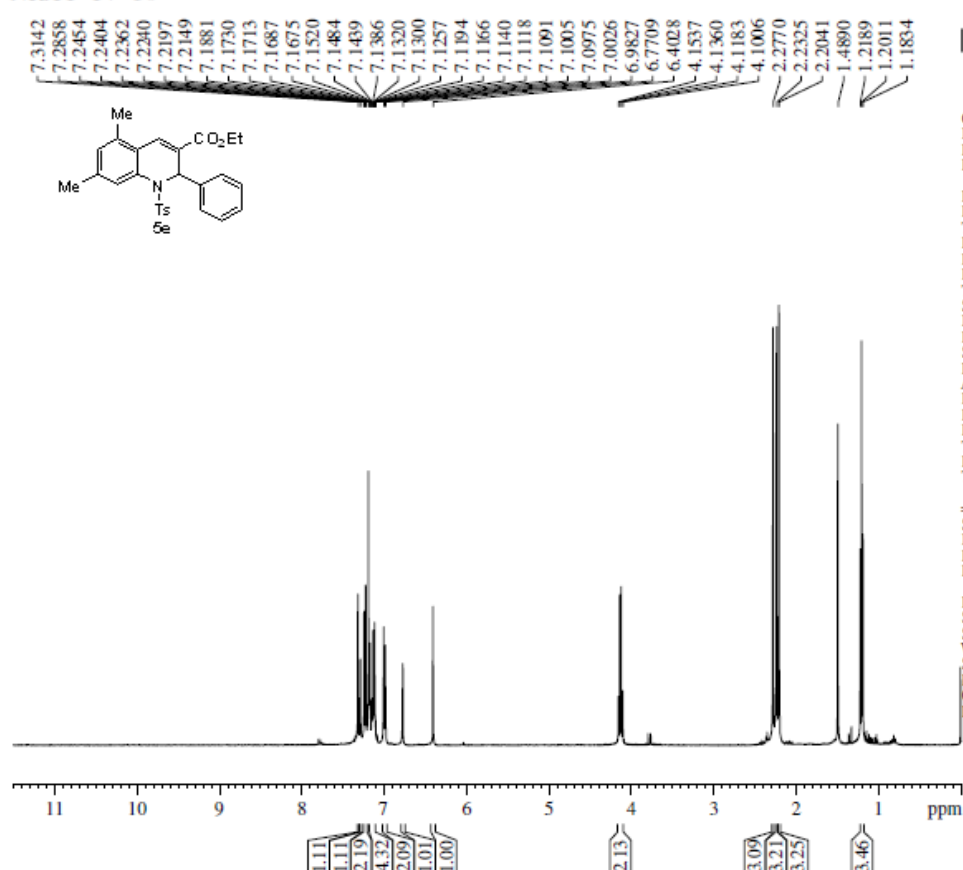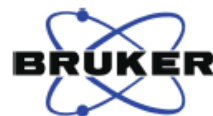

Current Data Parameters  
 NAME 21-MAR-AN-2018  
 EXPNO 460  
 PROCNO 1

F2 - Acquisition Parameters  
 Date\_ 20180321  
 Time 18.08  
 INSTRUM spect  
 PROBHD 5 mm PABBO BB/  
 PULPROG zg30  
 TD 65536  
 SOLVENT CDCl3  
 NS 8  
 DS 0  
 SWH 9615.385 Hz  
 FIDRES 0.146719 Hz  
 AQ 3.4078720 sec  
 RG 129.57  
 DW 52.000 usec  
 DE 6.50 usec  
 TE 300.0 K  
 D1 1.00000000 sec  
 TDO 1

==== CHANNEL f1 ====  
 SFO1 400.1629712 MHz  
 NUC1 1H  
 P1 13.20 usec  
 PLW1 13.00000000 W

F2 - Processing parameters  
 SI 65536  
 SF 400.1605380 MHz  
 WDW EM  
 SSB 0  
 LB 0.30 Hz  
 GB 0  
 PC 1.00

Figure 63: <sup>1</sup>H NMR spectrum of 5e

NRAT-VI-56

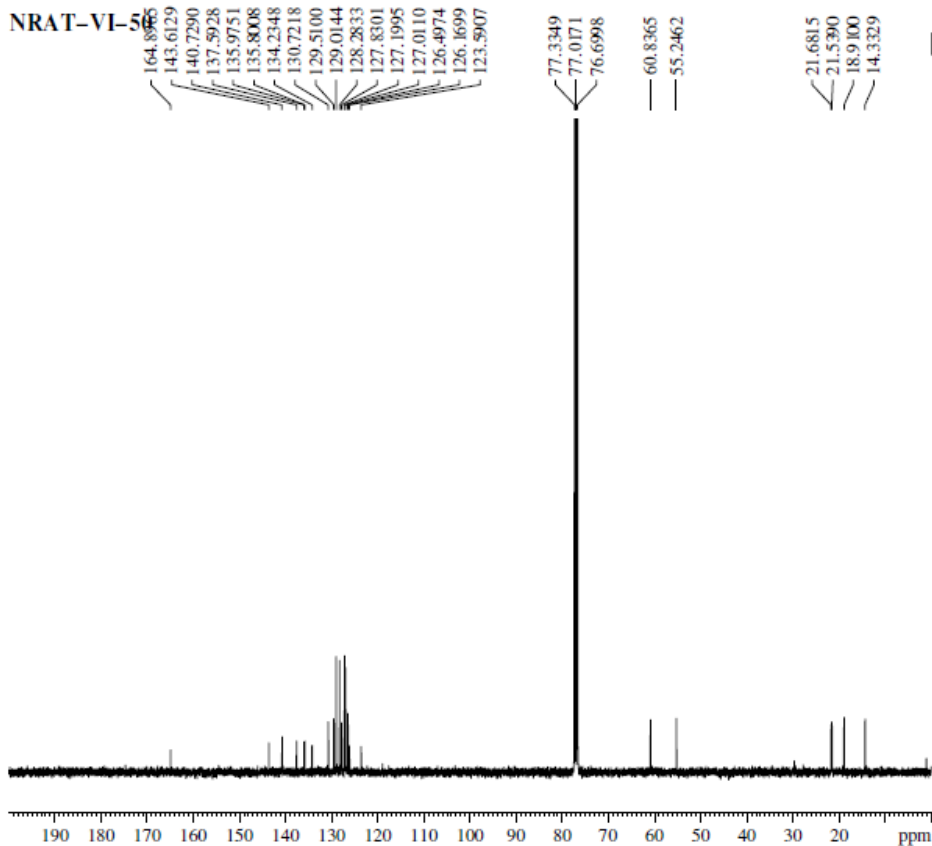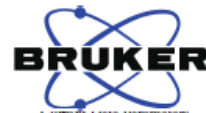

Current Data Parameters  
 NAME 20-Dec-AN-2017  
 EXPNO 410  
 PROCNO 1

F2 - Acquisition Parameters  
 Date\_ 20171221  
 Time 8.33  
 INSTRUM spect  
 PROBHD 5 mm PABBO BB/  
 PULPROG zgpg30  
 TD 65536  
 SOLVENT CDCl3  
 NS 512  
 DS 0  
 SWH 24038.461 Hz  
 FIDRES 0.366798 Hz  
 AQ 1.3631488 sec  
 RG 201.48  
 DW 20.800 usec  
 DE 6.50 usec  
 TE 300.0 K  
 D1 2.00000000 sec  
 D11 0.03000000 sec  
 TDO 1

==== CHANNEL f1 ====  
 SFO1 100.6304993 MHz  
 NUC1 13C  
 P1 9.90 usec  
 PLW1 53.00000000 W

==== CHANNEL f2 ====  
 SFO2 400.1621006 MHz  
 NUC2 1H  
 CPDPRG2 waltz16  
 PCPD2 90.00 usec  
 PLW2 13.00000000 W  
 PLW12 0.27963999 W  
 PLW13 0.22651000 W

F2 - Processing parameters  
 SI 32768  
 SF 100.6204380 MHz  
 WDW EM  
 SSB 0  
 LB 1.00 Hz  
 GB 0  
 PC 1.40

Figure 64: <sup>13</sup>C NMR spectrum of 5e

NRAT-VI-80

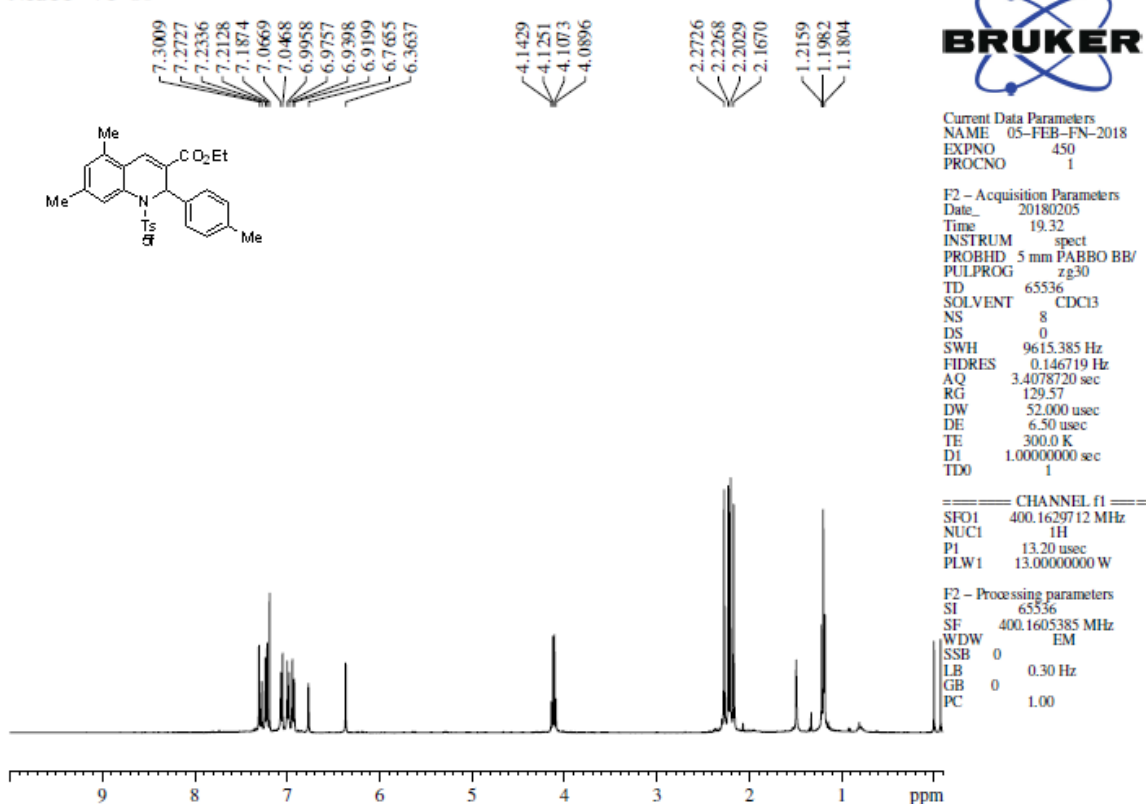

Figure 65: <sup>1</sup>H NMR spectrum of 5f

NRAT-VI-80

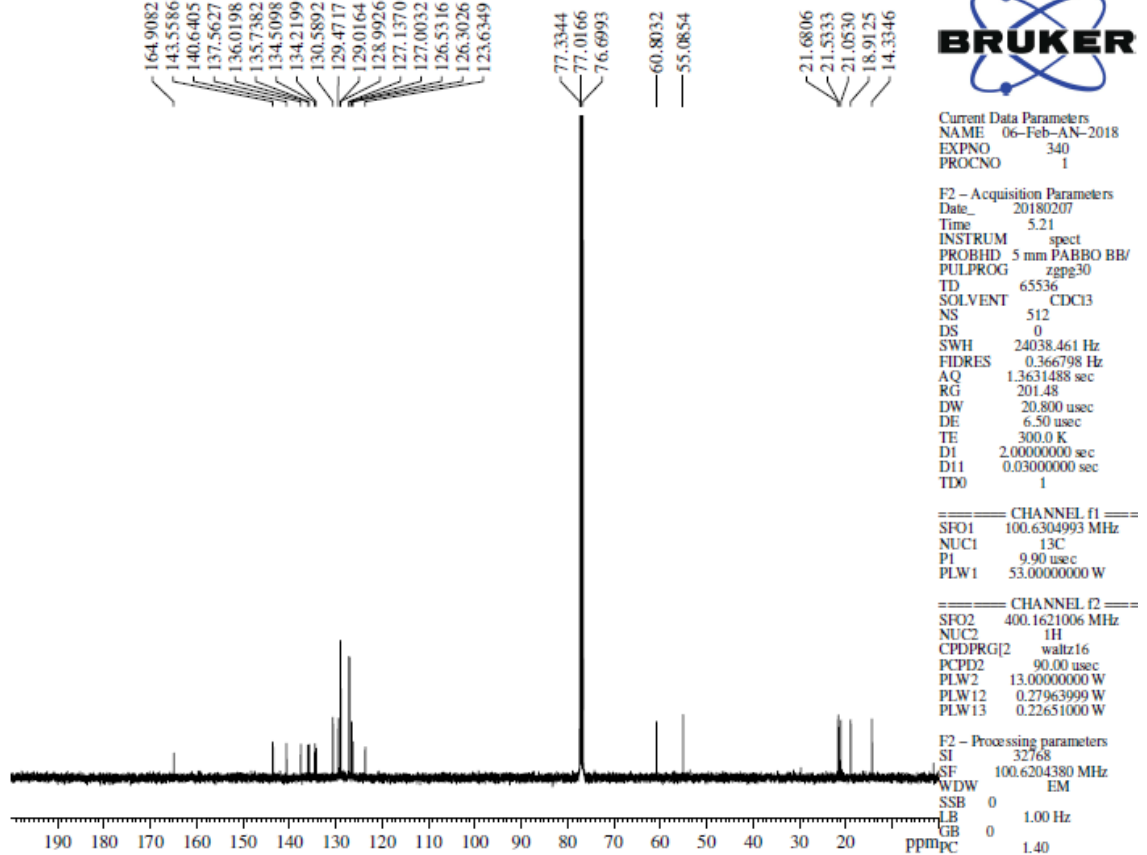

Figure 66: <sup>13</sup>C NMR spectrum of 5f

NRAT-VI-81

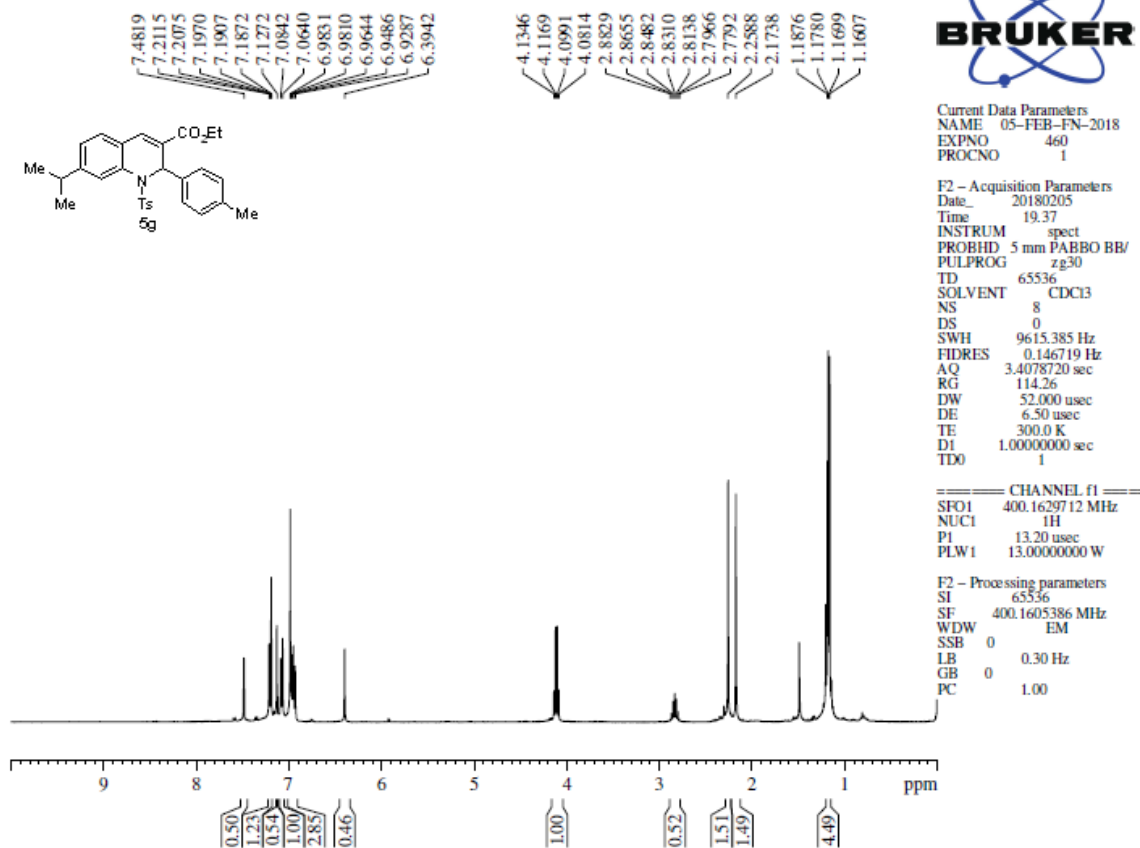

Figure 67: <sup>1</sup>H NMR spectrum of 5g

NRAT-VI-81

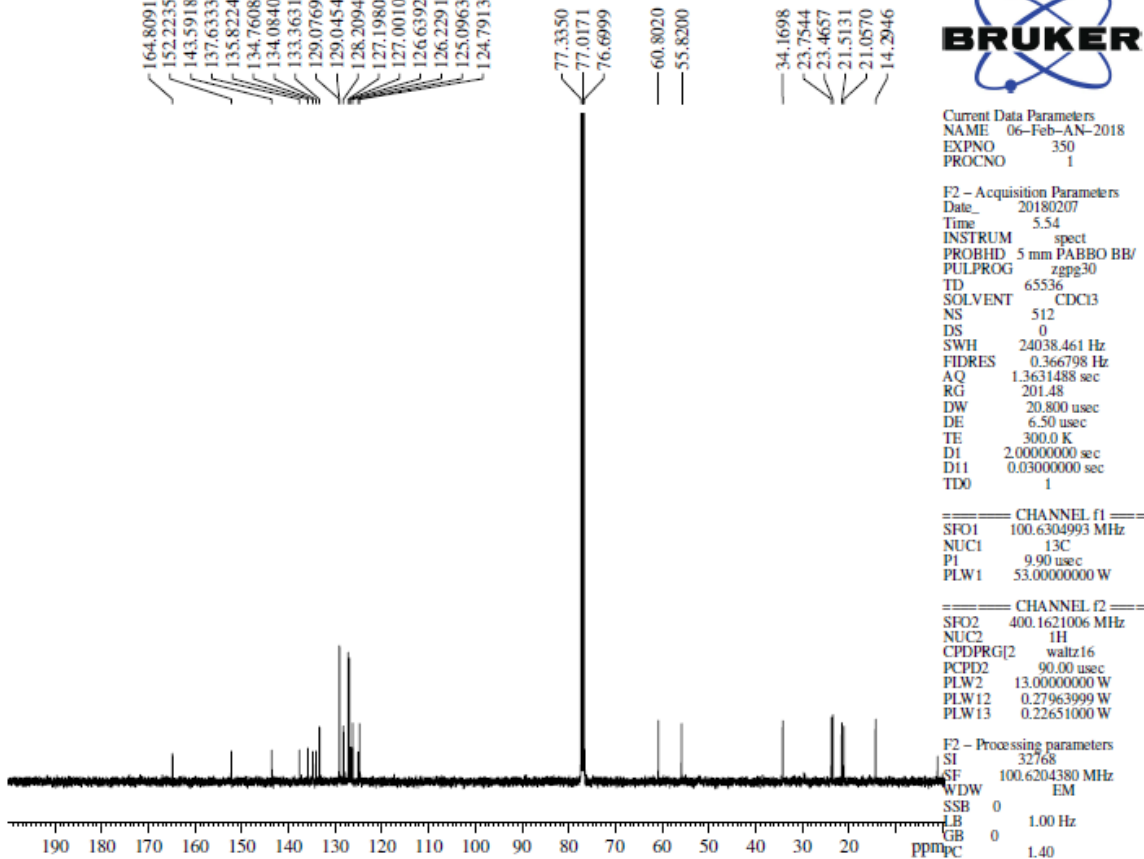

Figure 68: <sup>13</sup>C NMR spectrum of 5g

NRAT VI 78

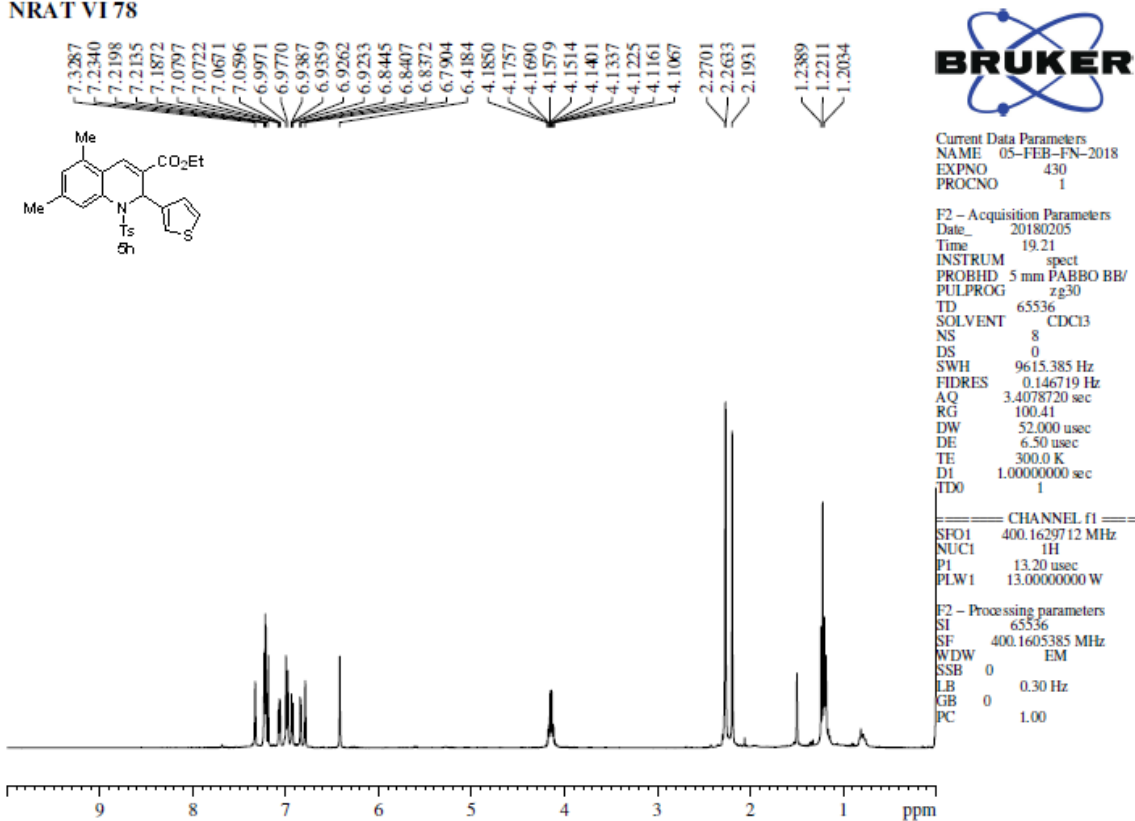

Figure 69: <sup>1</sup>H NMR spectrum of 5h

NRAT-VI-78

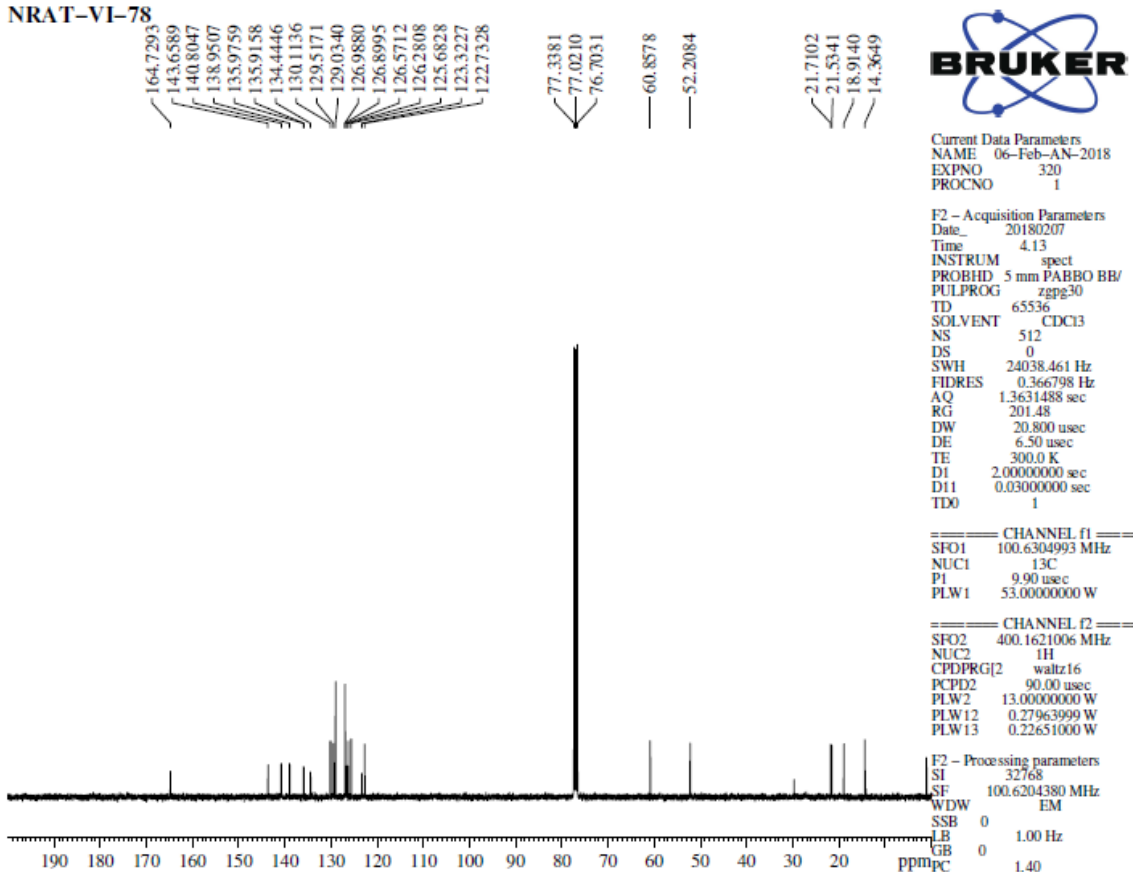

Figure 70: <sup>13</sup>C NMR spectrum of 5h
